# Supplementary material for: Novel aryltriazole acyclic C-azanucleosides as anticancer candidates
Source: Royal Society of Chemistry journal article supplement (doi:10.1039/d0ob02164d), 2020-01-01

## Supporting Information

### Novel Aryltriazole Acyclic C-Azanucleosides as Anticancer Candidates

Yanhua Zhang<sup>a#</sup>, Yun Lin<sup>a#</sup>, Qianqian Hou<sup>a</sup>, Xi Liu<sup>a</sup>, Sabrina Pricl<sup>b,c</sup>, Ling Peng<sup>d</sup>, Yi  
Xia<sup>a\*</sup>

<sup>a</sup> Chongqing Key Laboratory of Natural Product Synthesis and Drug Research,  
School of Pharmaceutical Sciences, Chongqing University, Chongqing, 401331,  
China.

<sup>b</sup> Molecular Biology and Nanotechnology Laboratory (MolBNL@UniTS), DEA,  
University of Trieste, Trieste, Italy

<sup>c</sup> Department of General Biophysics, Faculty of Biology and Environmental  
Protection, University of Lodz, 90-236 Lodz, Poland

<sup>d</sup> Aix-Marseille Université, CNRS, Centre Interdisciplinaire de Nanoscience de  
Marseille (CINaM), UMR 7325, Equipe Labellisé par La Ligue, 13288 Marseille,  
France.

\*Corresponding Author

Dr. Yi XIA, Email: [yixia@cqu.edu.cn](mailto:yixia@cqu.edu.cn)

# These authors contribute equally to this work

## Table of Contents

|                                                       |     |
|-------------------------------------------------------|-----|
| Figure S1 .....                                       | S3  |
| Figure S2 .....                                       | S4  |
| Figure S3 .....                                       | S5  |
| Figure S4 .....                                       | S6  |
| Figure S5 .....                                       | S7  |
| Table S1 .....                                        | S8  |
| Table S2 .....                                        | S10 |
| Table S3 .....                                        | S12 |
| <sup>1</sup> H NMR, <sup>13</sup> C NMR spectra ..... | S13 |
| HPLC spectra .....                                    | S39 |

**Figure S1.** The UV-Visible spectrum of **Ia**, **If**, **Ig**, **Ii**, **Ij**, **Ik**, **II** and **II** in MeOH (50  $\mu$ M) was recorded on Agilent Cary 60 UV-Vis Spectrophotometer within the spectral region of 200-400 nm.

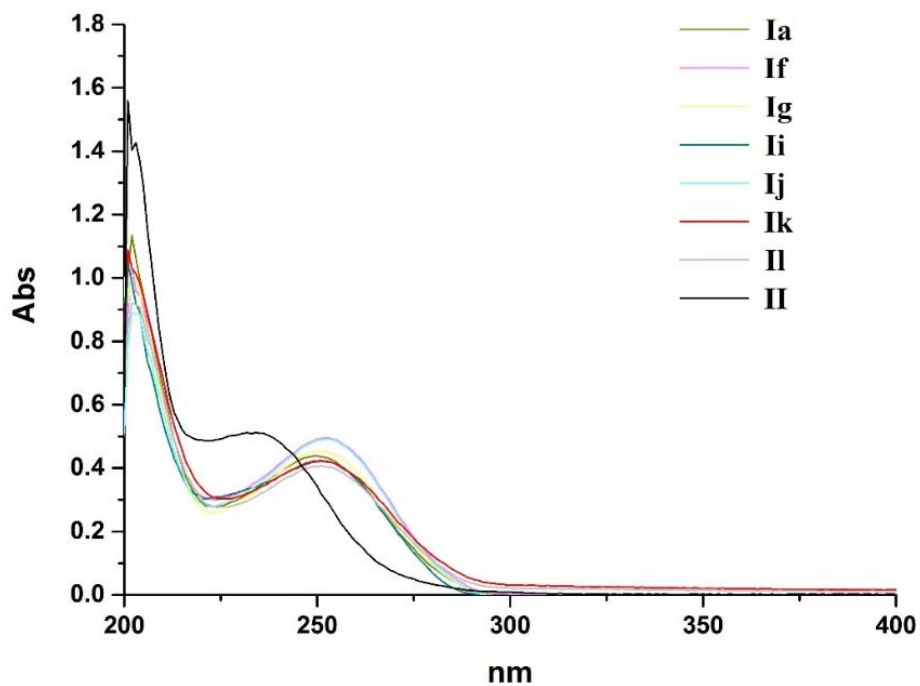

**Figure S2.** 1D NOESY spectra of **Ia**, **If**, **Ig**, **Ij** and **Ik** dissolved in CDCl<sub>3</sub> (20mg/mL) using a 800 ms NOESY mixing time was recorded on Agilent DD2 600-MR. The proton (H\*) in triazole ring was selectively irradiated and the strong NOE at 7.6 ppm (H<sub>A</sub>) and 4.0 ppm (H<sub>B</sub>) was observed.

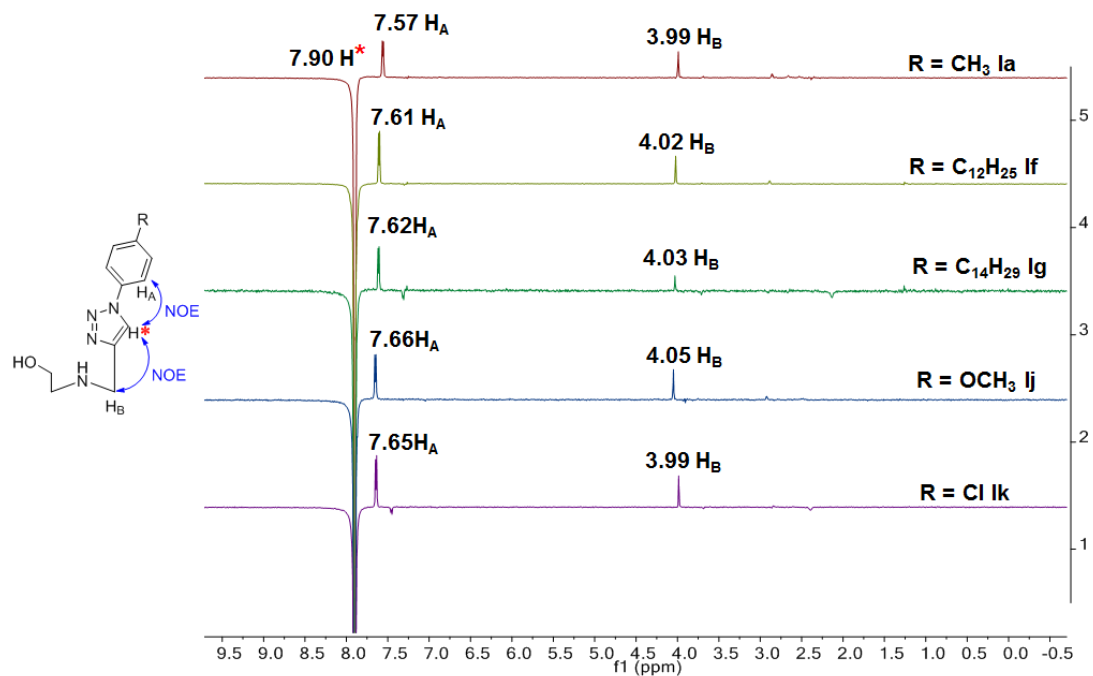

**Figure S3.** Compound **Ig** predominantly induced apoptosis in cancer cells with negligible necrosis. (A) Panc-1 cells were treated with different doses of **Ig** for 48 h and the percentage of cells undergoing apoptosis (Annexin V-positive cells) and necrosis (PI-positive cells) was determined with flow cytometry. Untreated cells were used as the reference control. (B) Compound **Ig** efficiently induced the cleavage of PARP and downregulation of BCL-2 in Panc-1 cells. BCL-2 and PARP protein levels after treatment with different concentrations of compound **Ig** were analyzed by use of western blotting, with  $\beta$ -actin as the reference. (C) Necrosis induced by different concentrations of **Ig** in Panc-1 cells was assessed by LDH assays.

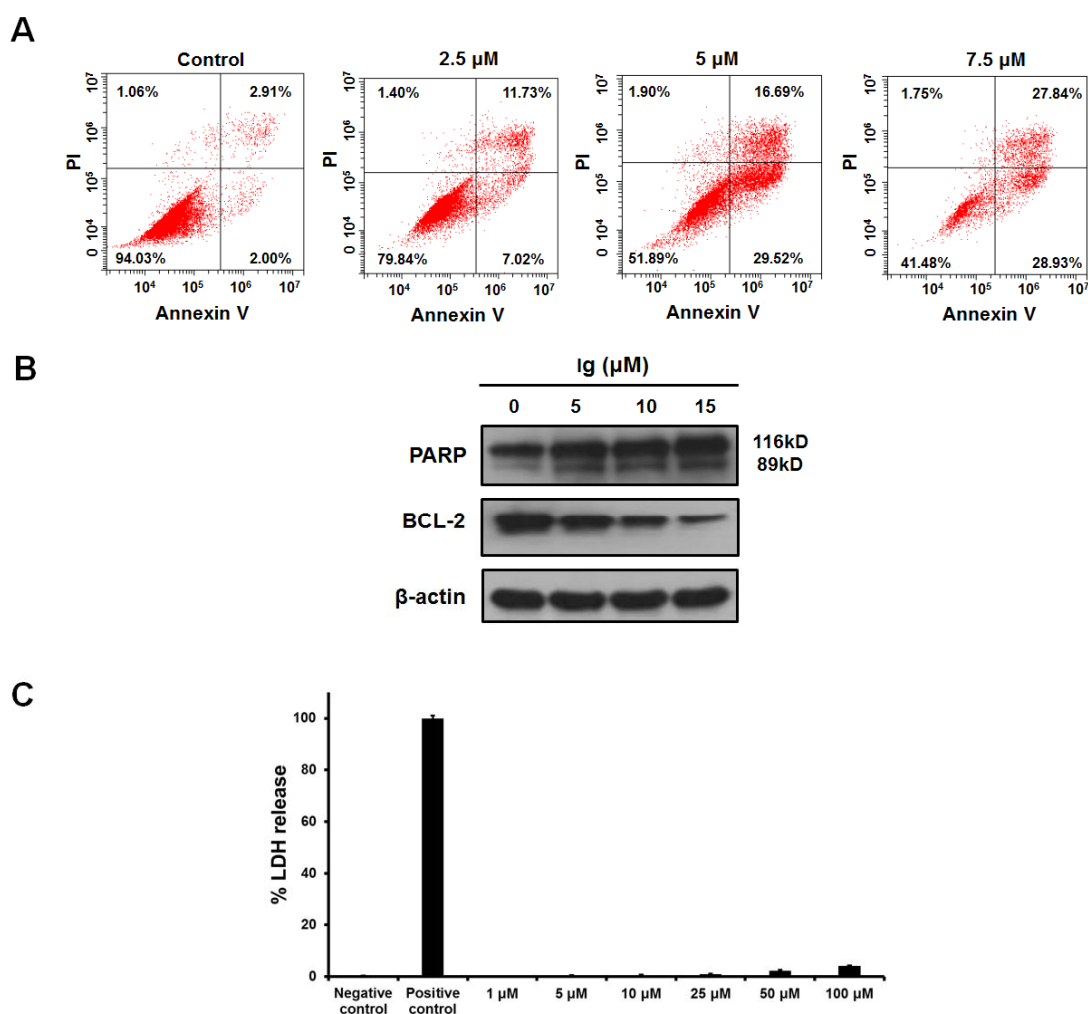

**Figure S4.** Compound **Ic** and **Ik** could not induce apoptosis or inhibit the expression of HSF1, HSP27, HSP70, HSP90 $\alpha$  and eIF4E in Panc-1 cells. (A) Panc-1 cells were treated with **Ic** and **Ik** (15 $\mu$ M) for 48 h and the percentage of cells undergoing apoptosis (Annexin V-positive cells) and necrosis (PI-positive cells) was determined with flow cytometry. Untreated cells were used as the reference control. (B) Panc-1 cells were treated with **Ic** and **Ik**. Then the BCL-2 and PARP protein levels after treatment were analyzed by western blotting, with  $\beta$ -actin as the reference. (C) Necrosis induced by different concentrations of **Ic** and **Ik** in Panc-1 cells was assessed by LDH assays. (D) Panc-1 cells were treated with **Ic** and **Ik**. Then the protein levels of HSF1, HSP27, HSP70, HSP90 $\alpha$  and eIF4E were analyzed by western blotting, with  $\beta$ -actin as the reference.

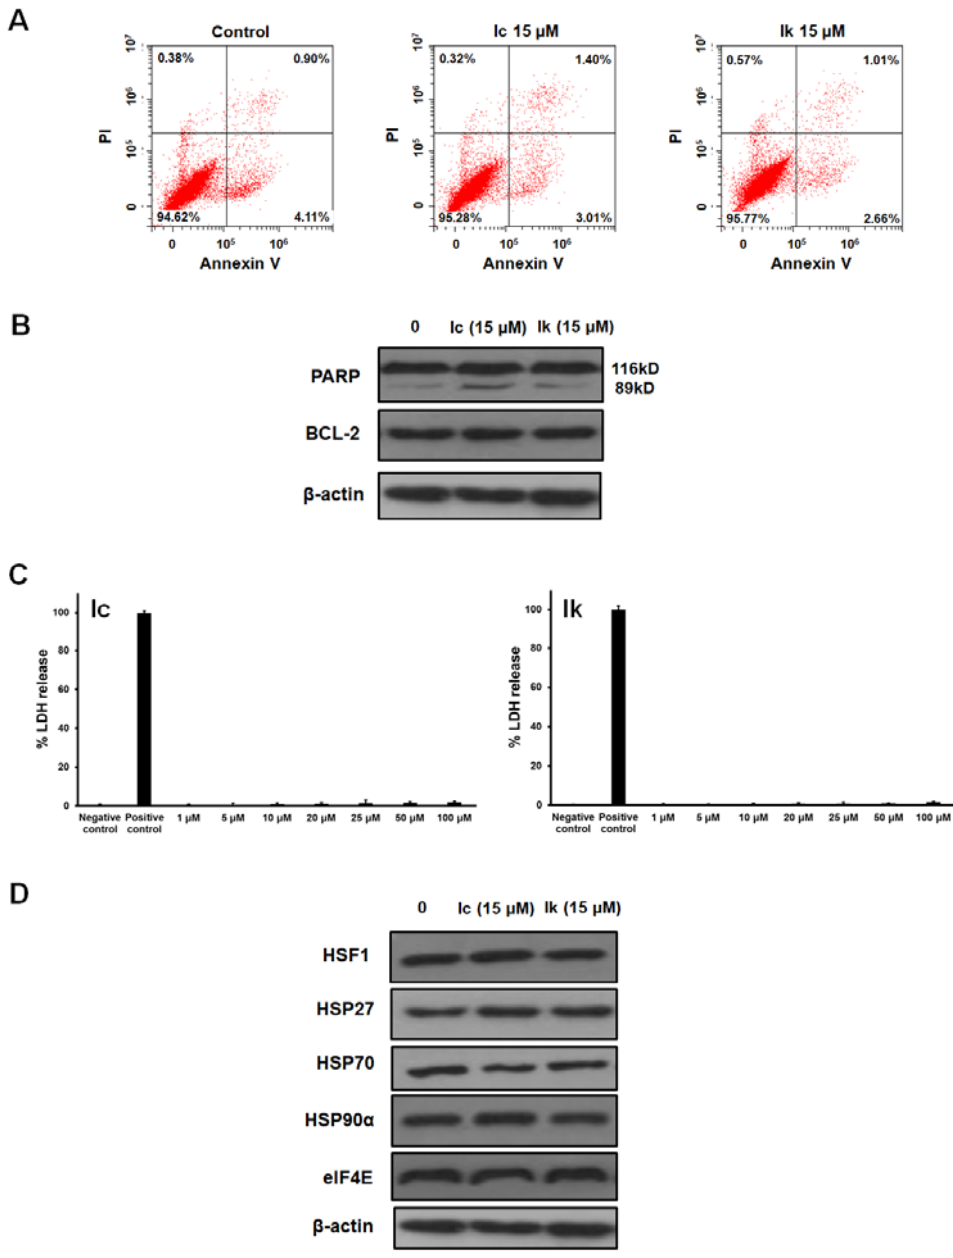

**Figure S5.** Compound **Ig** efficiently inhibited the expression of HSF1, HSP27, HSP70, HSP90 $\alpha$  and eIF4E in Panc-1 cells (B). Panc-1 cells were treated with **Ig** at indicated concentrations. Protein levels of HSF1, HSP27, HSP70, HSP90 $\alpha$  and eIF4E were then analyzed by western blotting, with  $\beta$ -actin as the reference.

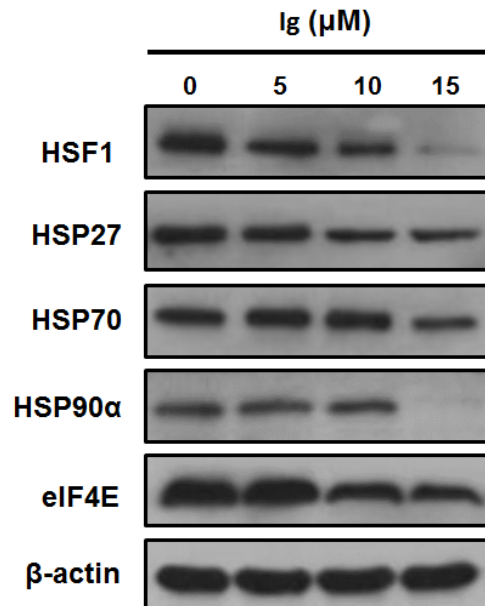

Table S1. Optimized structures and the corresponding values of the geometrical parameters for compounds **Ia-II** as obtained from Density Functional (DFT) calculations performed at the B3LYP/6-311++G(d,p) level. Molecular structures are shown as atom-colored sticks-and-balls (C, gray; O, red; N, blue; H, white; F, light cyan; Cl, light green; Br, dark red).

| Compound  | Structure                                                                           | Dihedral angle 1<br>(°) <sup>a</sup> | Dihedral angle 2<br>(°) <sup>b</sup> | H-H distance<br>(Å) <sup>c</sup> |
|-----------|-------------------------------------------------------------------------------------|--------------------------------------|--------------------------------------|----------------------------------|
| <b>Ia</b> | 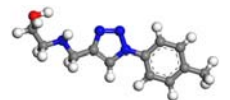   | 178.1                                | -178.2                               | 2.21                             |
| <b>Ib</b> |    | 178.7                                | -178.9                               | 2.22                             |
| <b>Ic</b> |    | 177.8                                | -177.6                               | 2.21                             |
| <b>Id</b> |   | 178.3                                | -178.1                               | 2.21                             |
| <b>Ie</b> |  | 177.4                                | -177.9                               | 2.23                             |
| <b>If</b> |  | 177.4                                | -177.2                               | 2.23                             |
| <b>Ig</b> |  | 177.3                                | -177.1                               | 2.23                             |
| <b>Ih</b> |  | 177.2                                | -177.3                               | 2.23                             |
| <b>Ii</b> |  | 178.4                                | -178.9                               | 2.27                             |
| <b>Ij</b> |  | 179.0                                | -178.6                               | 2.24                             |
| <b>Ik</b> |  | 178.6                                | -178.6                               | 2.33                             |



|                                                                                                                       |                                                                                   |                                          |                                           |                                                                                     |
|-----------------------------------------------------------------------------------------------------------------------|-----------------------------------------------------------------------------------|------------------------------------------|-------------------------------------------|-------------------------------------------------------------------------------------|
| <p style="text-align: center;"><b>II</b></p>                                                                          | 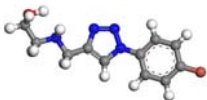 | <p style="text-align: center;">178.9</p> | <p style="text-align: center;">-178.4</p> | <p style="text-align: center;">2.27</p>                                             |
| <p><sup>a</sup>Atoms involved in dihedral angle 1 (N2-C6-C7-C8) are shown in orange for <b>Ik</b> as an example</p>   |                                                                                   |                                          |                                           |  |
| <p><sup>b</sup>Atoms involved in dihedral angle 2 (N2-C6-C11-C10) are shown in orange for <b>Ik</b> as an example</p> |                                                                                   |                                          |                                           |  |
| <p><sup>c</sup>Atoms involved in H-H distance are shown in orange for <b>Ik</b> as an example</p>                     |                                                                                   |                                          |                                           |  |

Table S2. Comparison between experimental (X-ray) and calculated (B3LYP/6-311++G(d,p)) values of the main structural parameters for compound **Ik**. The first row shows the X-ray derived (left) and DFT-optimized (right) molecular structure of **Ik** (atom color code: C, gray; O, red; N, blue; Cl, light green; H, white).

| 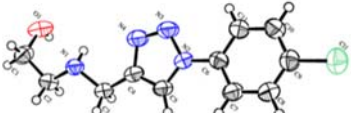 |              |            |  |              |            |
|-----------------------------------------------------------------------------------|--------------|------------|------------------------------------------------------------------------------------|--------------|------------|
| Atoms                                                                             | Experimental | Calculated | Atoms                                                                              | Experimental | Calculated |
| <b>Bond length (Å)</b>                                                            |              |            | <b>Bond length (Å)</b>                                                             |              |            |
| C11-C9                                                                            | 1.742(5)     | 1.76(0)    | C6-C7                                                                              | 1.378(6)     | 1.39(0)    |
| N2-N3                                                                             | 1.347(5)     | 1.35(1)    | N4-C4                                                                              | 1.363(6)     | 1.36(1)    |
| N2-C6                                                                             | 1.426(5)     | 1.44(2)    | C5-C4                                                                              | 1.356(6)     | 1.36(0)    |
| N2-N5                                                                             | 1.352(6)     | 1.35(8)    | C3-C4                                                                              | 1.483(6)     | 1.49(0)    |
| O1-C1                                                                             | 1.408(6)     | 1.41(0)    | C10-C9                                                                             | 1.377(6)     | 1.37(3)    |
| N1-C3                                                                             | 1.465(5)     | 1.48(4)    | C10-C11                                                                            | 1.386(7)     | 1.38(2)    |
| N1-C2                                                                             | 1.460(5)     | 1.48(3)    | C9-C8                                                                              | 1.362(7)     | 1.37(3)    |
| N3-N4                                                                             | 1.315(6)     | 1.33(0)    | C2-C1                                                                              | 1.512(6)     | 1.52(3)    |
| C6-C11                                                                            | 1.385(6)     | 1.39(2)    | C7-C8                                                                              | 1.372(7)     | 1.38(1)    |
| <b>Bond angle (°)</b>                                                             |              |            | <b>Bond angle (°)</b>                                                              |              |            |
| N3-N2-C6                                                                          | 120.6(4)     | 120.5(1)   | C5-C4-N4                                                                           | 107.5(4)     | 108.8(2)   |
| N3-N2-C5                                                                          | 109.7(4)     | 108.5(7)   | C5-C4-C3                                                                           | 130.3(4)     | 129.6(9)   |
| C5-N2-C6                                                                          | 129.7(4)     | 130.8(9)   | C9-C10-C11                                                                         | 118.7(5)     | 119.9(7)   |
| C2-N1-C3                                                                          | 111.5(4)     | 111.8(6)   | C10-C9-Cl21                                                                        | 118.7(4)     | 119.9(6)   |
| N4-N3-N2                                                                          | 107.3(4)     | 107.9(3)   | C8-C9-C11                                                                          | 120.3(4)     | 120.0(3)   |
| C11-C6-N2                                                                         | 119.4(4)     | 119.8(1)   | C8-C9-C10                                                                          | 121.1(4)     | 120.0(1)   |
| C7-C6-N2                                                                          | 120.3(4)     | 120.1(4)   | N1-C2-C1                                                                           | 110.1(4)     | 112.3(4)   |
| C7-C6-C11                                                                         | 120.3(4)     | 120.0(4)   | C6-C11-C10                                                                         | 120.0(4)     | 119.9(8)   |
| N3-N4-C4                                                                          | 109.4(4)     | 107.4(4)   | C8-C7-C6                                                                           | 119.2(5)     | 119.9(9)   |
| N2-C5-C4                                                                          | 106.2(4)     | 107.2(0)   | C9-C8-C7                                                                           | 120.6(4)     | 120.0(0)   |
| N1-C3-C4                                                                          | 111.5(4)     | 111.7(3)   | O1-C1-C2                                                                           | 111.6(4)     | 112.3(2)   |
| N4-C4-C3                                                                          | 122.1(4)     | 121.3(1)   |                                                                                    |              |            |
| <b>Torsion angle (°)</b>                                                          |              |            | <b>Torsion angle (°)</b>                                                           |              |            |
| Cl11-C9-C8-C7                                                                     | -177.5(4)    | -179.3(9)  | C6-N2-N3-N4                                                                        | 178.2(3)     | 178.8(1)   |
| N2-N3-N4-C4                                                                       | -0.5(6)      | -0.4(8)    | C6-N2-C5-C4                                                                        | -177.9(4)    | -178.0(9)  |
| N2-C6-C11-C10                                                                     | -178.3(4)    | -178.6(1)  | C6-C7-C8-C9                                                                        | 0.5(7)       | 0.08(9)    |
| N2-C6-C7-C8                                                                       | 177.4(4)     | 178.6(7)   | C5-N2-N3-N4                                                                        | 1.0(6)       | 0.5(1)     |
| N2-C5-C4-N4                                                                       | 0.7(5)       | 0.8(4)     | C5-N2-C6-C11                                                                       | 164.2(5)     | 165.1(0)   |
| N2-C5-C4-C3                                                                       | 177.7(4)     | 176.3(2)   | C5-N2-C6-C7                                                                        | -15.1(6)     | -15.6(8)   |
| N1-C3-C4-N4                                                                       | -21.6(6)     | -23.2(5)   | C3-N1-C2-C1                                                                        | -167.2(4)    | -168.1(3)  |
| N1-C3-C4-C5                                                                       | 161.8(4)     | 161.5(3)   | C10-C9-C8-C7                                                                       | 1.7(7)       | 0.6(4)     |
| N1-C2-C1-O1                                                                       | 58.5(5)      | 58.7(5)    | C9-C10-C11-C6                                                                      | 1.2(7)       | 0.7(4)     |

|              |           |           |                |          |          |
|--------------|-----------|-----------|----------------|----------|----------|
| N3-N2-C6-C11 | -12.4(6)  | -13.2(0)  | C2-N1-C3-C4    | 172.4(3) | 171.4(4) |
| N3-N2-C6-C7  | 168.4(5)  | 166.0(2)  | C11-C6-C7- C8  | -1.8(7)  | -0.5(5)  |
| N3-N2-C5-C4  | -1.1(5)   | -0.9(8)   | C11-C10-C9-C11 | 176.7(4) | 179.4(6) |
| N3-N4-C4-C5  | -0.1(6)   | -0.094(4) | C11-C10-C 9-C8 | -2.5(7)  | -0.5(8)  |
| N3-N4-C4-C3  | -177.4(4) | -176.7(0) | C7-C6-C11-C10  | 1.0(7)   | 0.6(1)   |

**Table S3.** *In silico* predicted main pharmacokinetic parameters of compounds **Ia-II**.

| Cpd.      | MW <sup>a</sup> | HBA <sup>b</sup> | HBD <sup>c</sup> | logP <sup>d</sup> | logS <sup>e</sup> | PSA <sup>f</sup> | BBB score <sup>g</sup> | Rule of 5 violation | Drug likeness |
|-----------|-----------------|------------------|------------------|-------------------|-------------------|------------------|------------------------|---------------------|---------------|
| Rule of 5 | <500            | ≤10              | ≤5               | ≤5                | ≤5                | -                | -                      | ≤1                  | -             |
| <b>Ia</b> | 232.13          | 4                | 2                | 0.83              | -0.94             | 55.63            | 4.44                   | 0                   | -0.53         |
| <b>Ib</b> | 260.16          | 4                | 2                | 1.81              | -1.41             | 55.63            | 4.59                   | 0                   | -0.47         |
| <b>Ic</b> | 288.20          | 4                | 2                | 2.86              | -2.99             | 55.63            | 4.69                   | 0                   | -0.37         |
| <b>Id</b> | 316.23          | 4                | 2                | 3.87              | -3.85             | 55.63            | 4.76                   | 0                   | -0.37         |
| <b>Ie</b> | 358.27          | 4                | 2                | 5.39              | -5.32             | 55.63            | 4.79                   | <b>1</b>            | -0.37         |
| <b>If</b> | 386.30          | 4                | 2                | 6.40              | -6.04             | 55.63            | 4.78                   | <b>1</b>            | -0.37         |
| <b>Ig</b> | 414.34          | 4                | 2                | 7.41              | -6.12             | 55.63            | 4.74                   | <b>1</b>            | -0.37         |
| <b>Ih</b> | 442.37          | 4                | 2                | 8.43              | -6.23             | 55.63            | 4.70                   | <b>1</b>            | -0.37         |
| <b>Ii</b> | 286.10          | 4                | 2                | 1.33              | -1.13             | 55.63            | 4.69                   | 0                   | -0.82         |
| <b>Ij</b> | 284.13          | 5                | 2                | 0.35              | -1.44             | 63.18            | 4.06                   | 0                   | -0.42         |
| <b>Ik</b> | 252.08          | 4                | 2                | 0.98              | -1.60             | 55.63            | 4.54                   | 0                   | -0.20         |
| <b>II</b> | 286.03          | 4                | 2                | 1.23              | -0.91             | 55.63            | 4.71                   | 0                   | -0.62         |

<sup>a</sup>Molecular weight; <sup>b</sup>number of hydrogen bond acceptors; <sup>c</sup>number of hydrogen bond donors; <sup>d</sup>logarithm of n-octanol/water partition coefficient; <sup>e</sup>logarithm of water solubility (in log(mol/L)); <sup>f</sup>polar surface area; <sup>g</sup>Blood-brain barrier score: 6 = High; 0 = low.

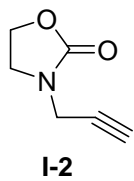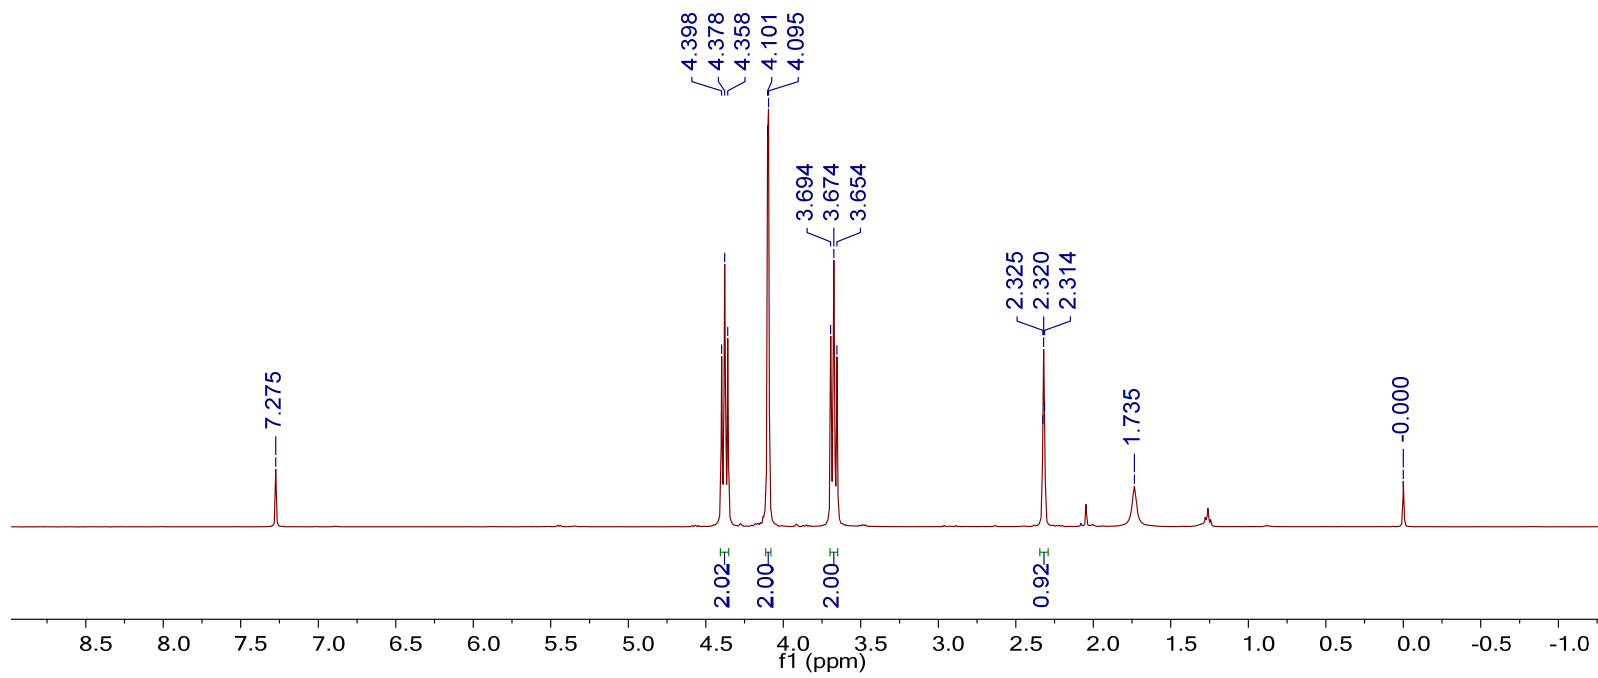

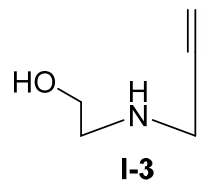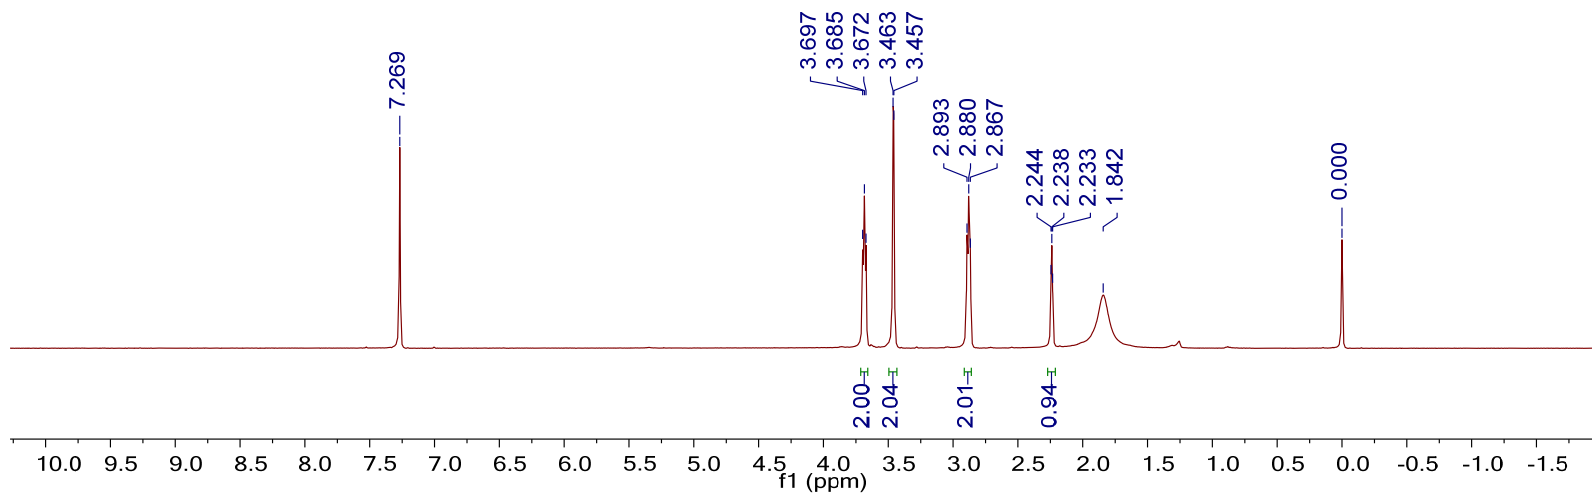

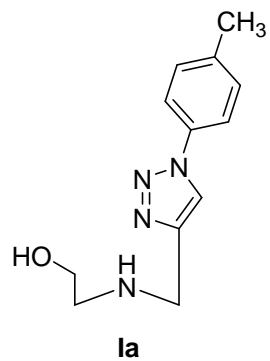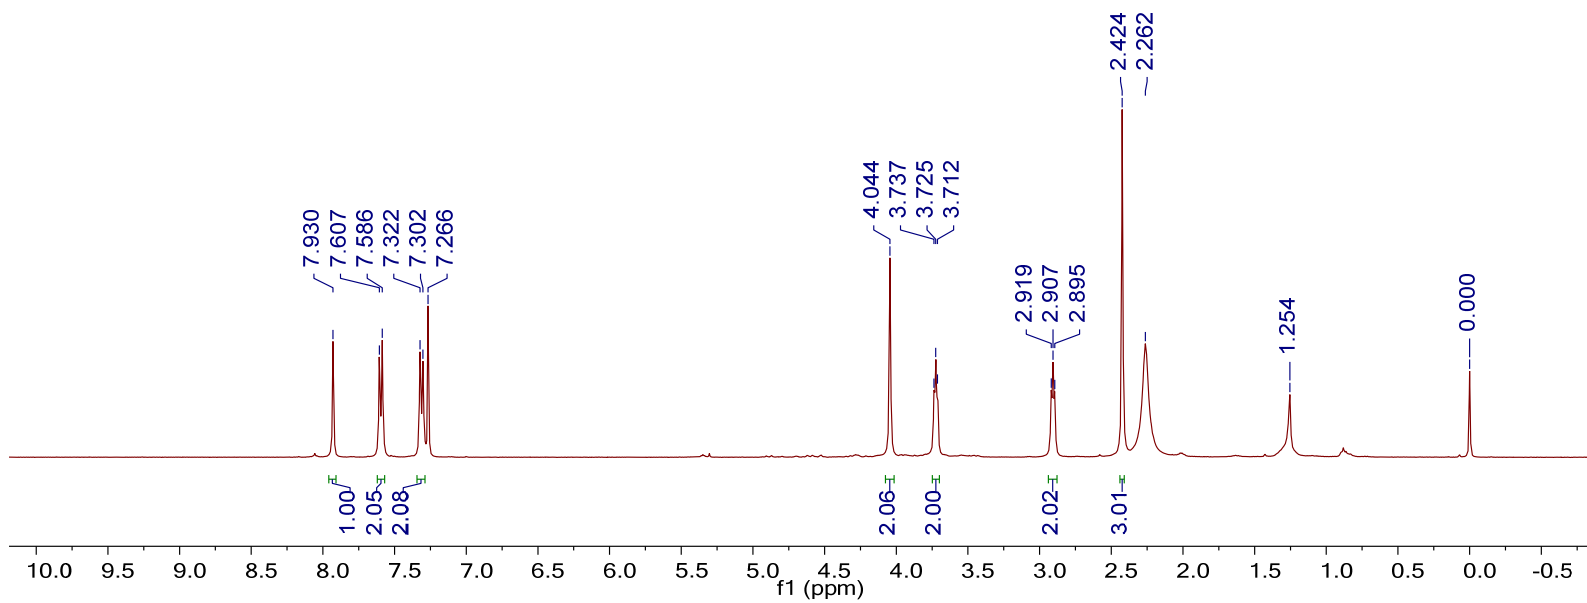

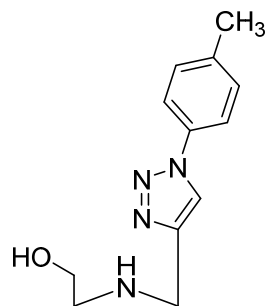

**1a**

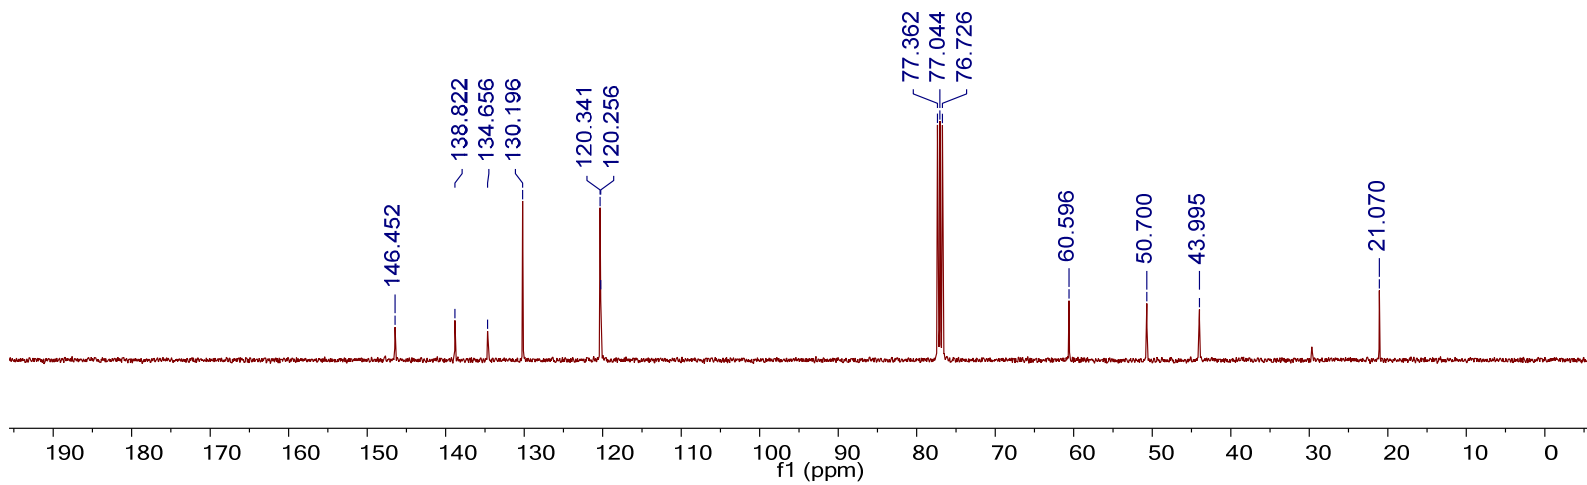



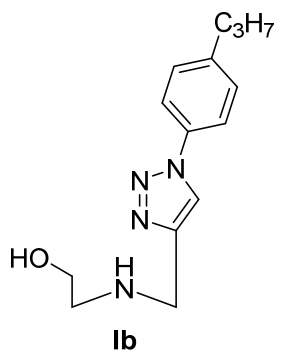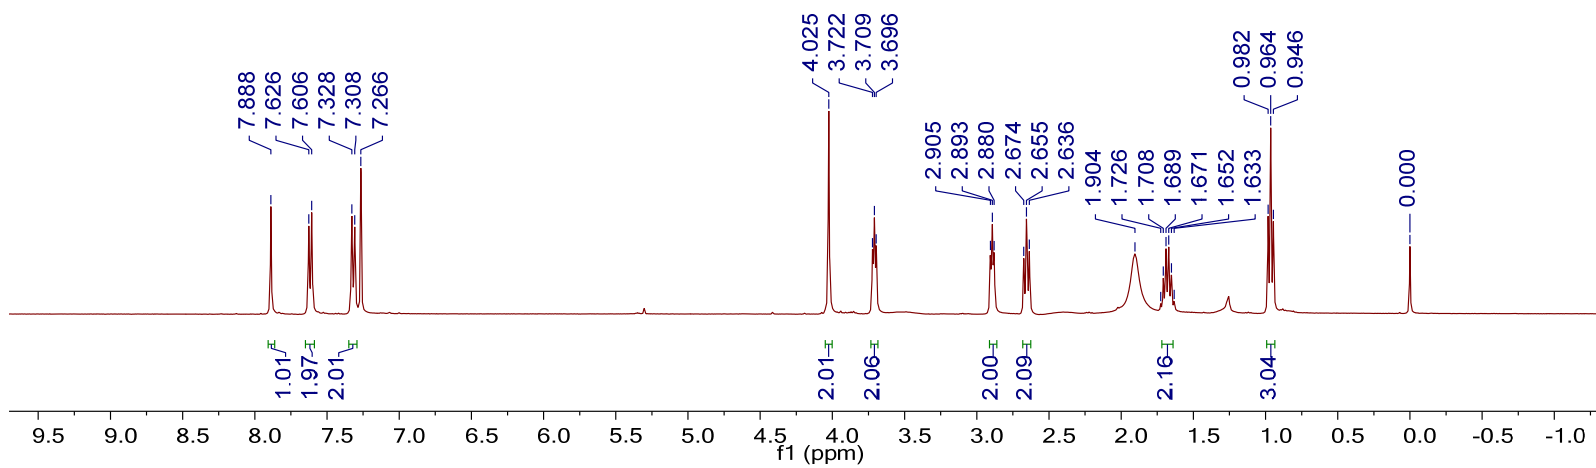

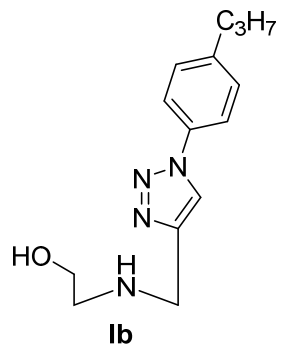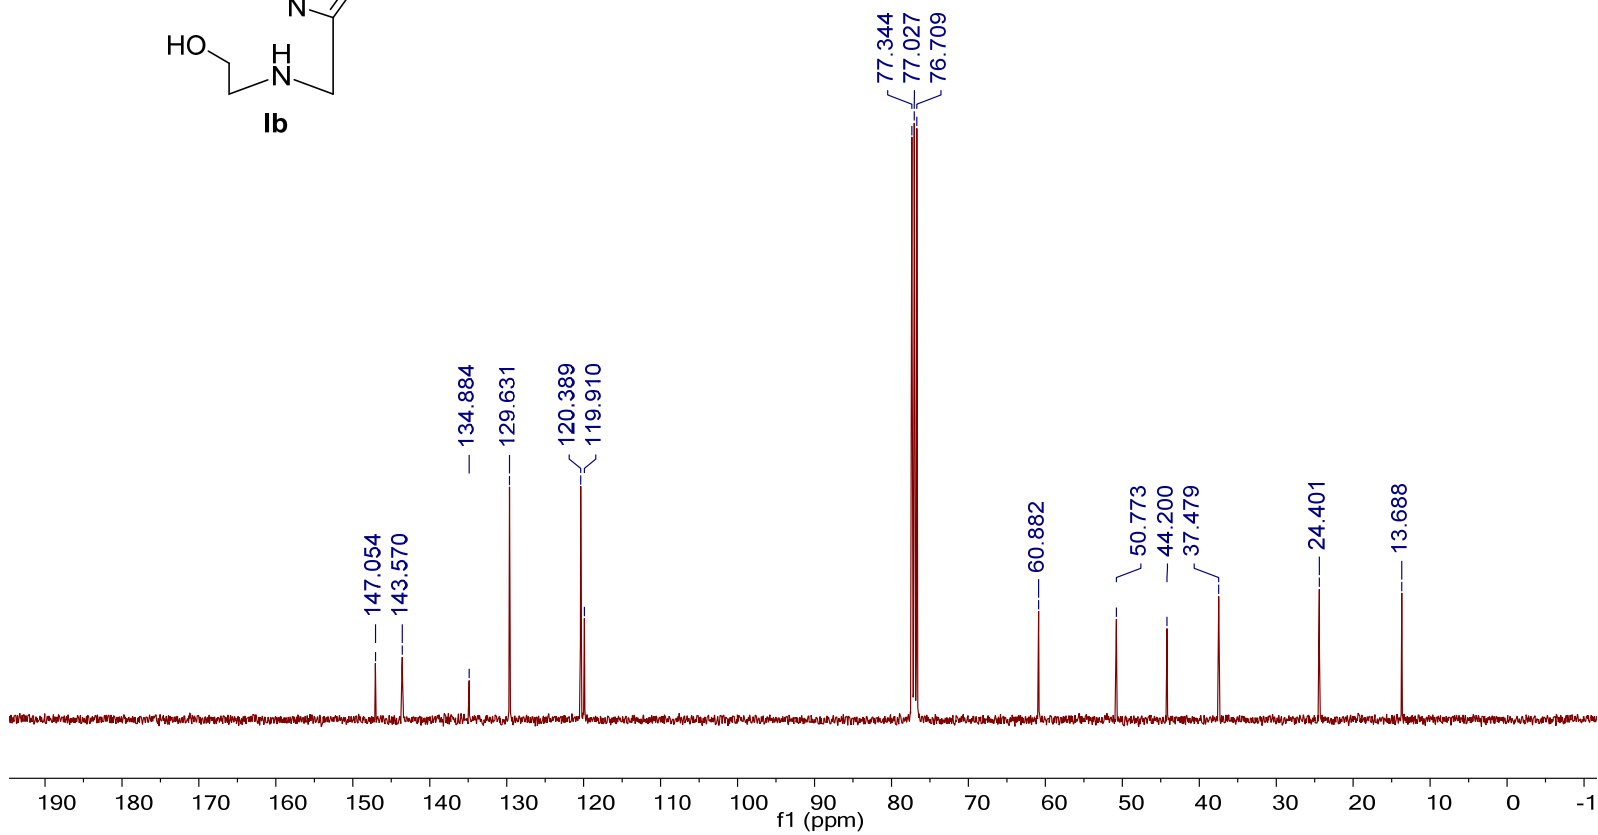

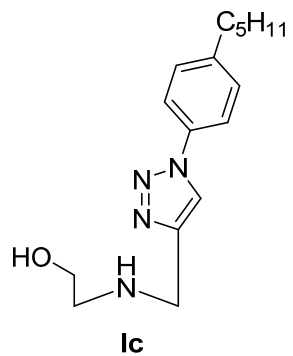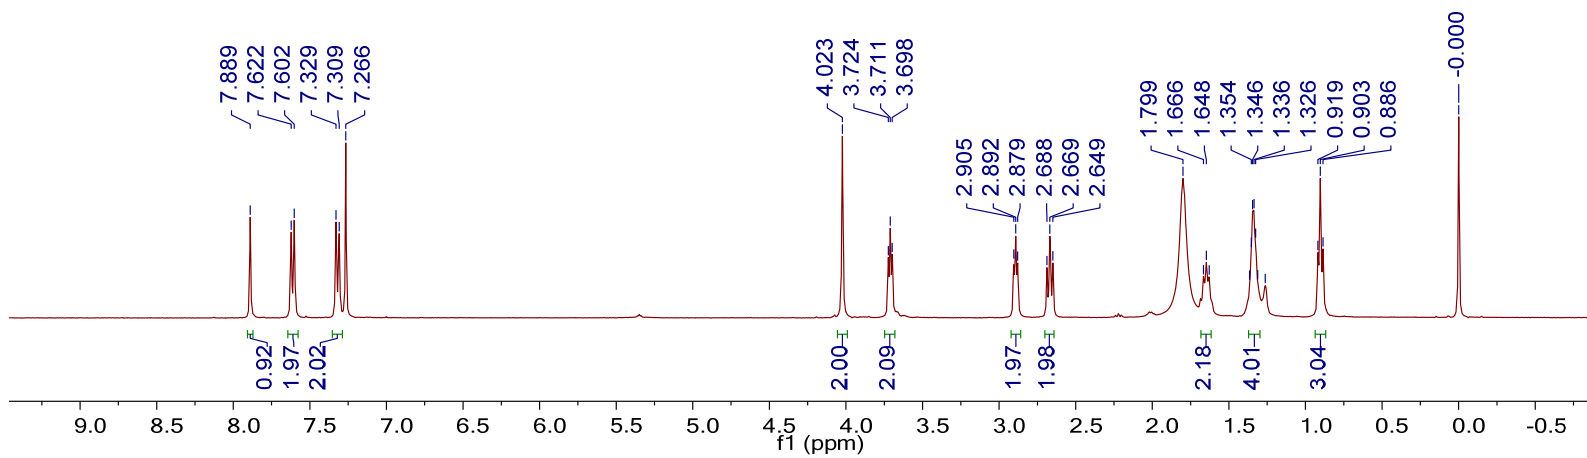

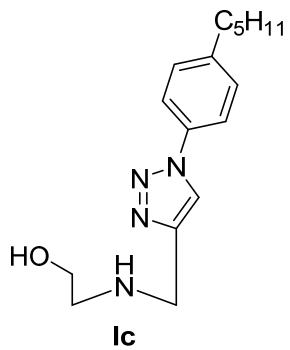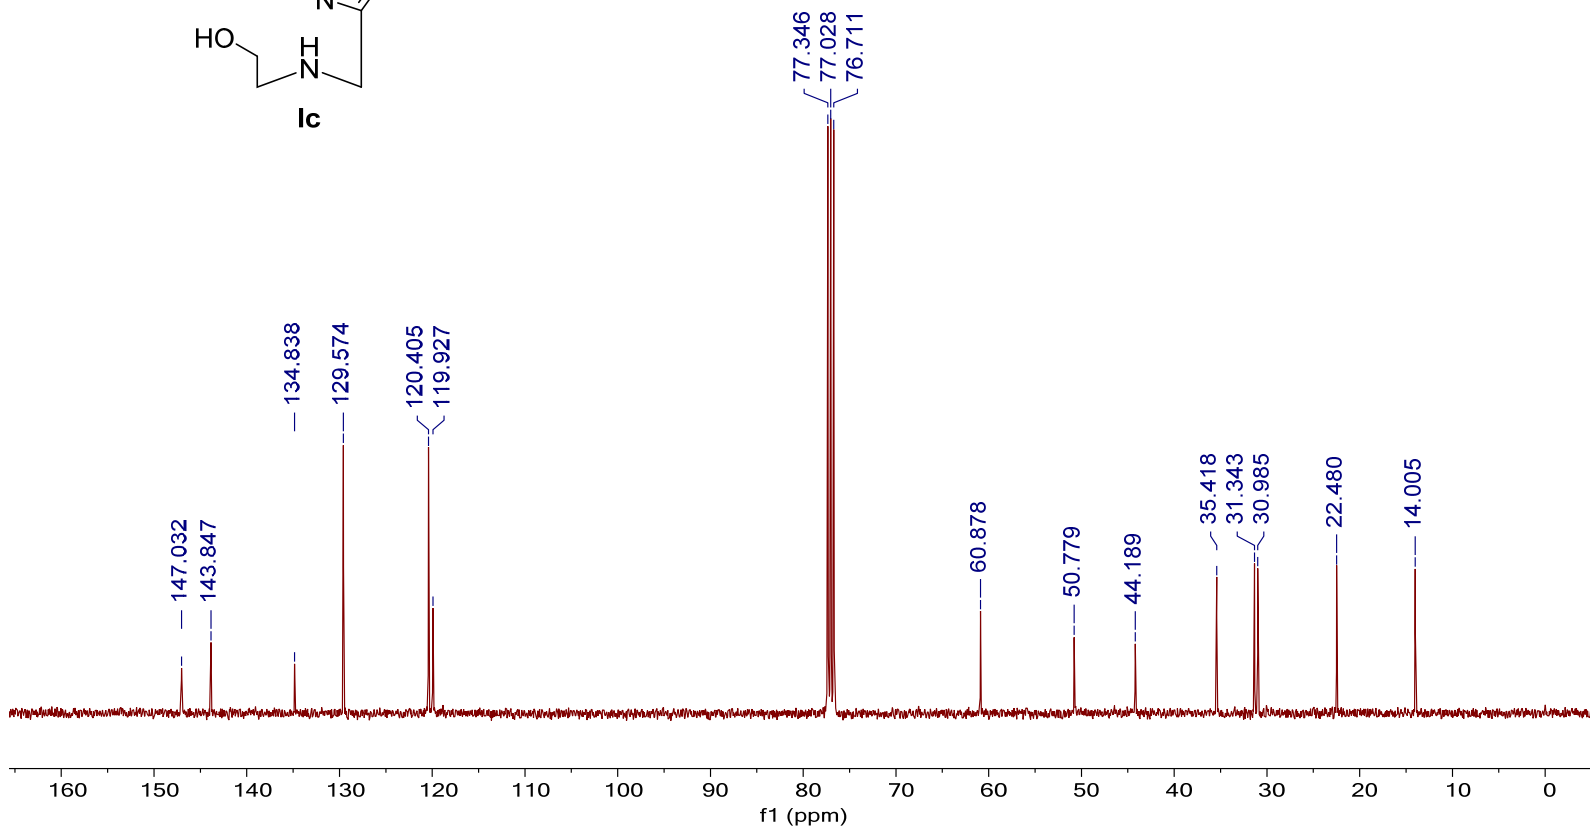

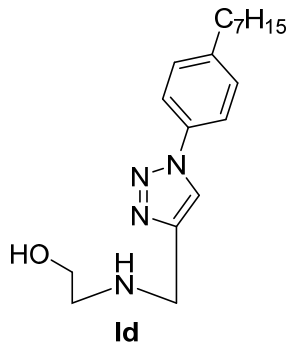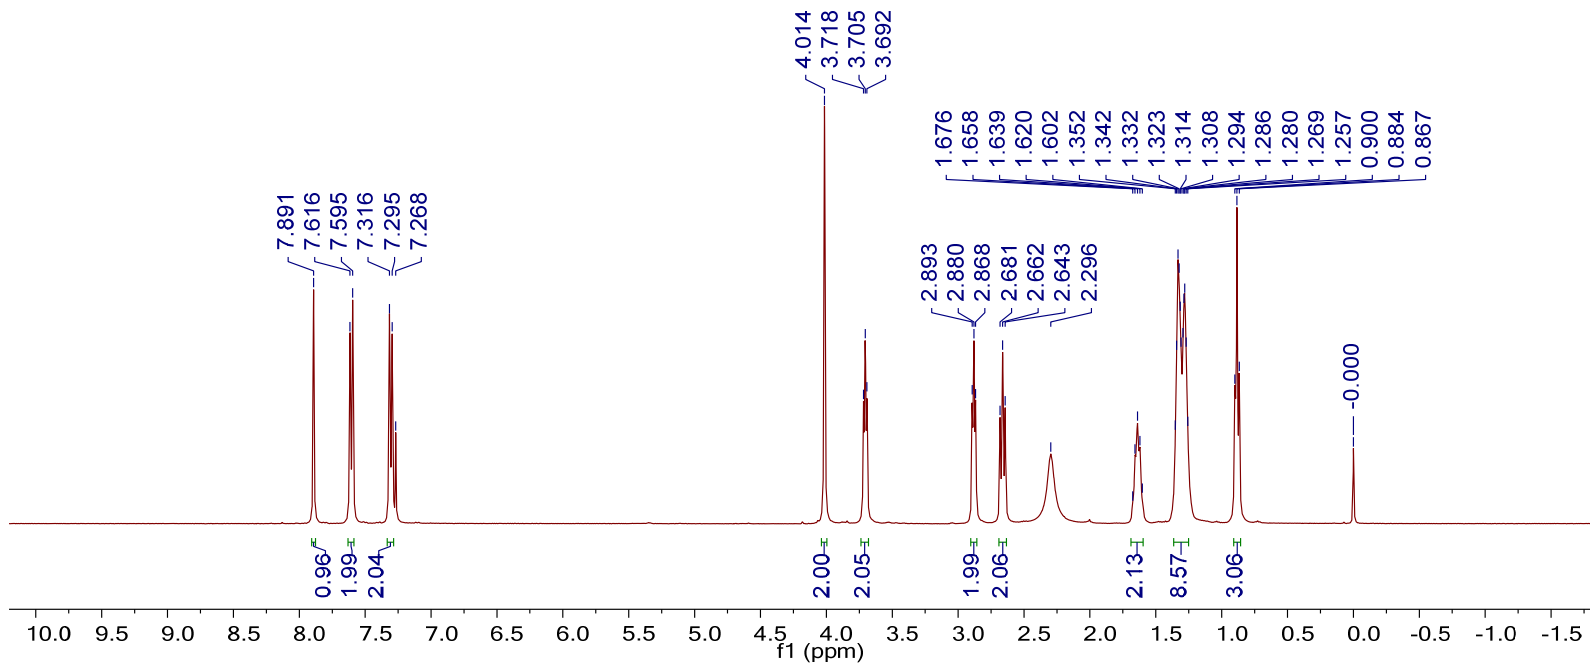

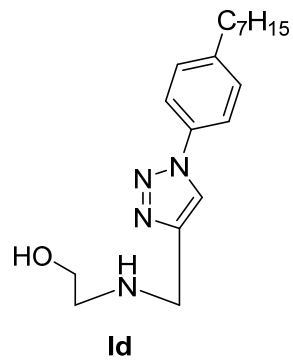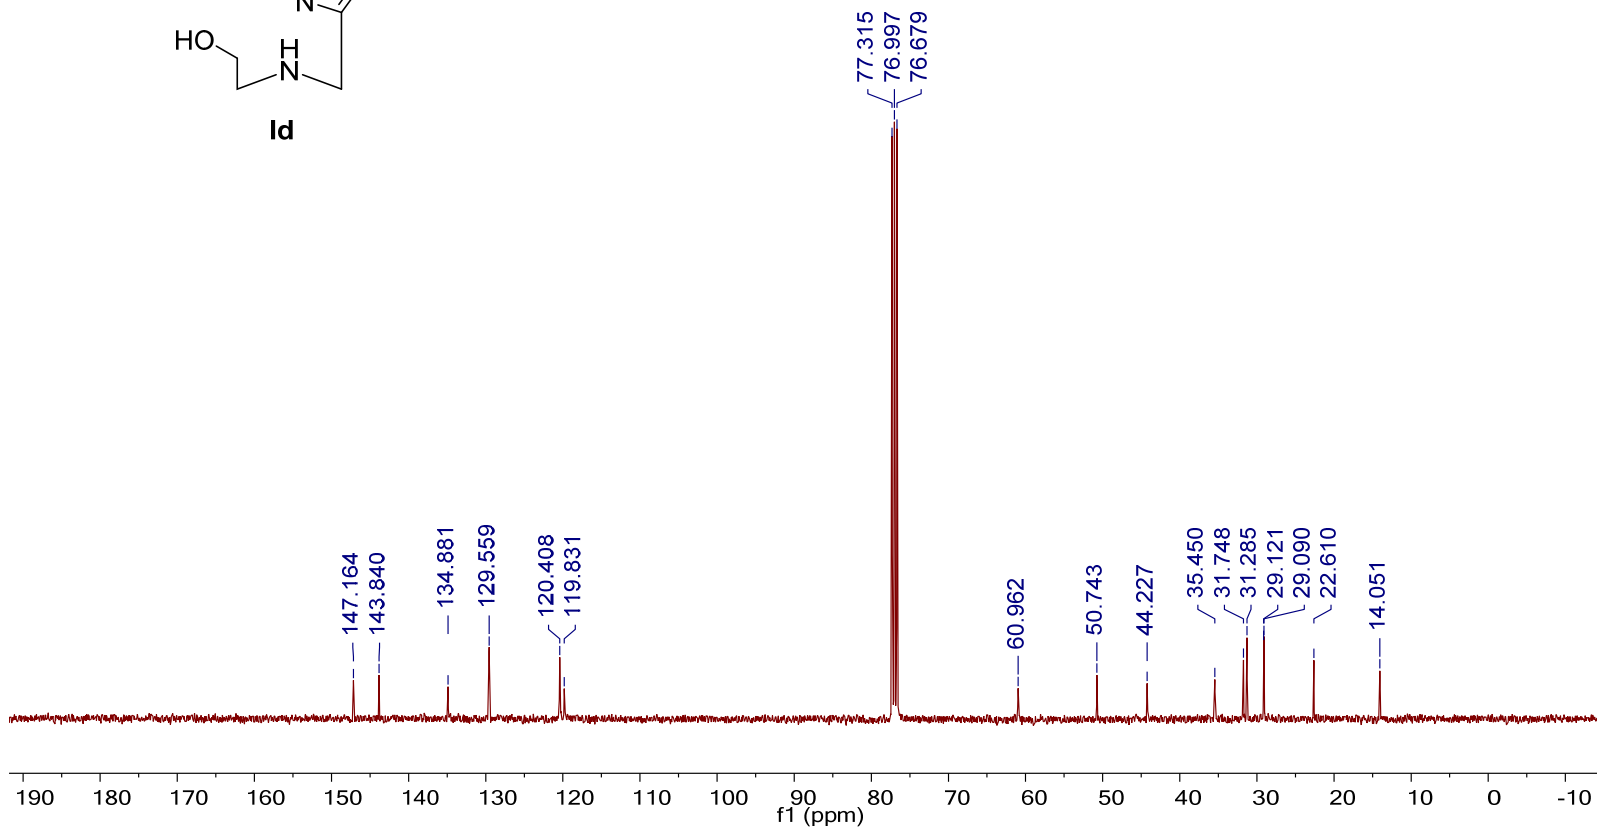

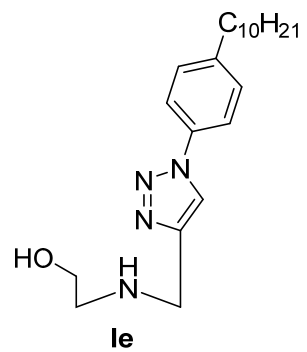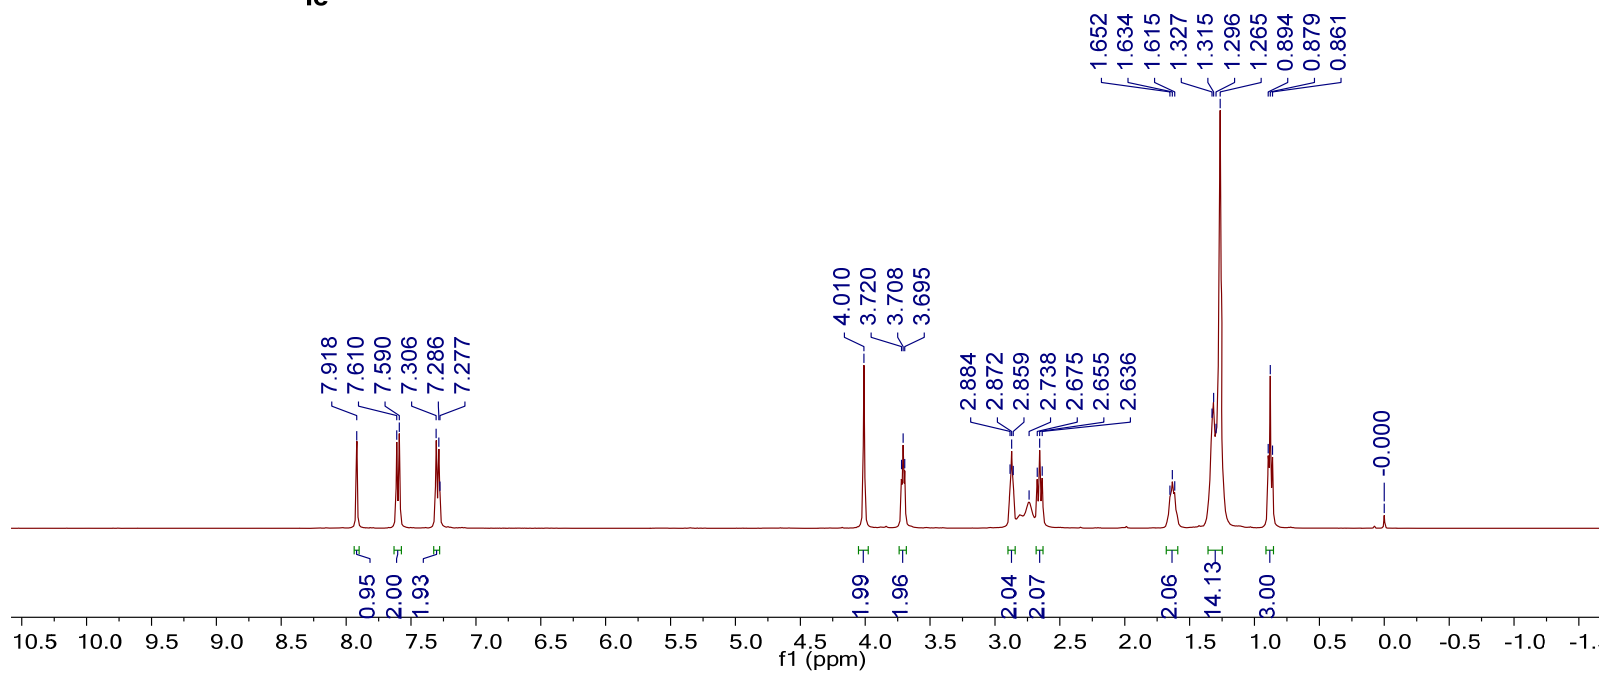

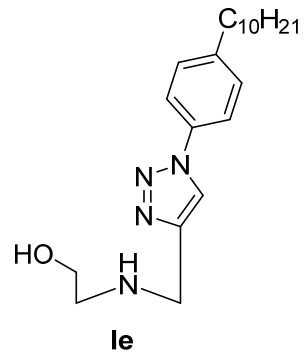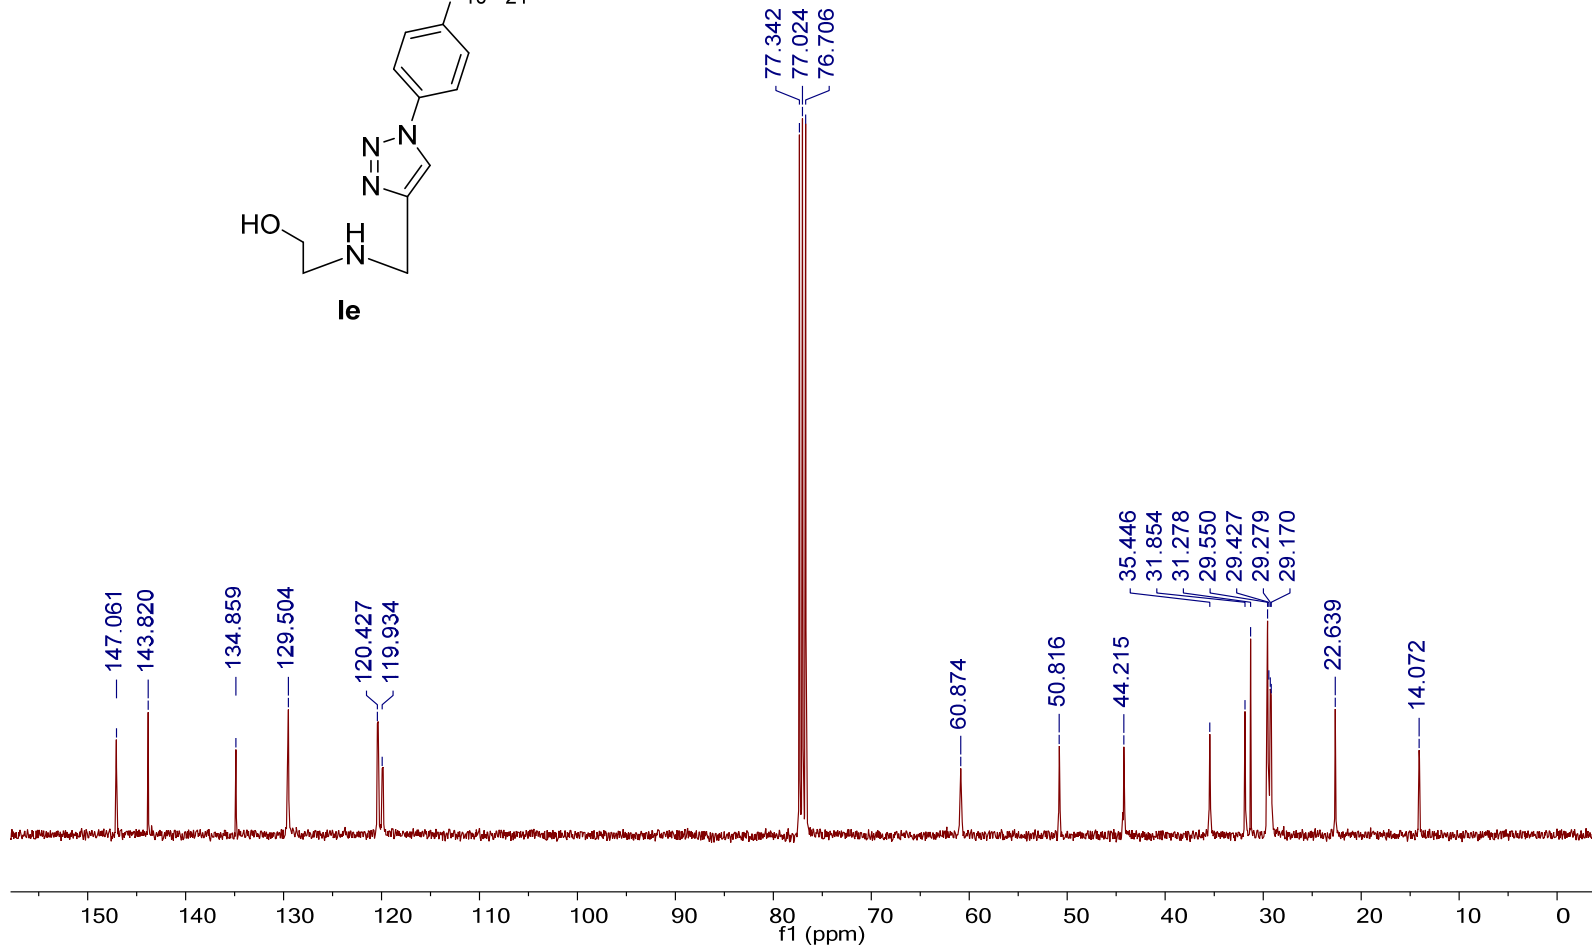



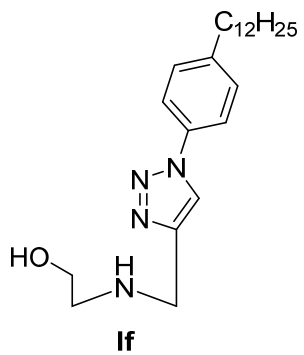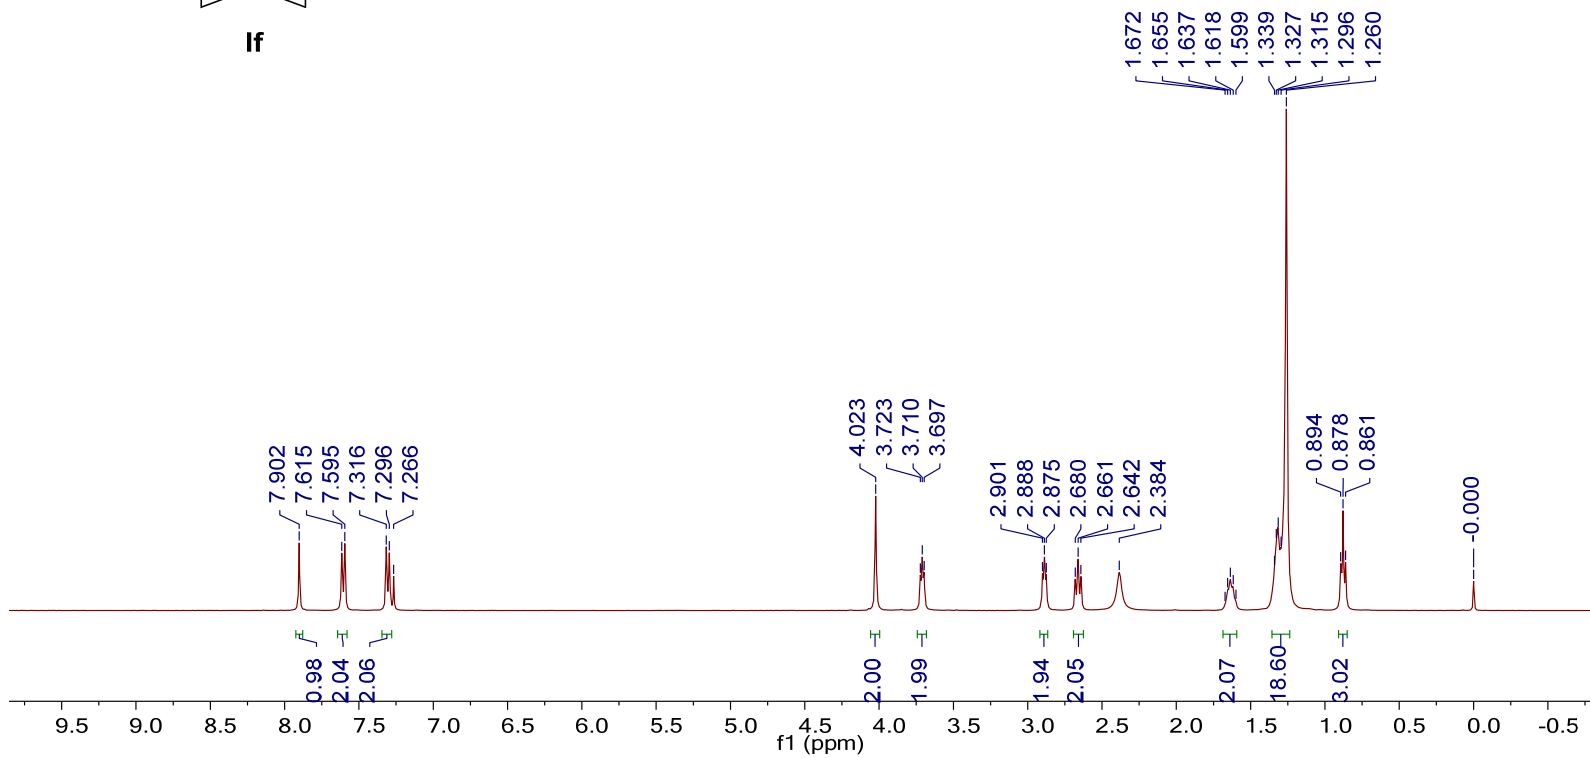

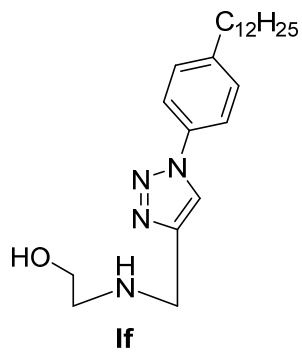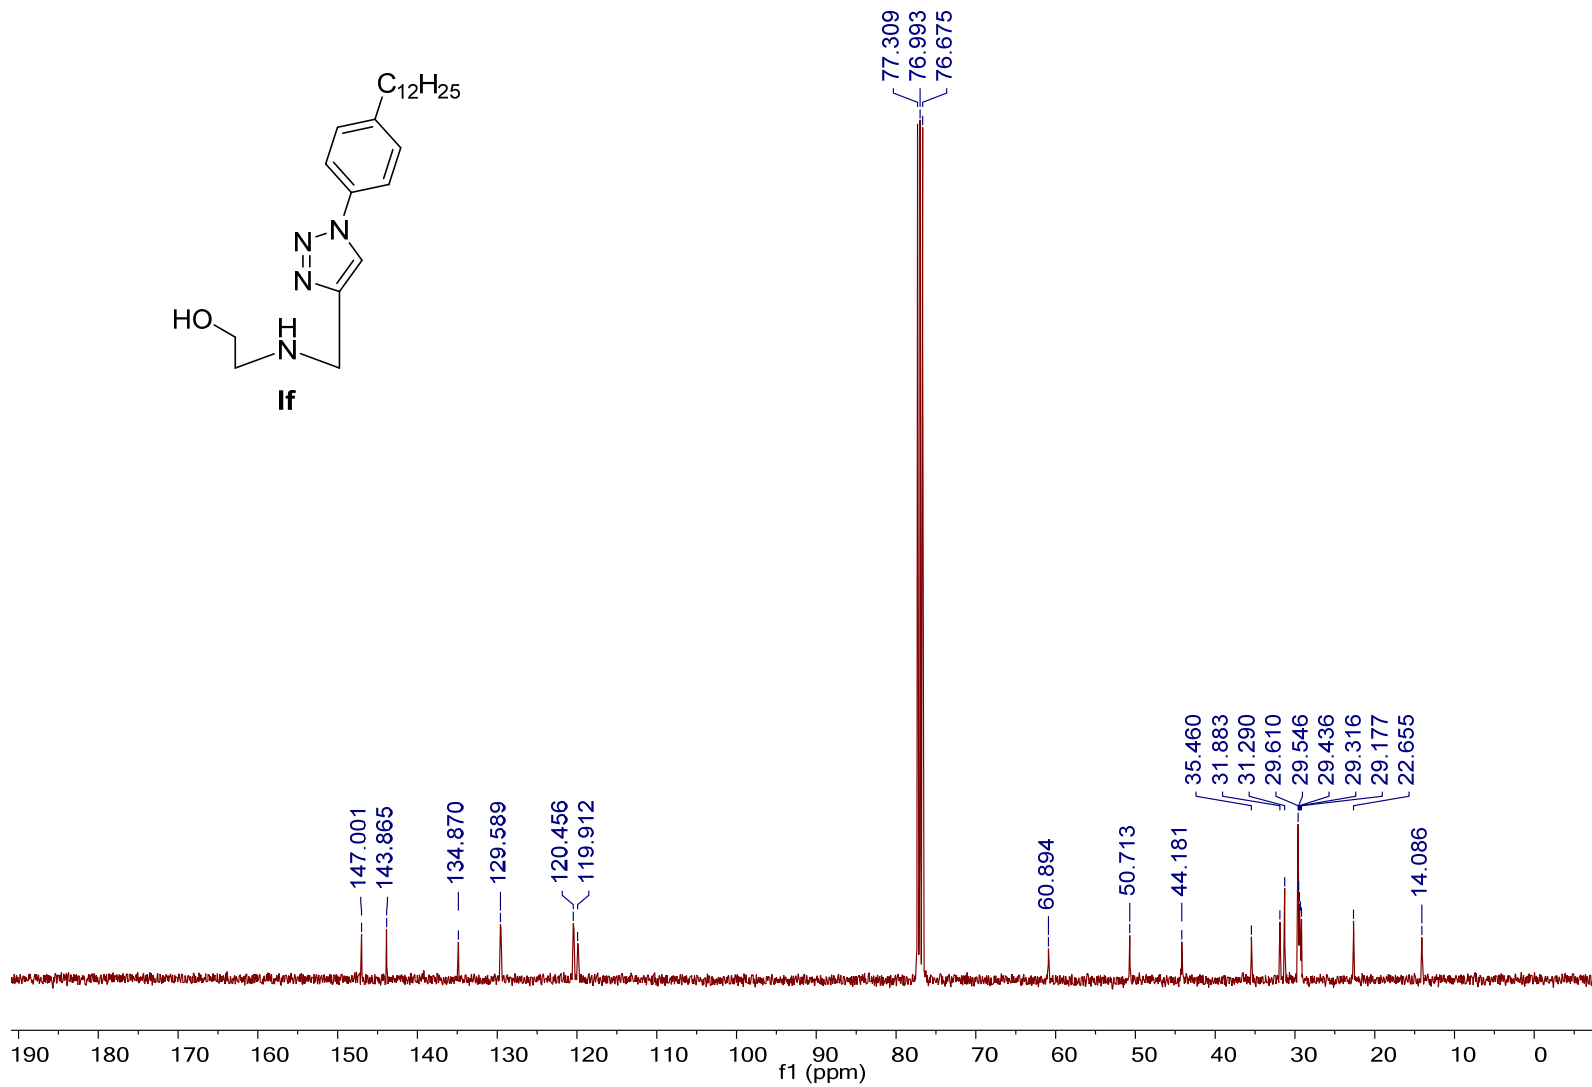

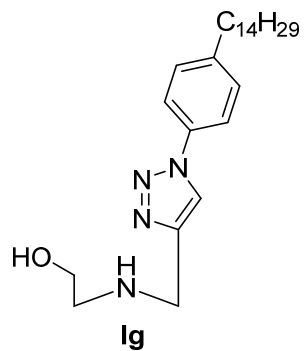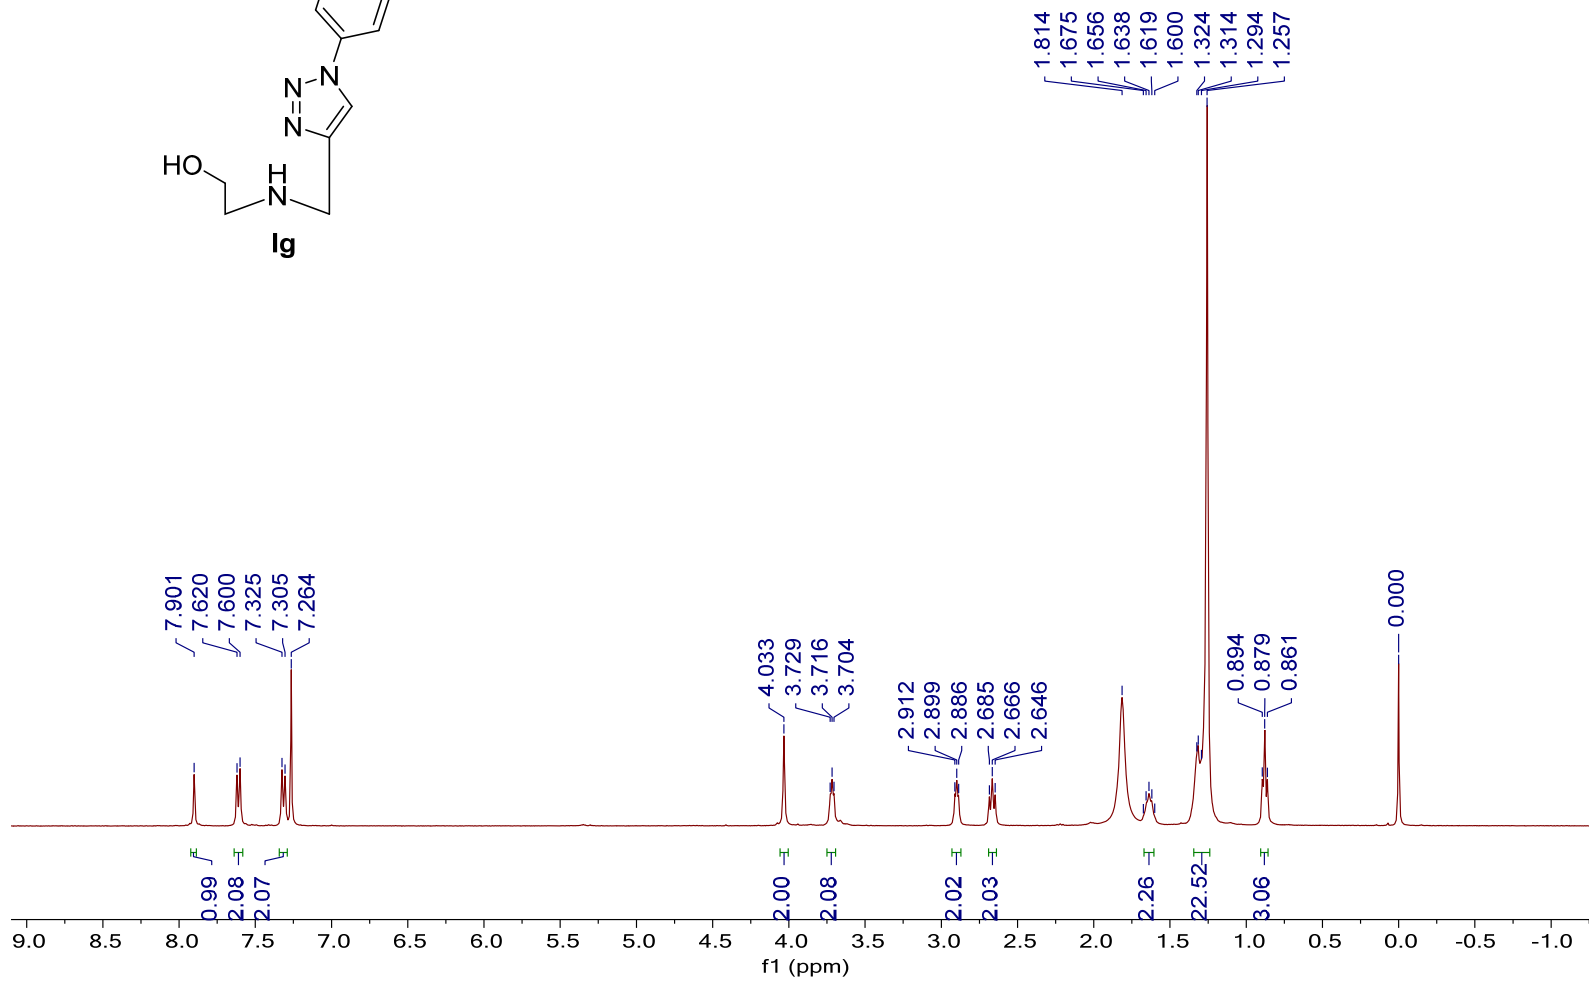

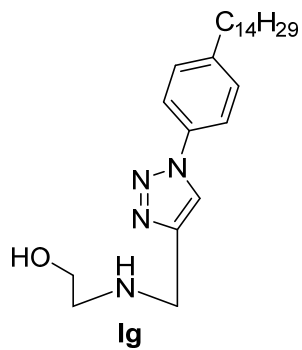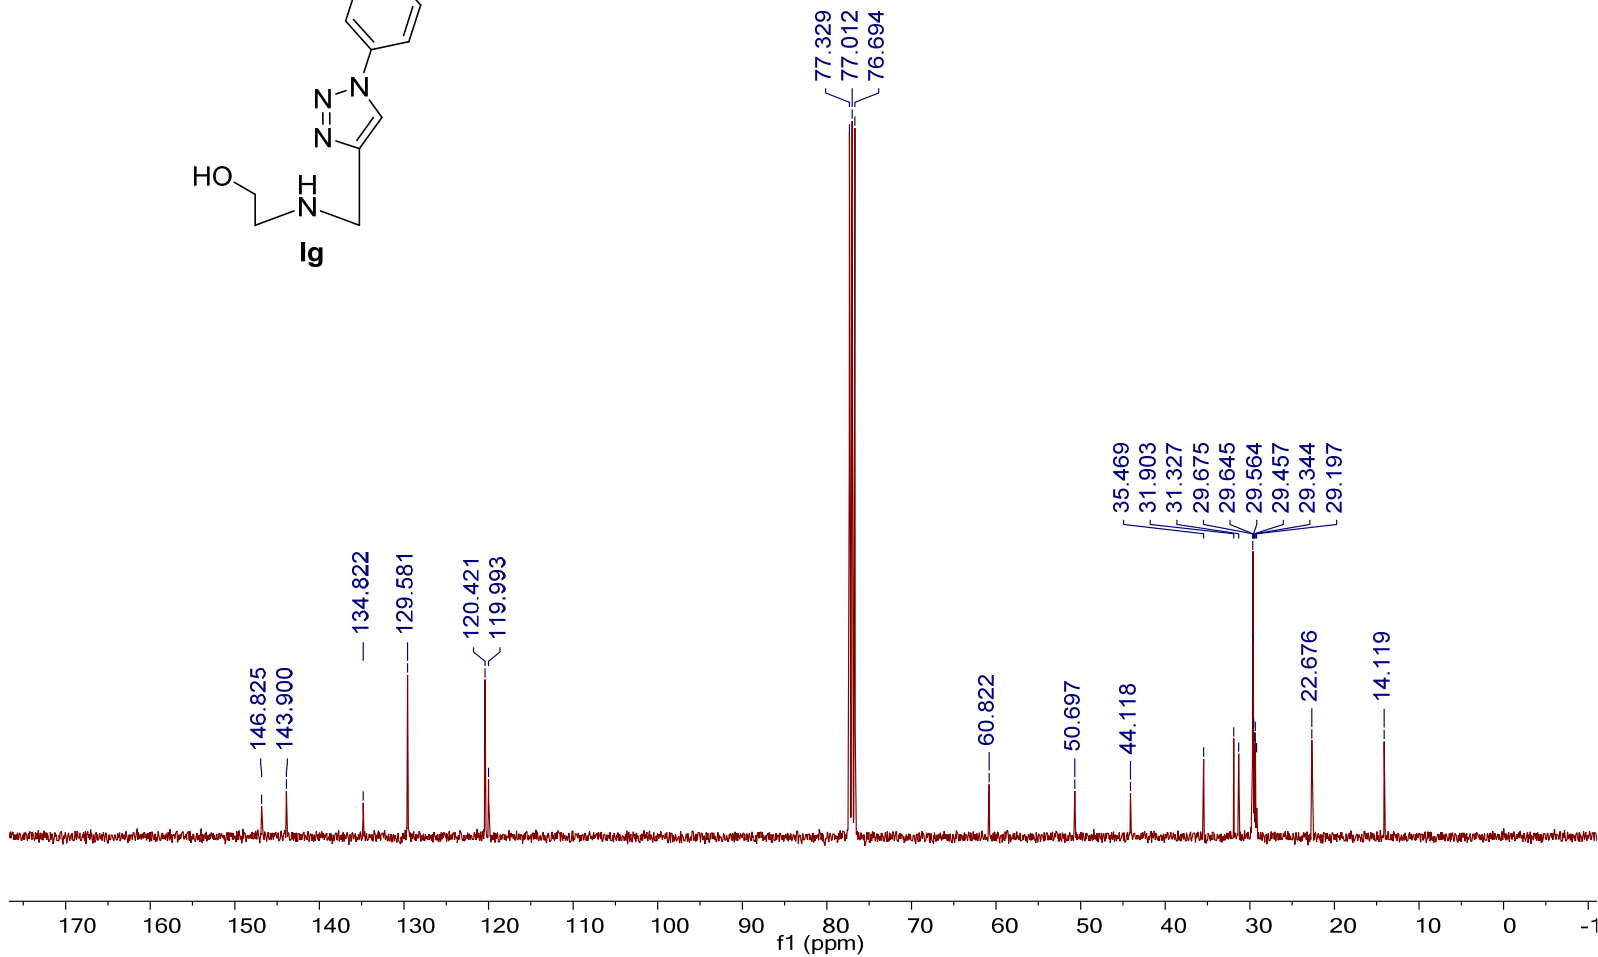

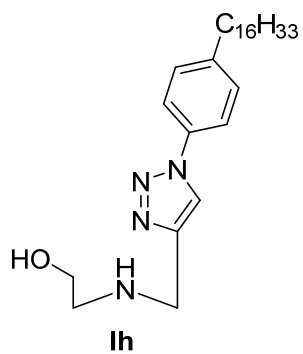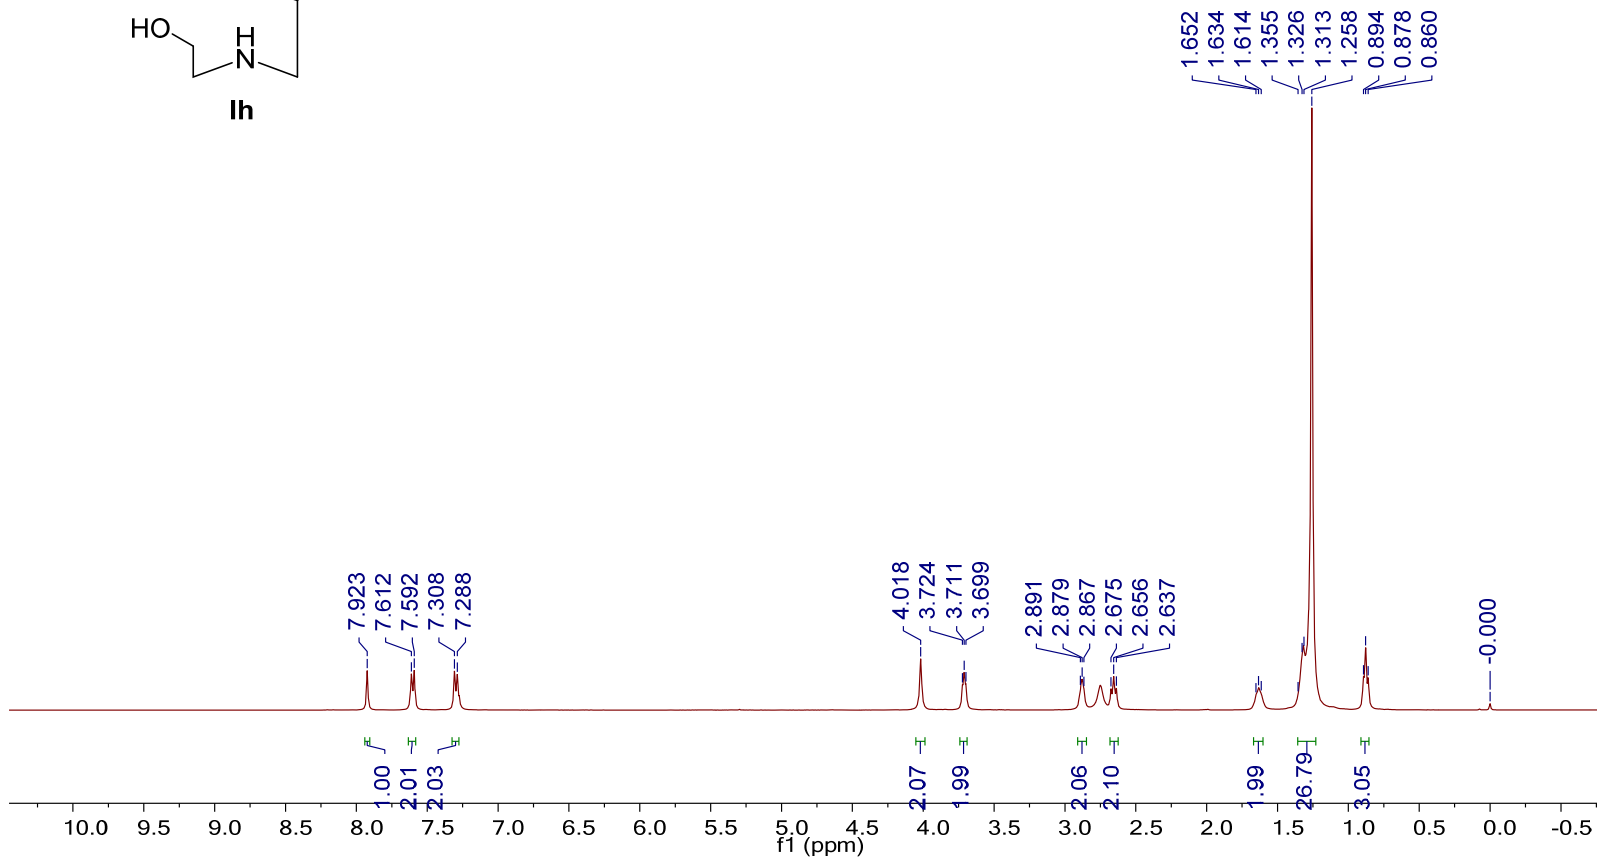

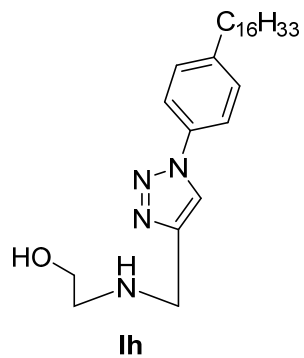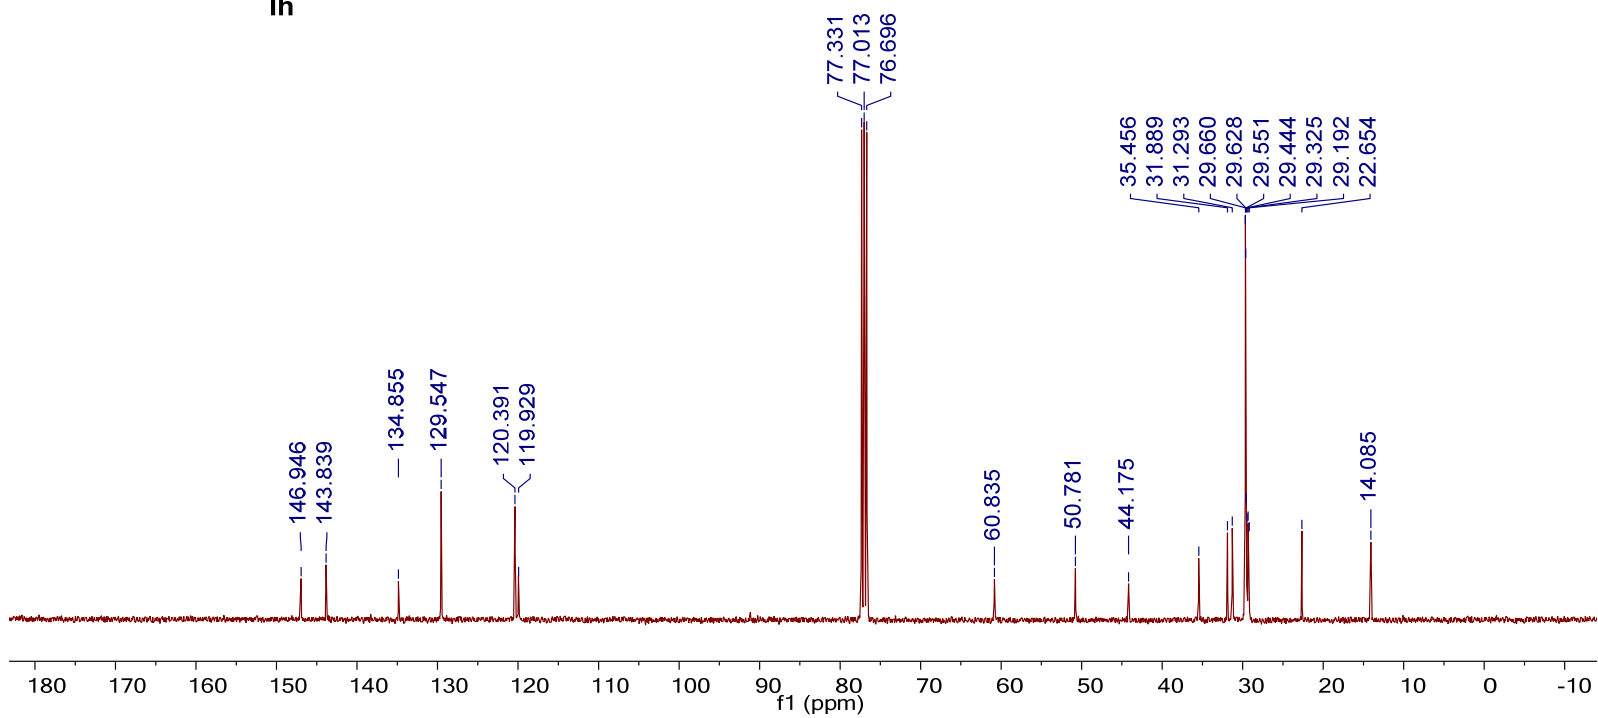

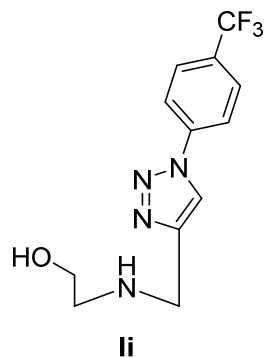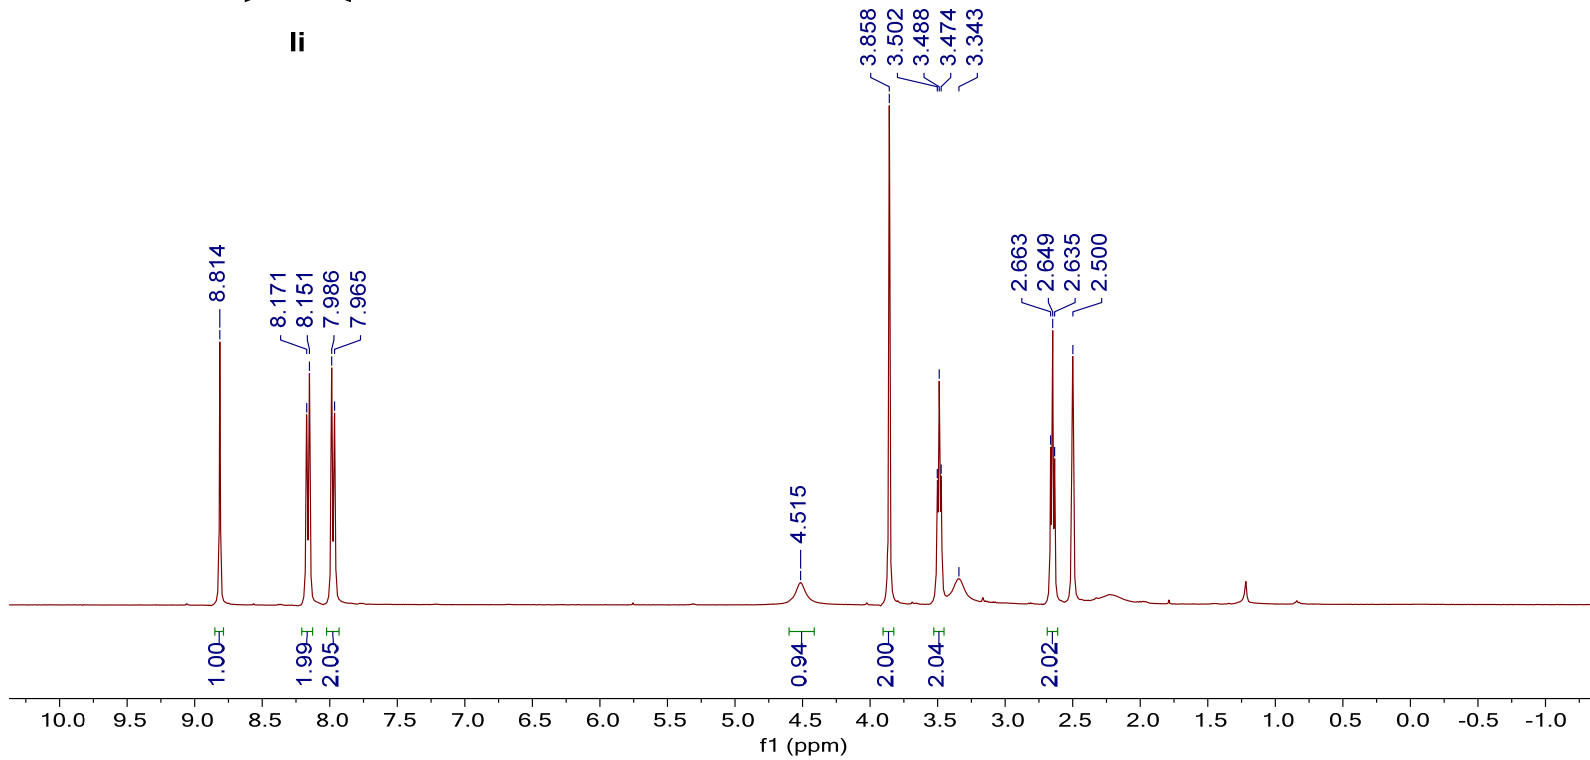

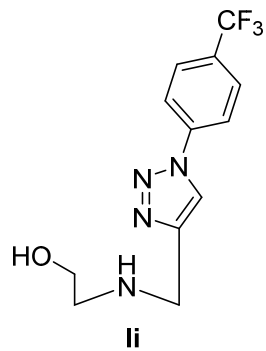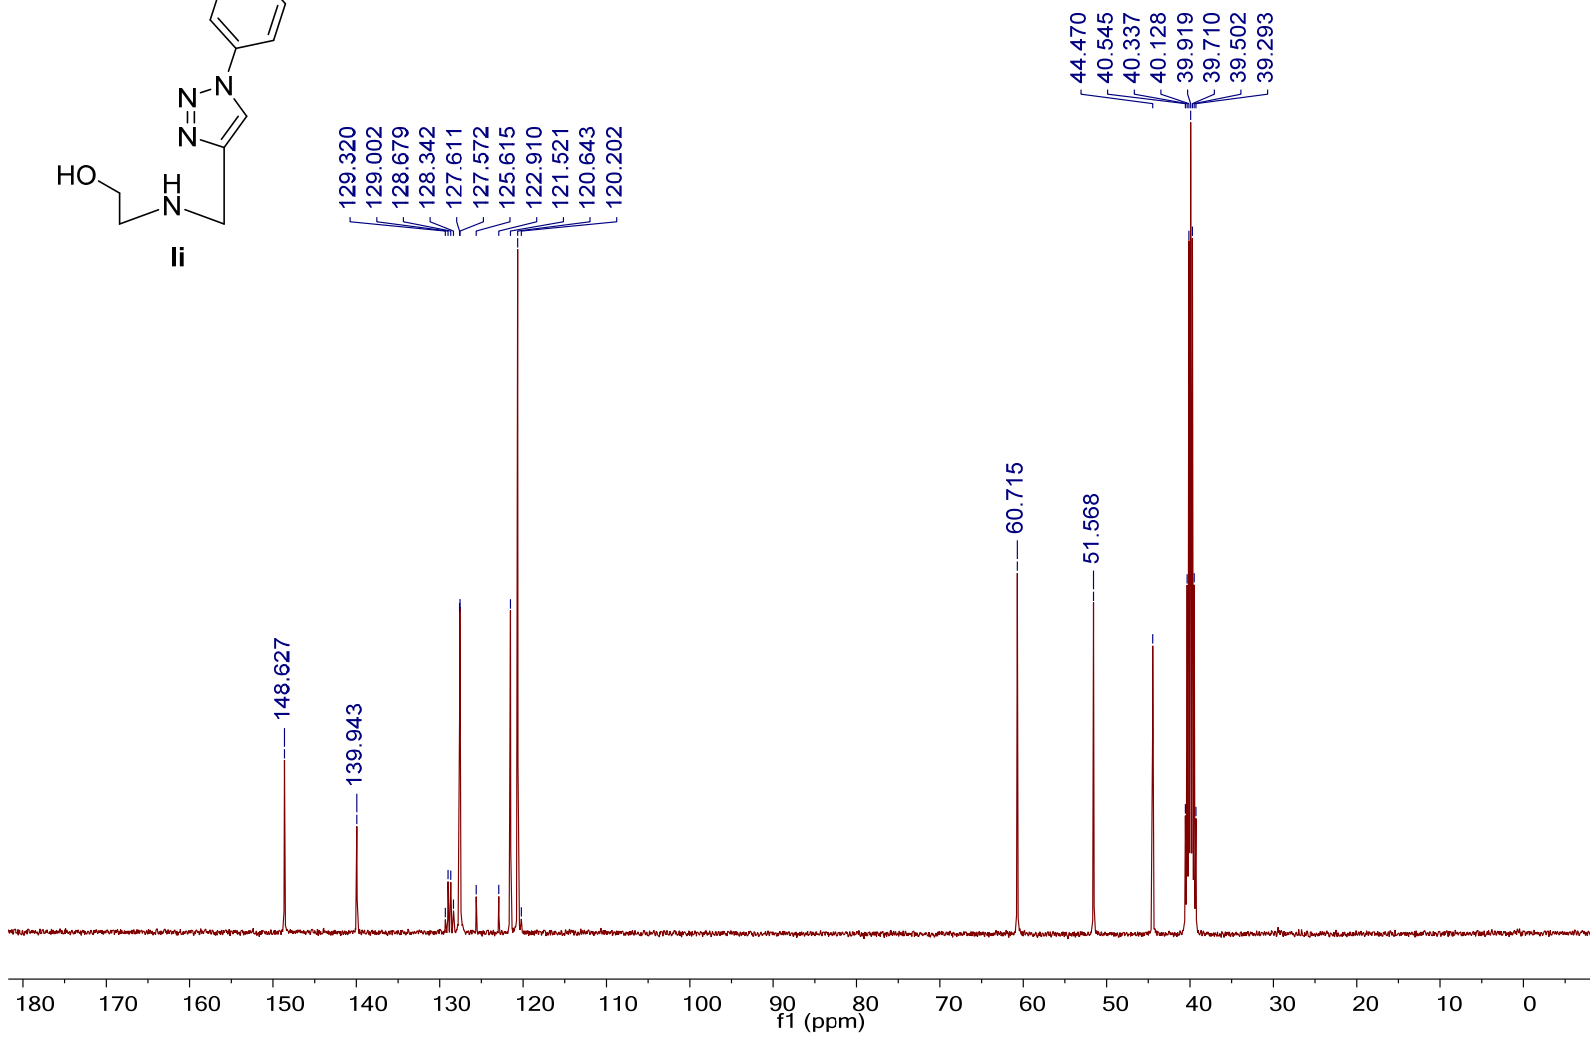



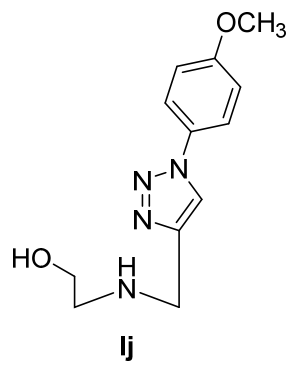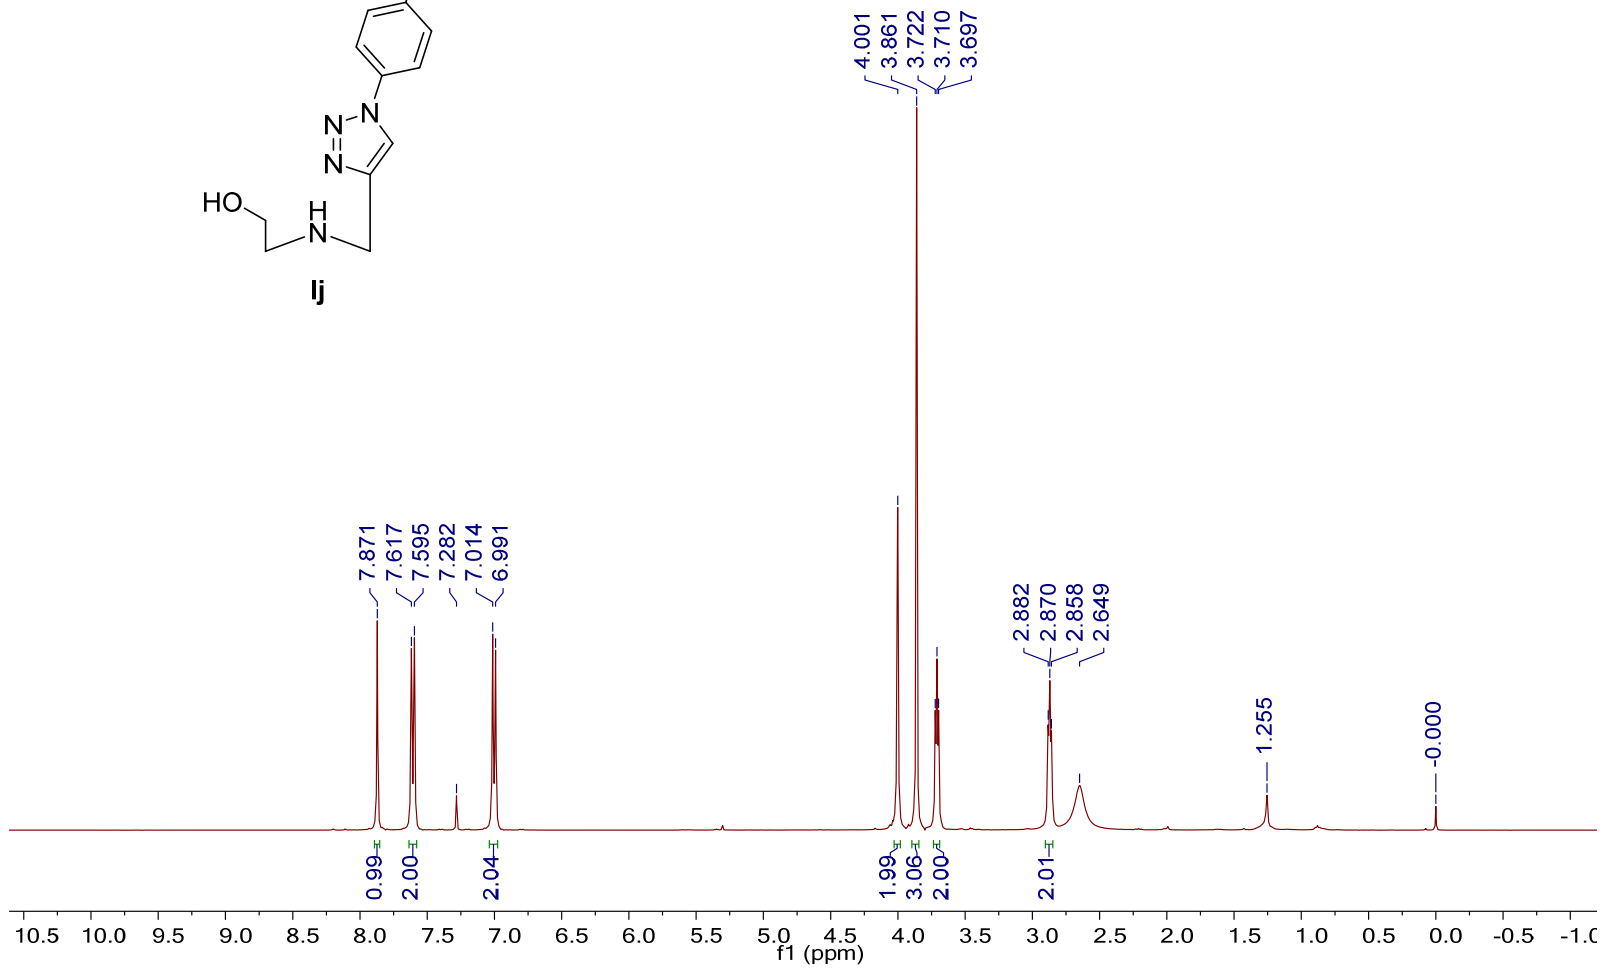

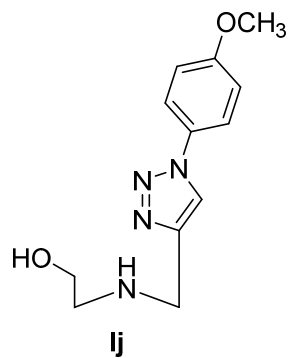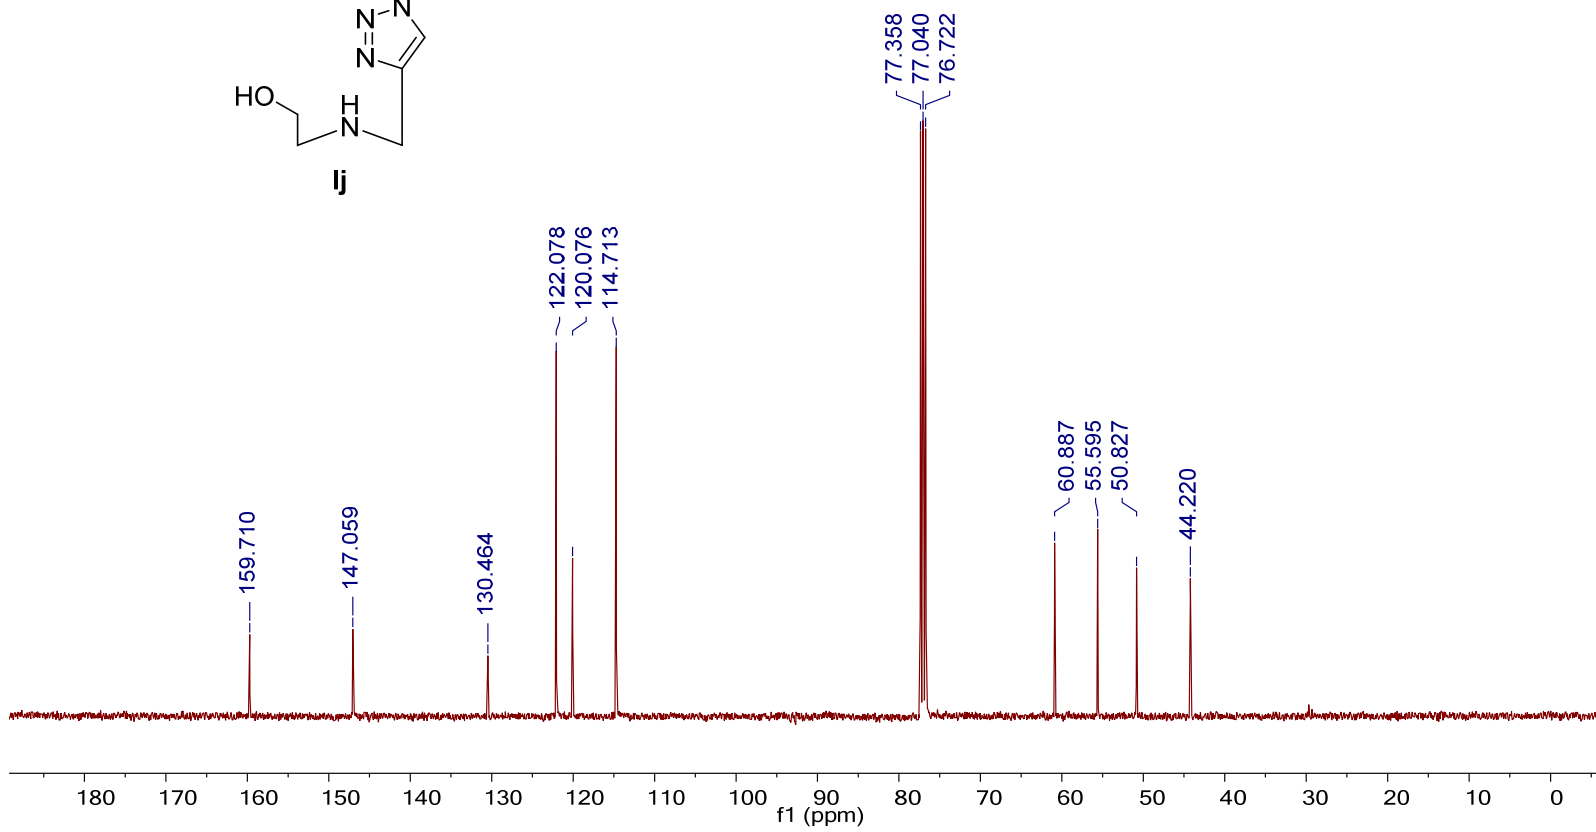

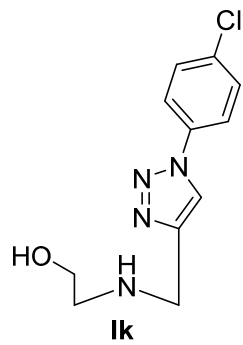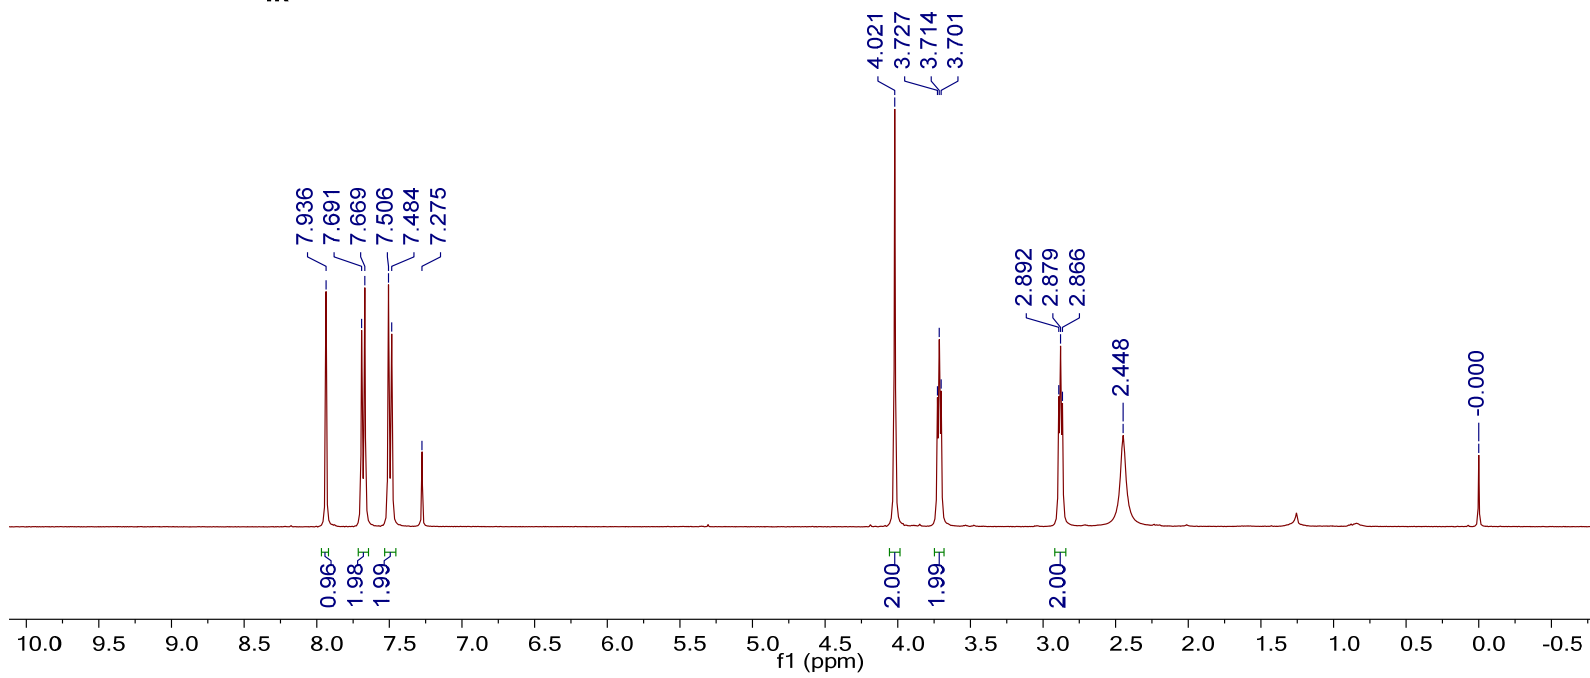

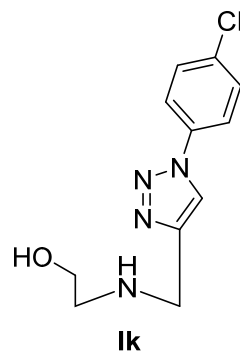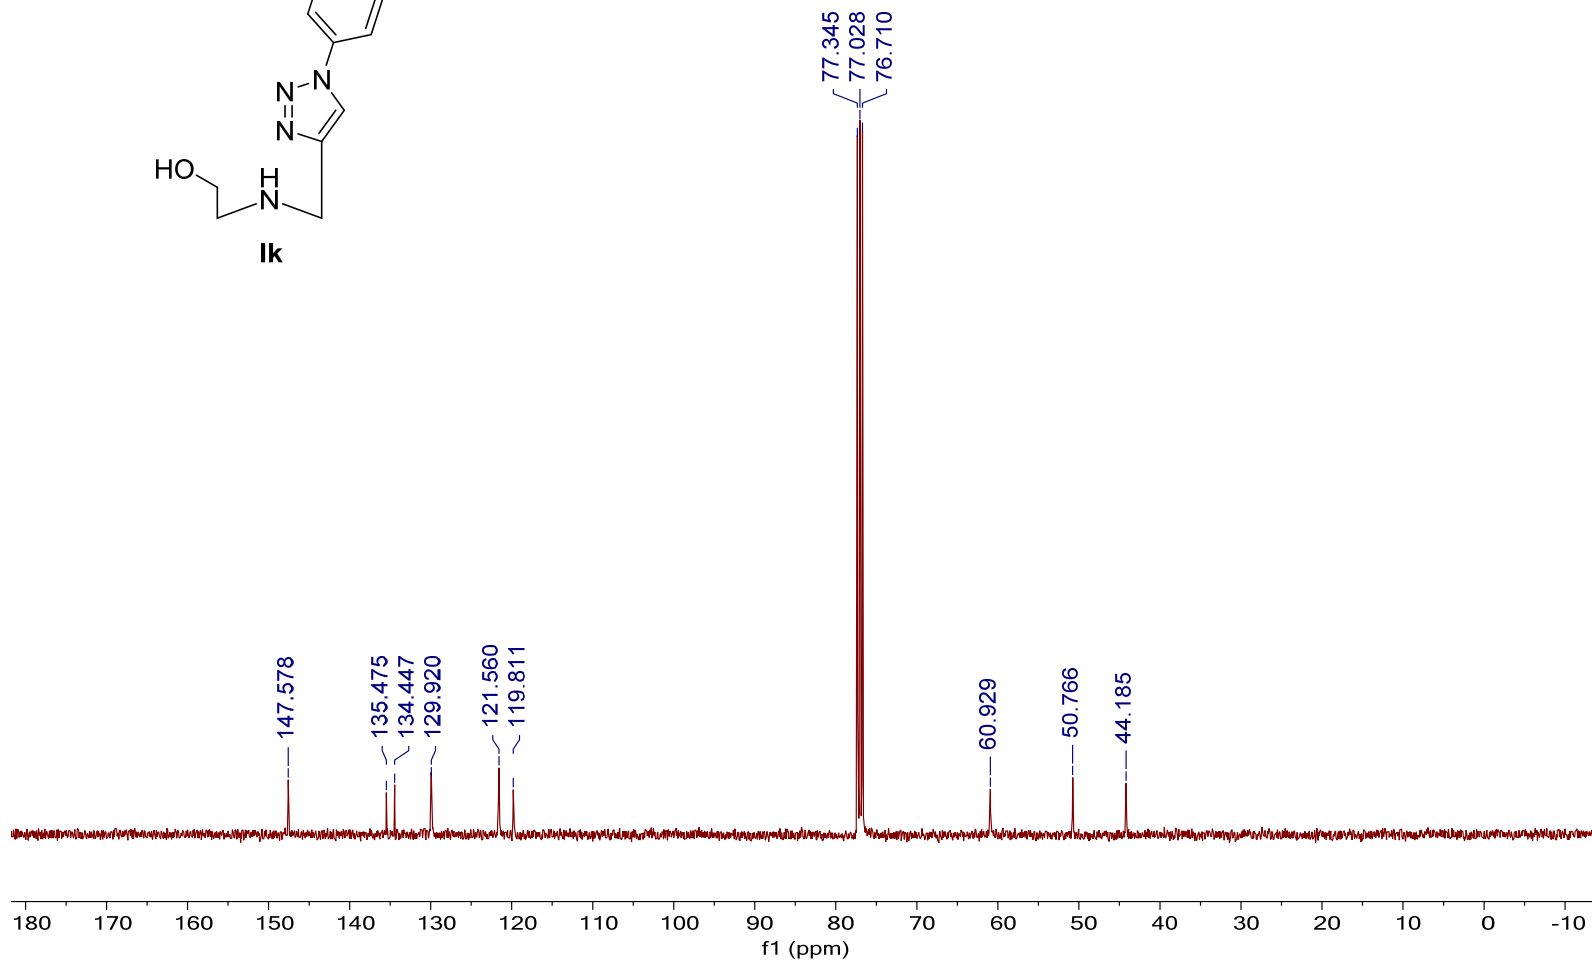

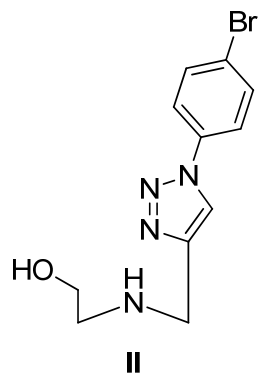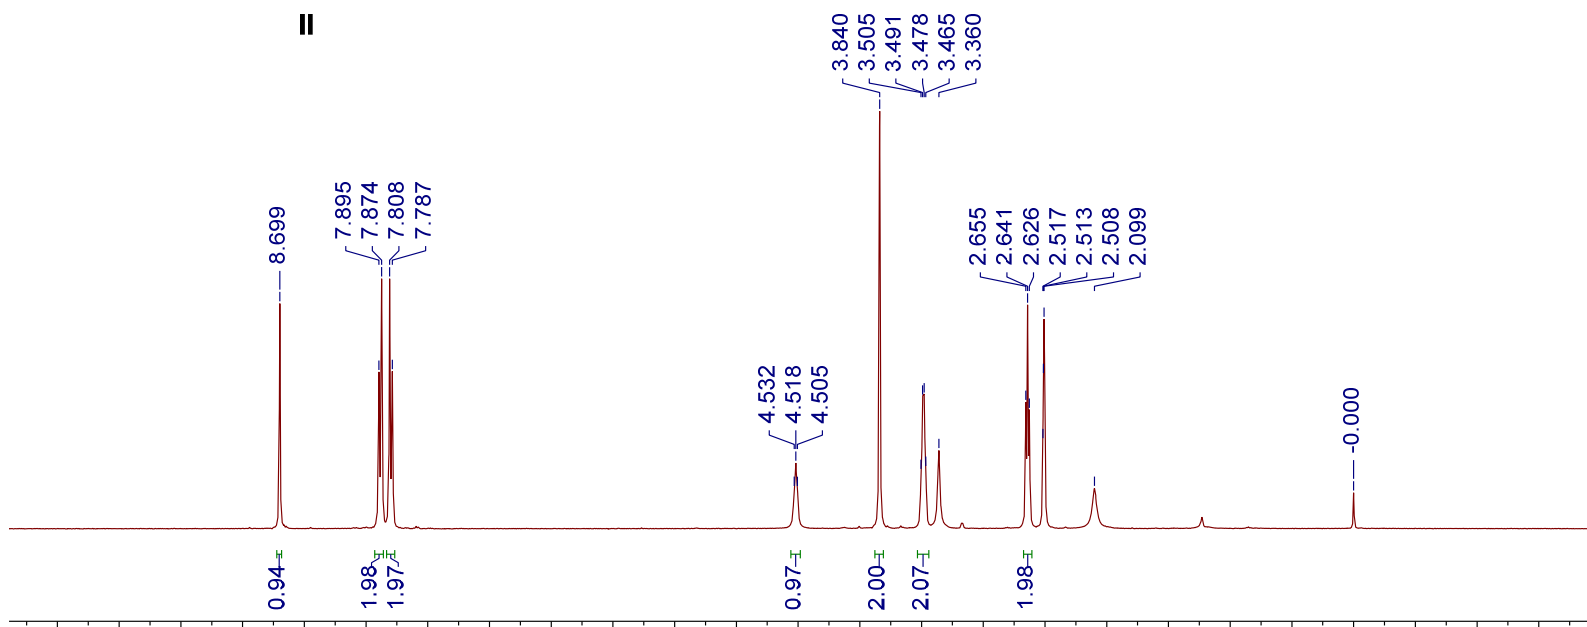

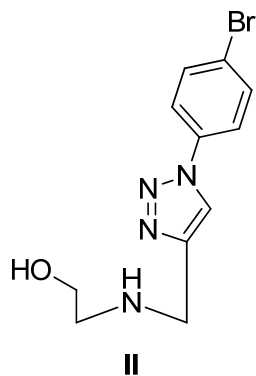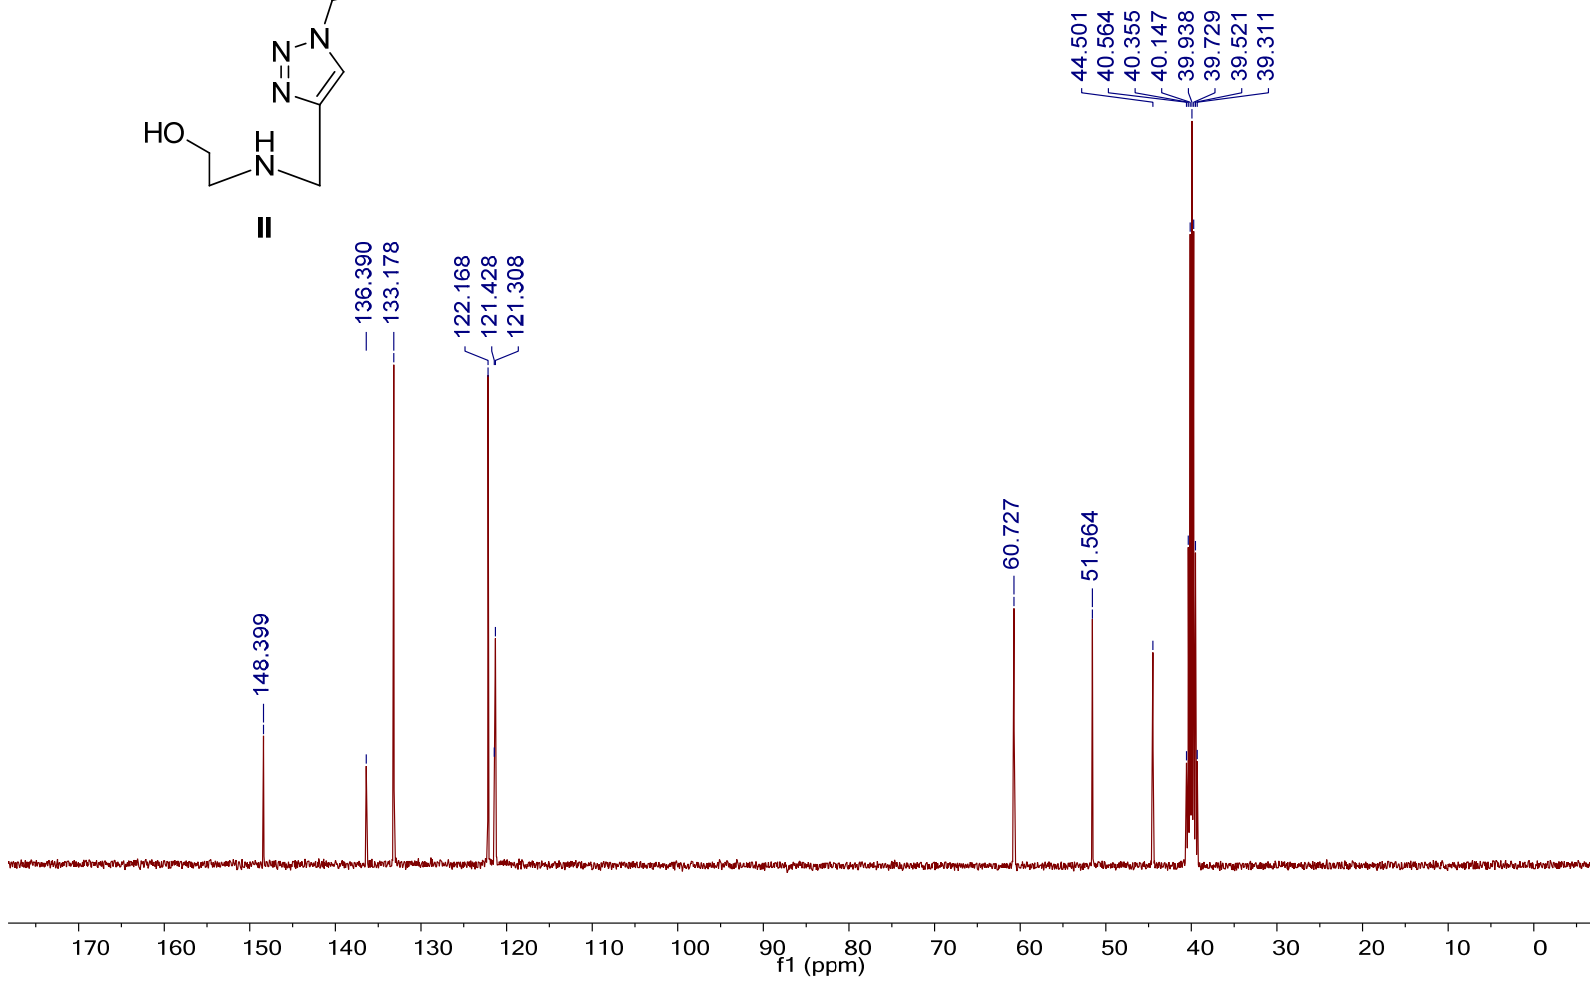

VWD1 A, Wavelength=254 nm (FY190425DEF\_LC.SFY 2019-06-03 10-50-51\036-0901.D)

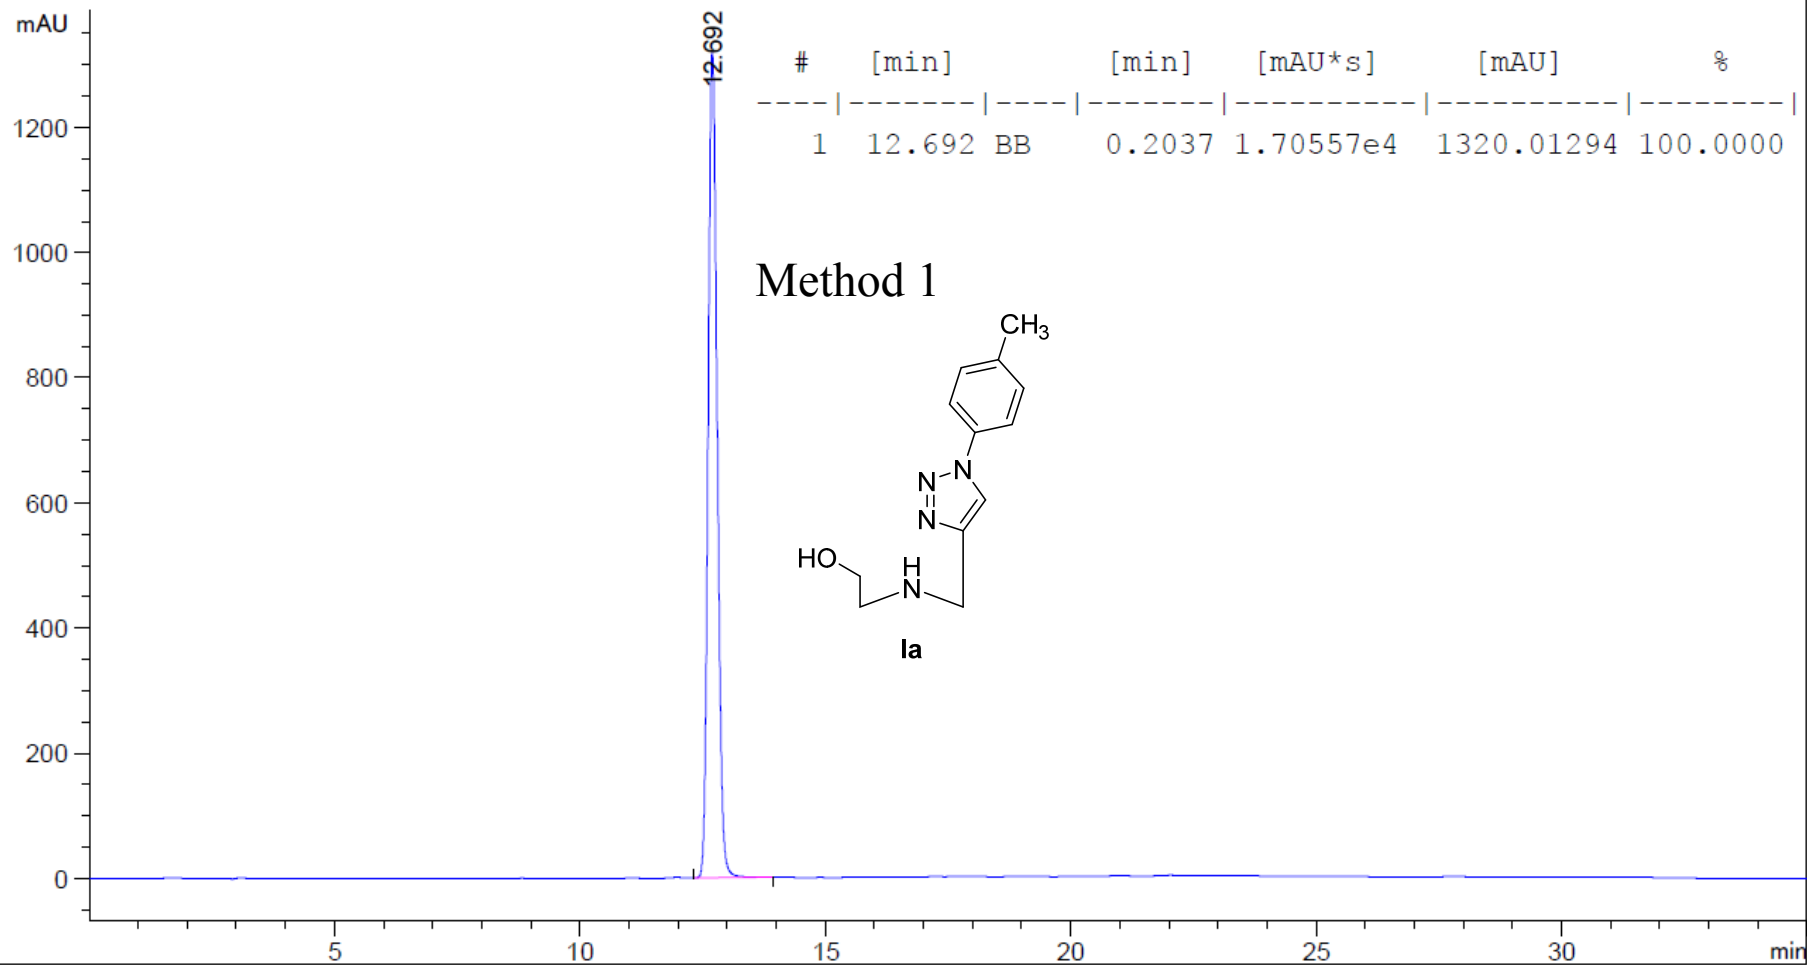

VWD1 A, Wavelength=254 nm (FY190425DEF\_LC.SFY 2019-06-04 09-49-02\036-1501.D)

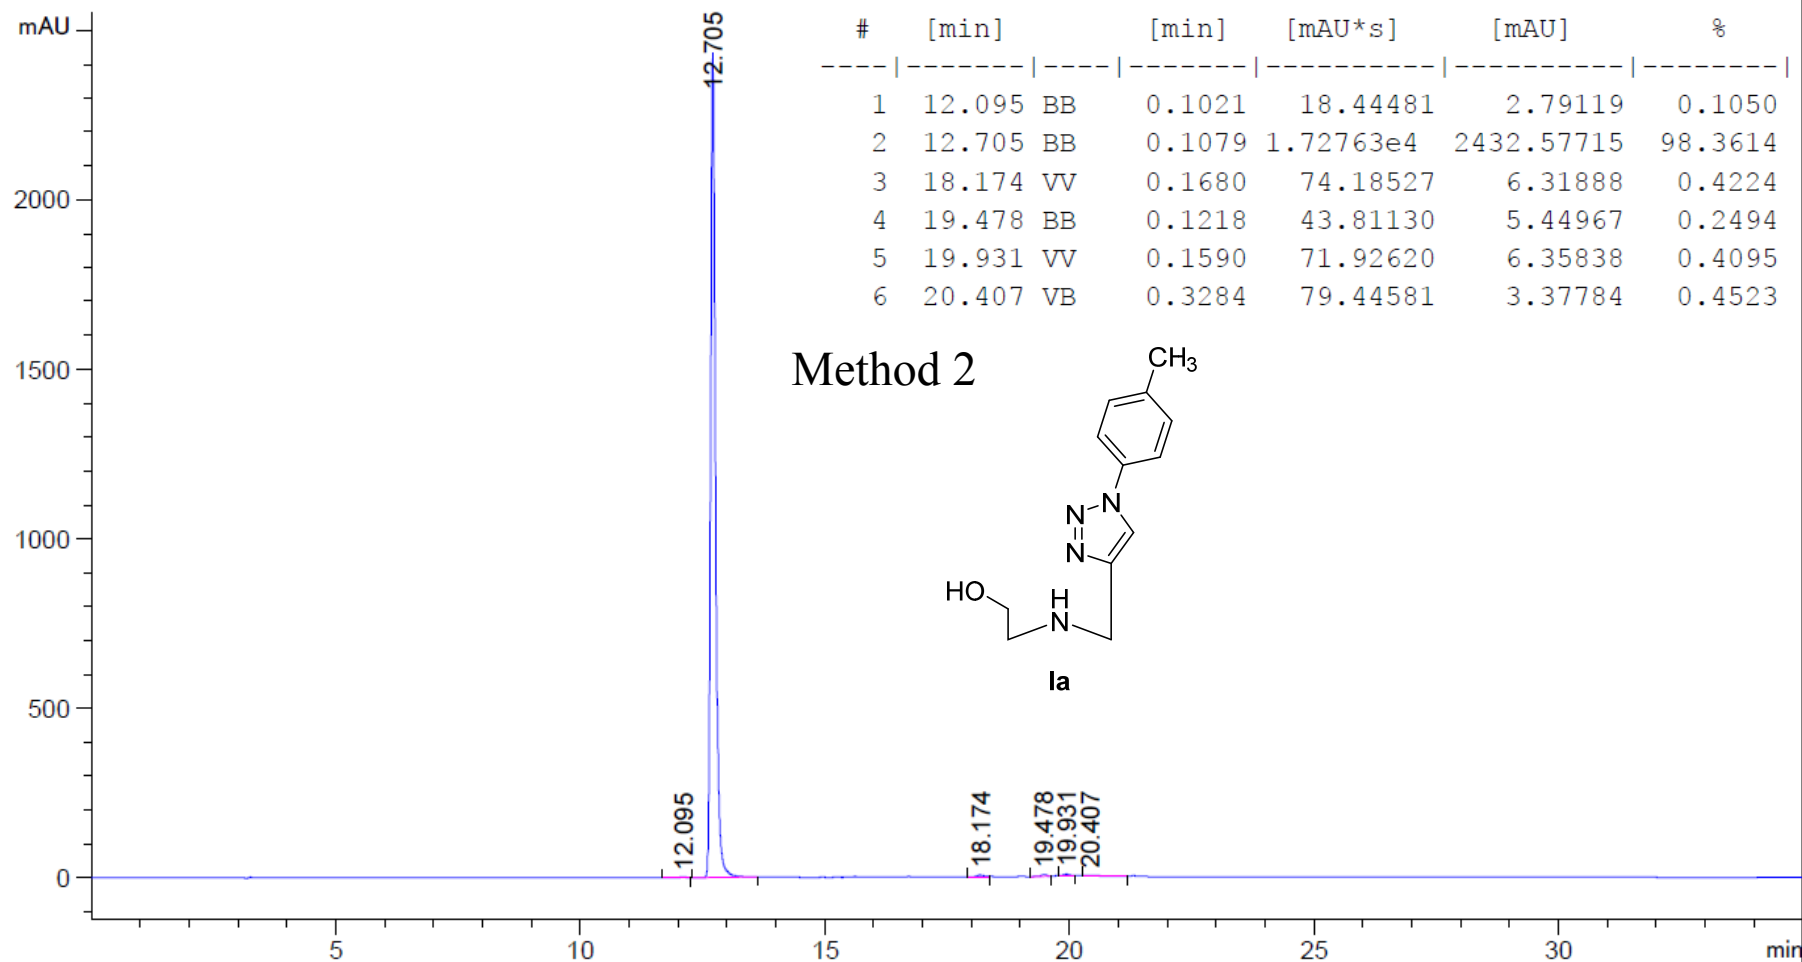

Method 2

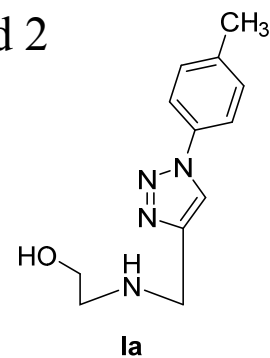



VWD1 A, Wavelength=254 nm (FY190425DEF\_LC.SFY 2019-06-01 16-03-48\021-0101.D)

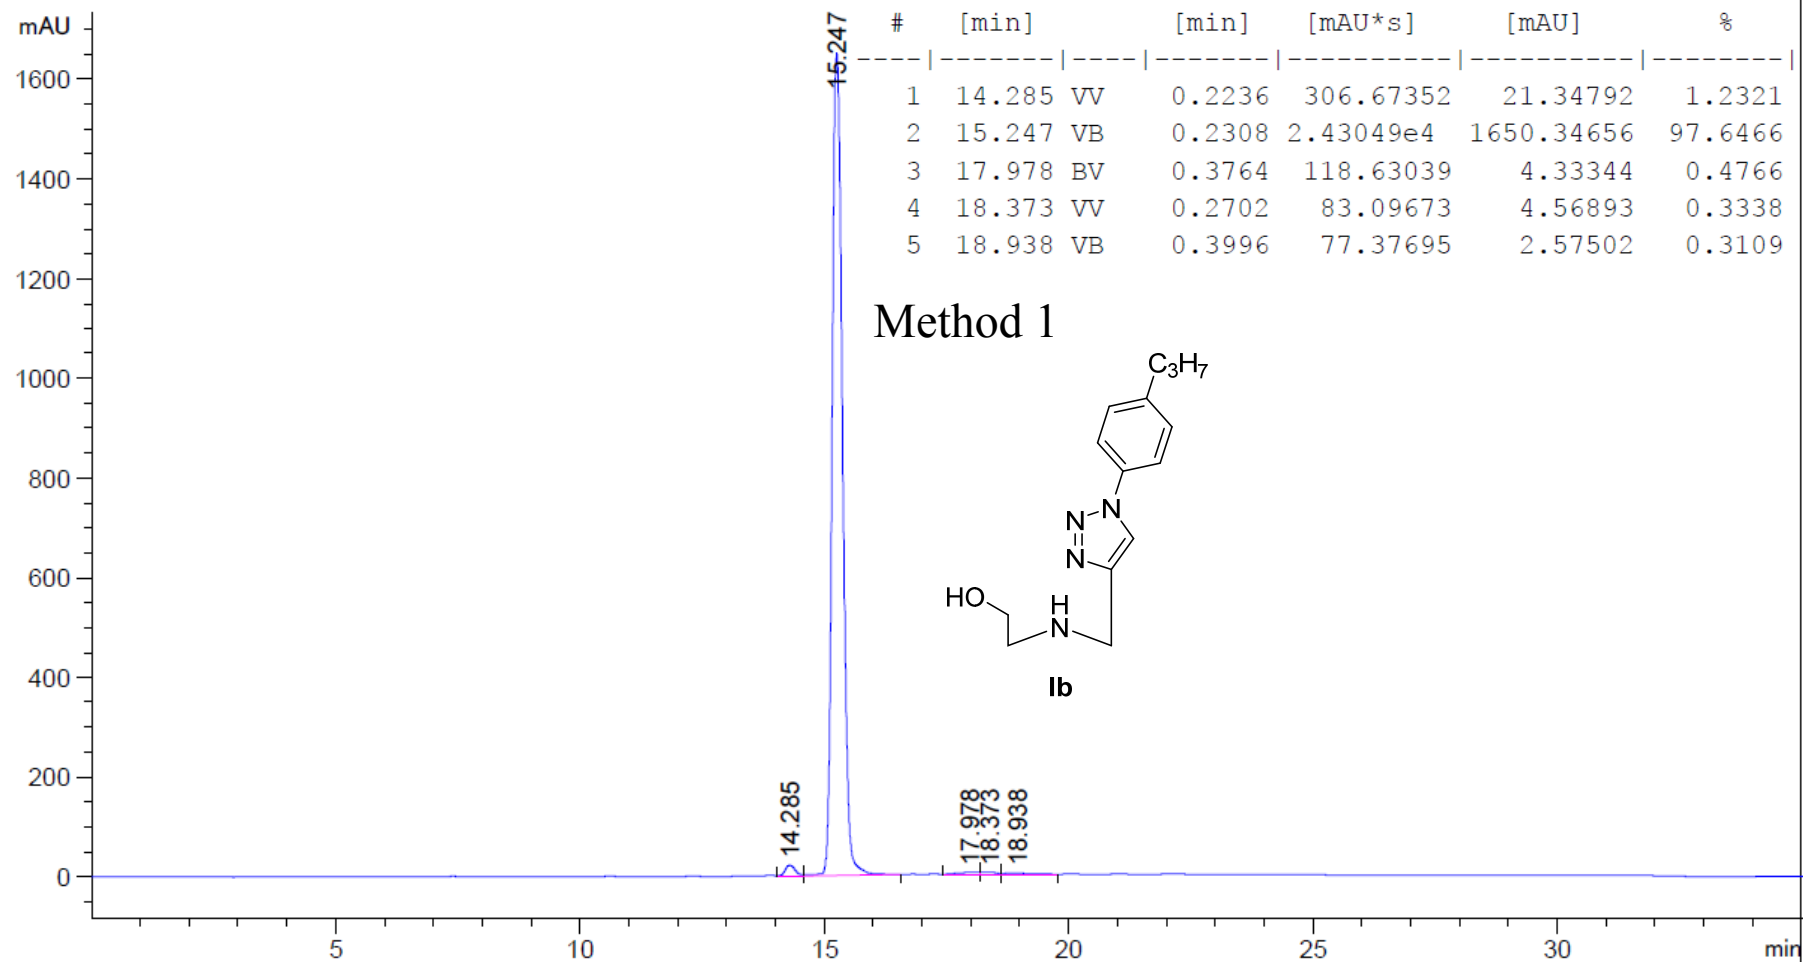

VWD1 A, Wavelength=254 nm (FY190425DEF\_LC.SFY 2019-06-04 09-49-02\021-0101.D)

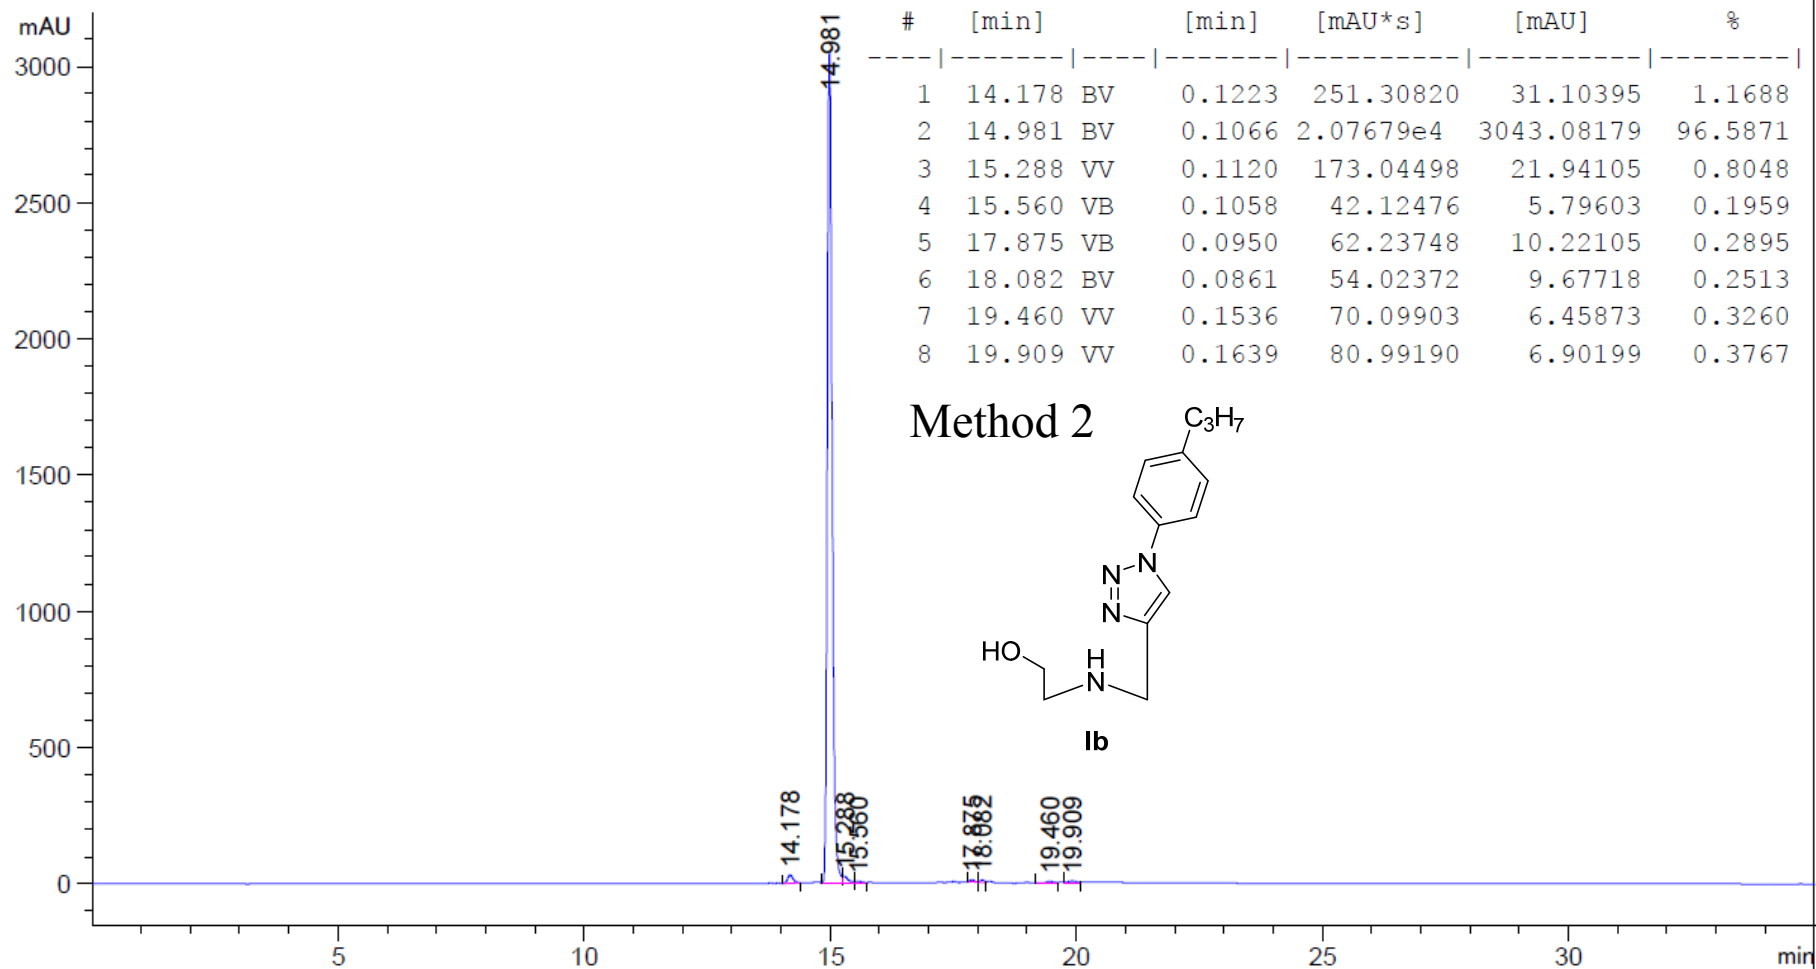

VWD1 A, Wavelength=254 nm (ZYH\2019-06-01 12-27-06.D)

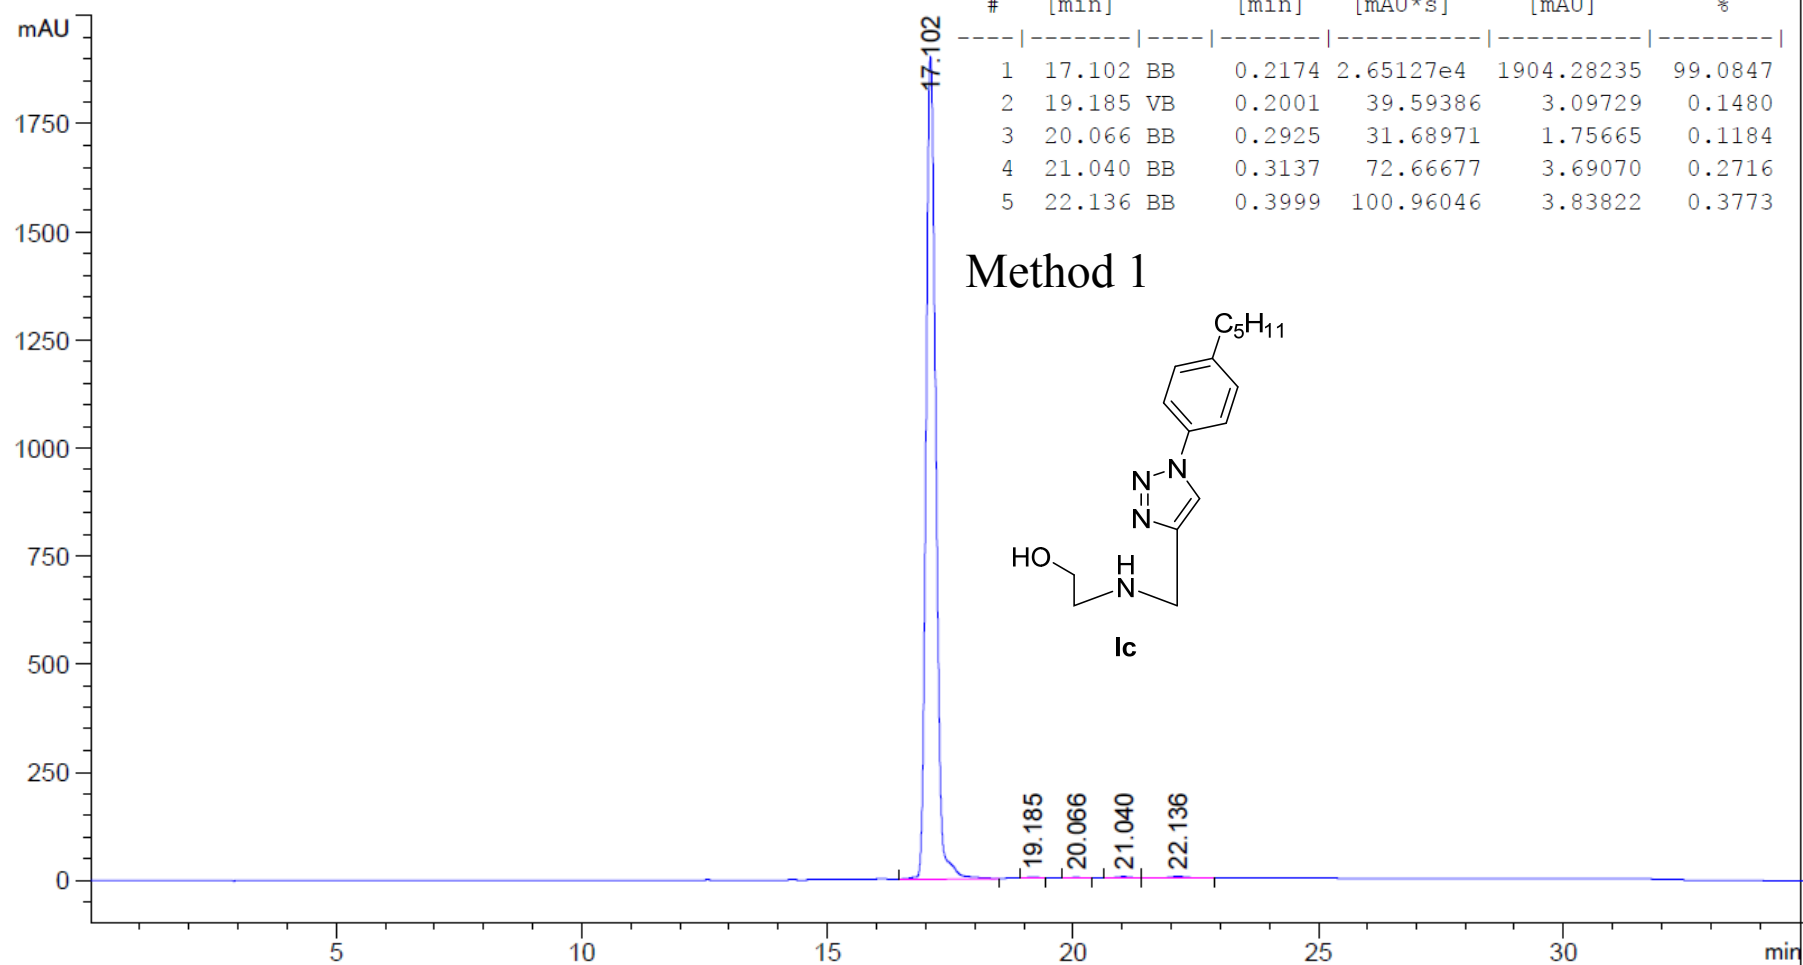

Method 1

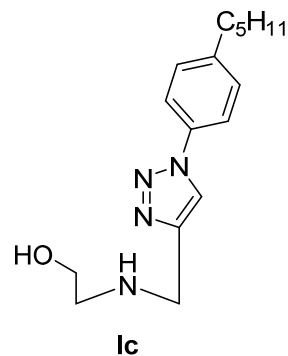

VWD1 A, Wavelength=254 nm (FY190425DEF\_LC.SFY 2019-06-03 19-02-07\016-0601.D)

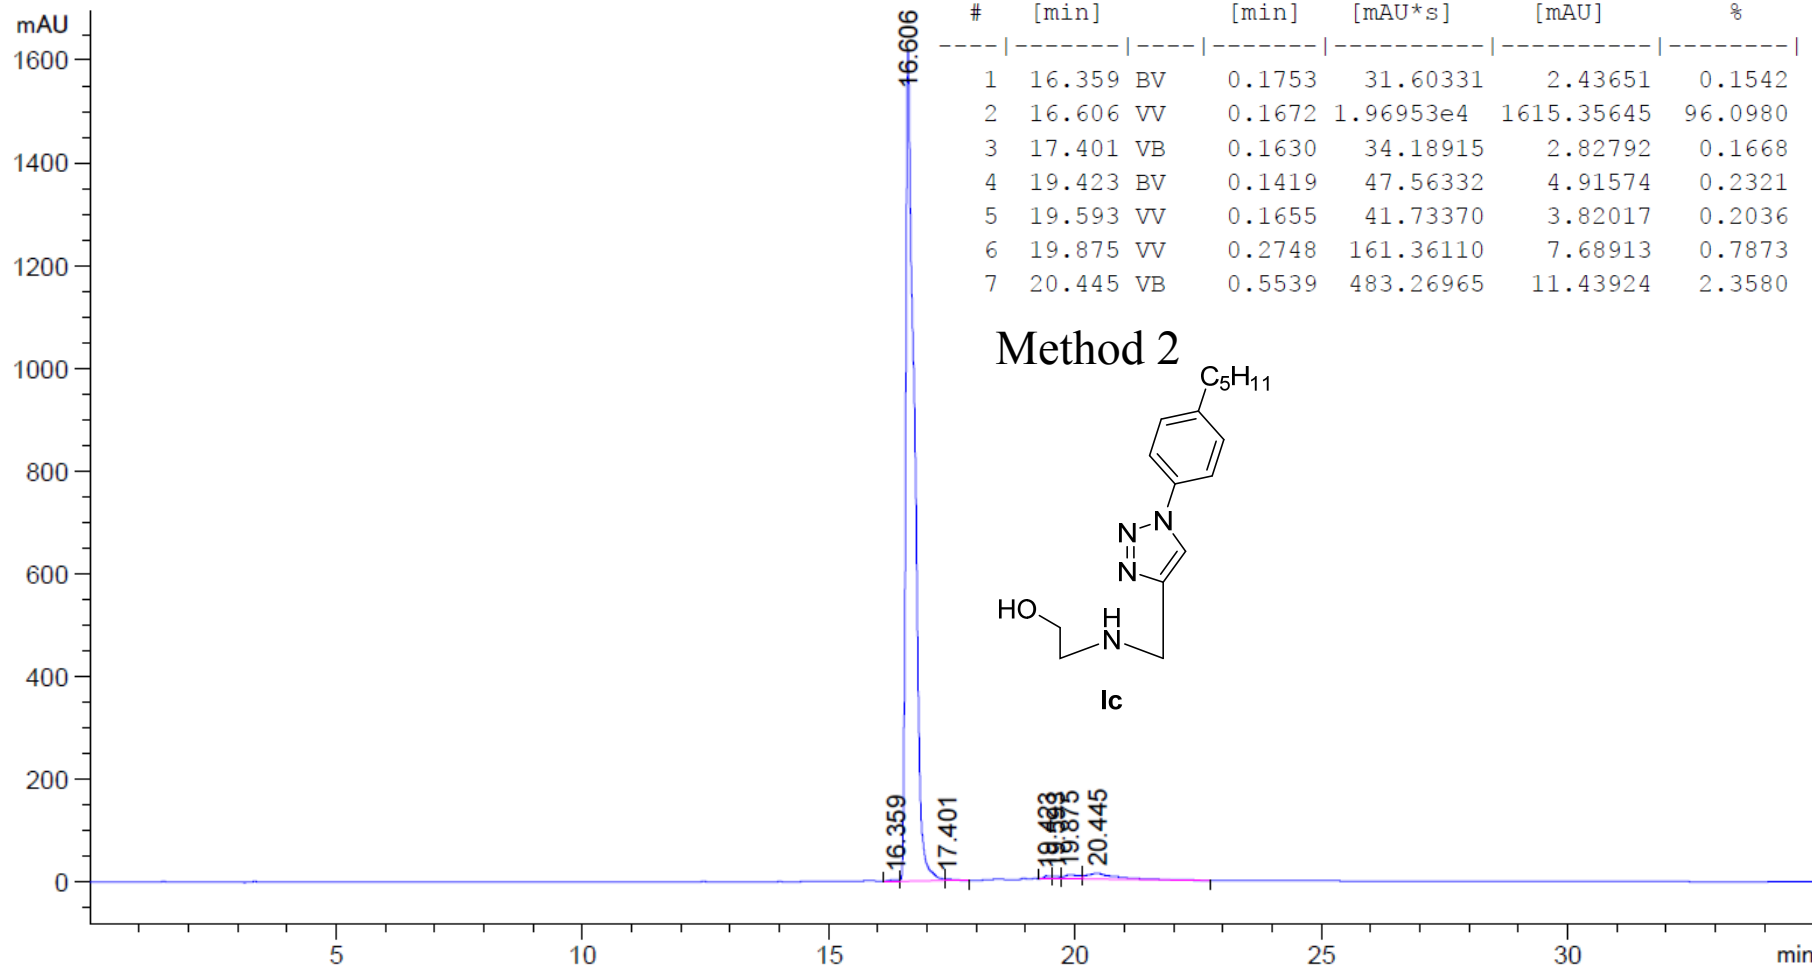

Method 2

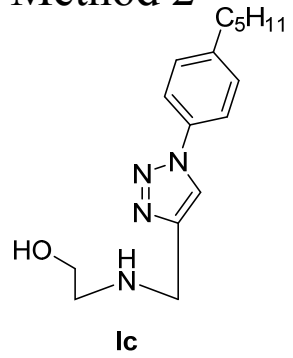

VWD1 A, Wavelength=254 nm (FY190425DEF\_LC.SFY 2019-06-01 17-27-19\022-0101.D)

| # | [min]  |    | [min]  | [mAU*s]   | [mAU]      | %       |
|---|--------|----|--------|-----------|------------|---------|
| 1 | 16.828 | BV | 0.2641 | 39.25198  | 2.37189    | 0.1448  |
| 2 | 17.195 | VV | 0.2820 | 48.90801  | 2.52504    | 0.1804  |
| 3 | 17.928 | VV | 0.3052 | 148.41342 | 6.78524    | 0.5473  |
| 4 | 18.353 | VB | 0.2538 | 2.67349e4 | 1660.88879 | 98.5964 |
| 5 | 21.045 | BB | 0.4314 | 75.24069  | 2.67293    | 0.2775  |
| 6 | 22.085 | BB | 0.4422 | 68.77412  | 2.32432    | 0.2536  |

Method 1

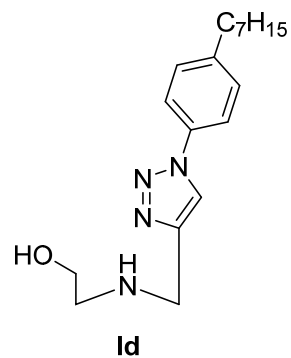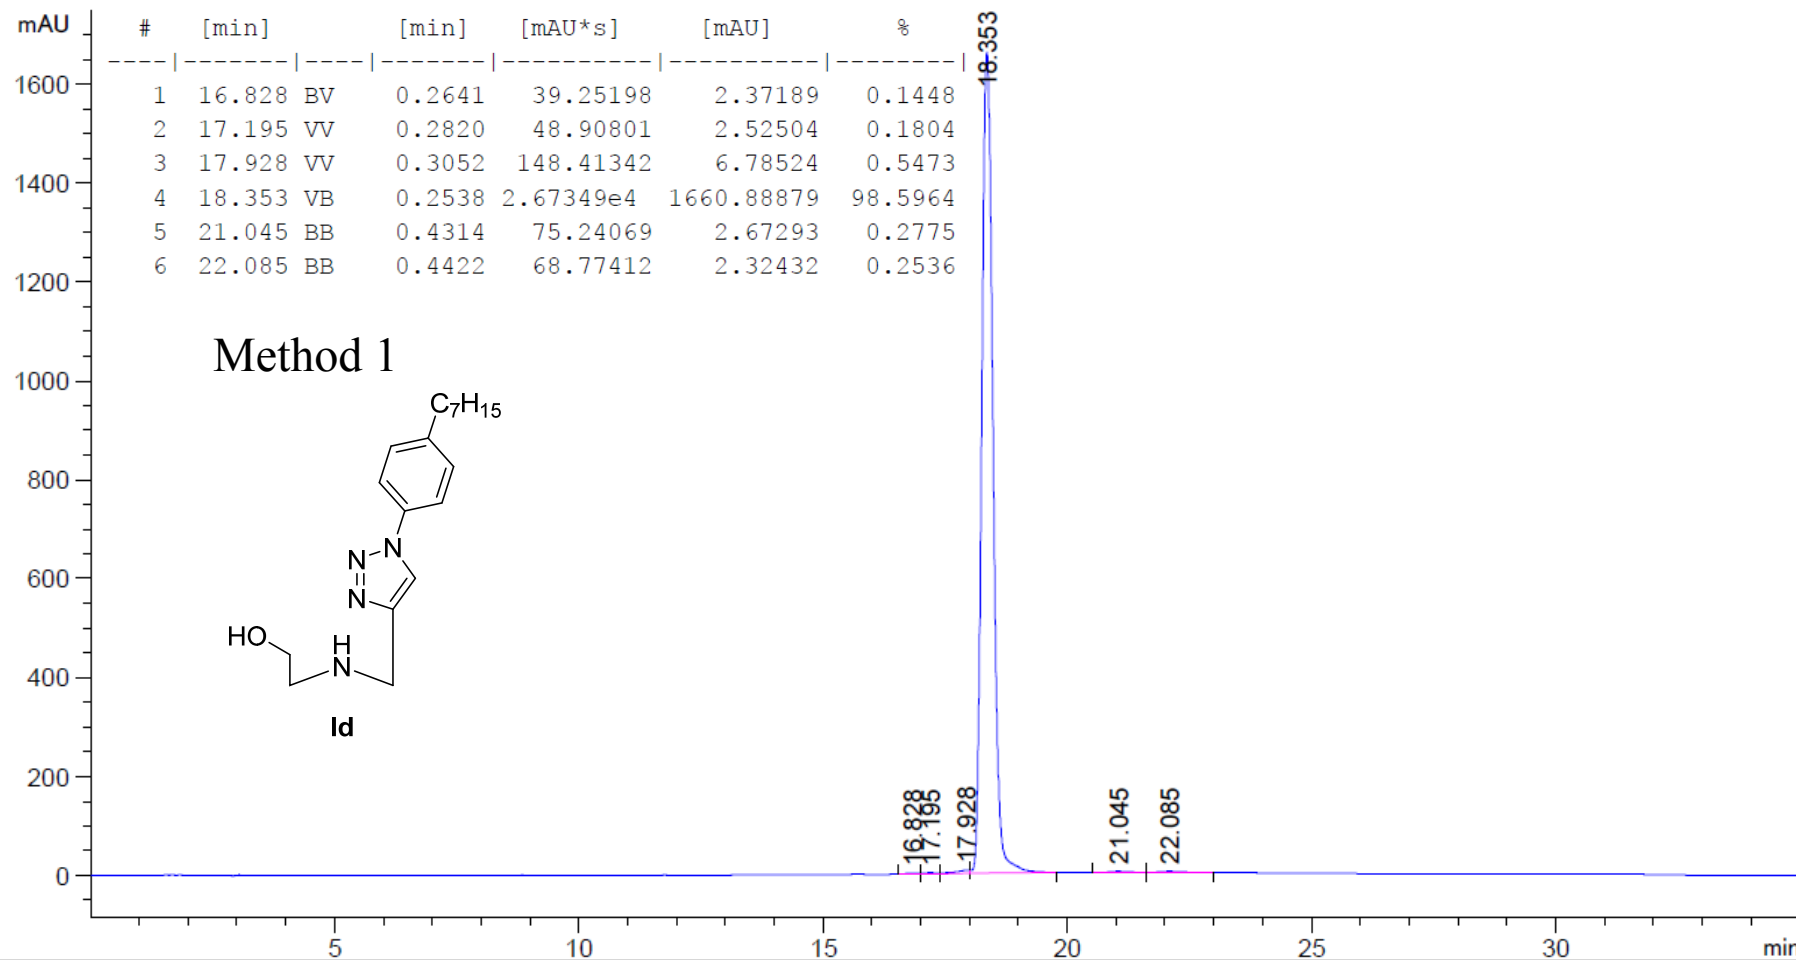

VWD1 A, Wavelength=254 nm (FY190425DEF\_LC.SFY 2019-06-04 09-49-02\022-0201.D)

| # | [min]  |    | [min]  | [mAU*s]   | [mAU]      | %       |
|---|--------|----|--------|-----------|------------|---------|
| 1 | 17.407 | BB | 0.0959 | 42.17682  | 6.56727    | 0.2339  |
| 2 | 17.749 | BV | 0.0949 | 1.74643e4 | 2833.02490 | 96.8701 |
| 3 | 18.069 | VV | 0.1323 | 234.51511 | 24.35652   | 1.3008  |
| 4 | 18.991 | BB | 0.1315 | 41.86037  | 5.05896    | 0.2322  |
| 5 | 19.464 | BB | 0.1198 | 98.82977  | 12.42097   | 0.5482  |
| 6 | 19.912 | VV | 0.1522 | 146.89954 | 13.57878   | 0.8148  |

Method 2

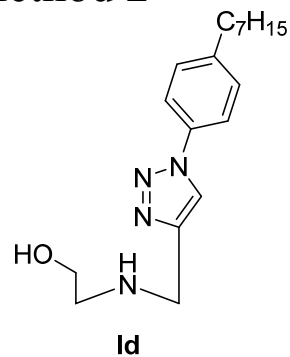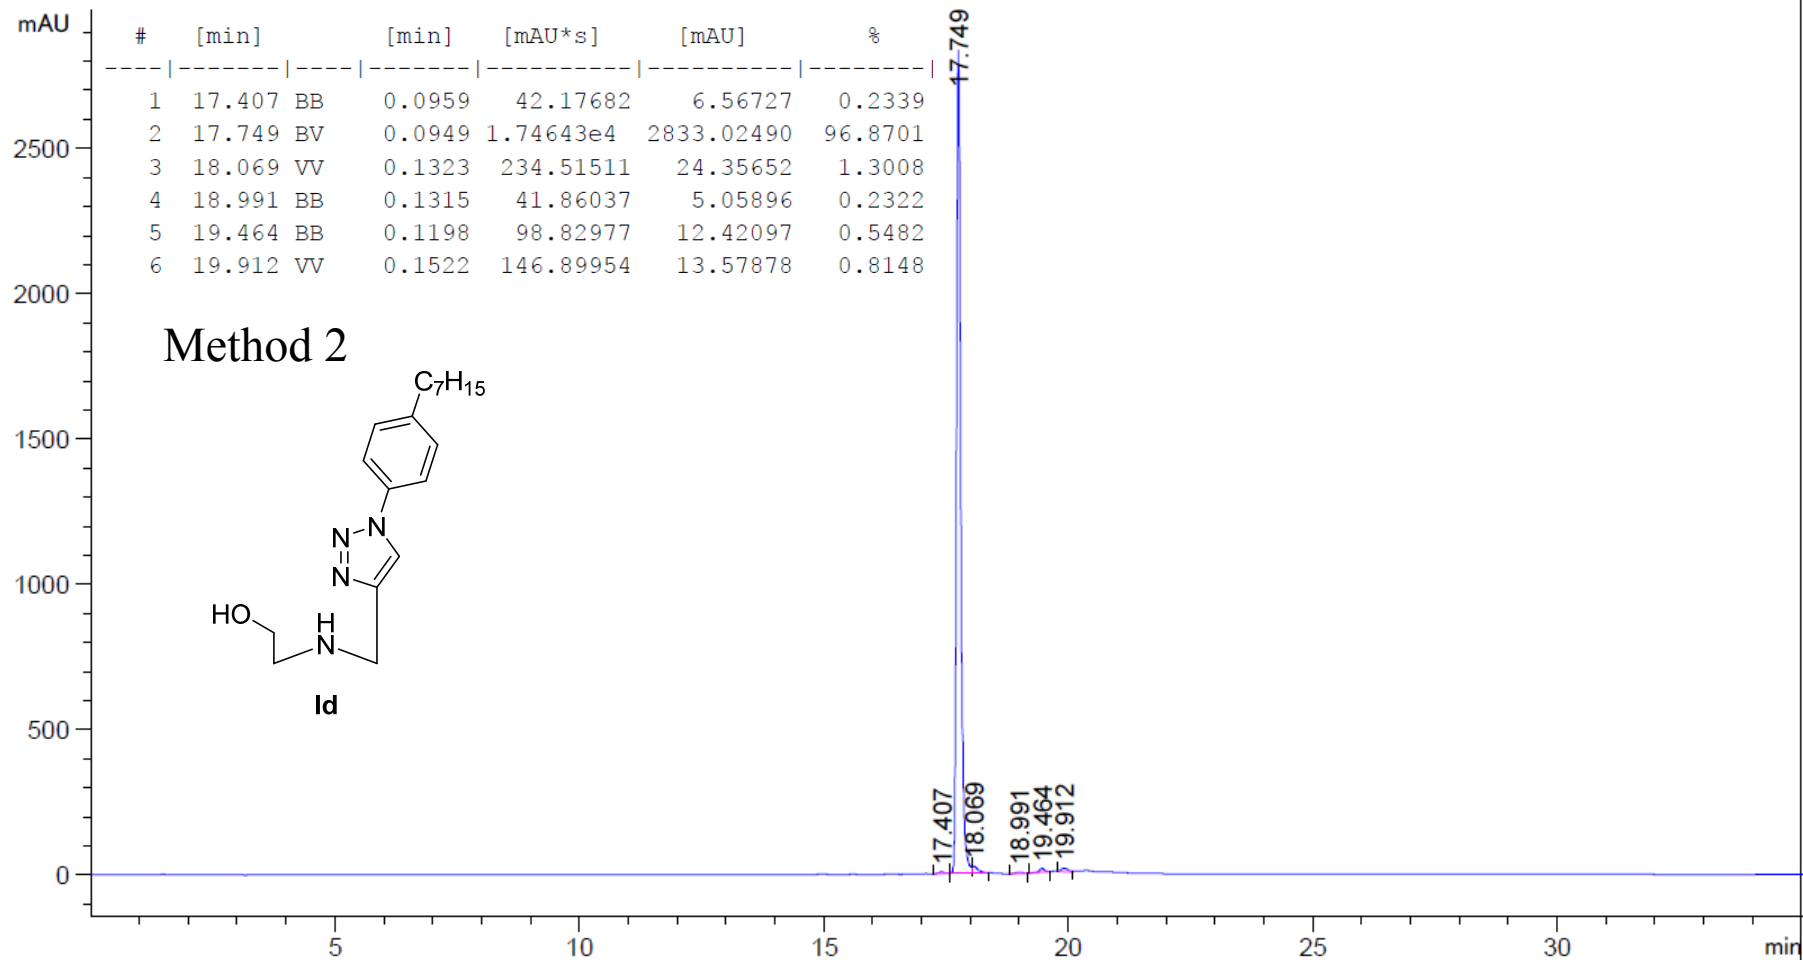

VWD1 A, Wavelength=254 nm (ZWZ2019-06-01 10-58-25.D)

| # | [min]  |    | [min]  | [mAU*s]   | [mAU]      | %       |
|---|--------|----|--------|-----------|------------|---------|
| 1 | 16.822 | BV | 0.2380 | 57.32187  | 3.73528    | 0.2923  |
| 2 | 17.192 | VV | 0.3732 | 128.24361 | 4.87066    | 0.6540  |
| 3 | 19.387 | BV | 0.2000 | 112.68510 | 8.48284    | 0.5747  |
| 4 | 19.854 | VB | 0.2341 | 1.91751e4 | 1270.57324 | 97.7873 |

### Method 1

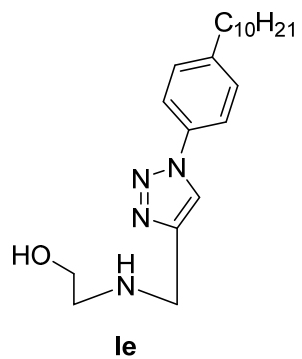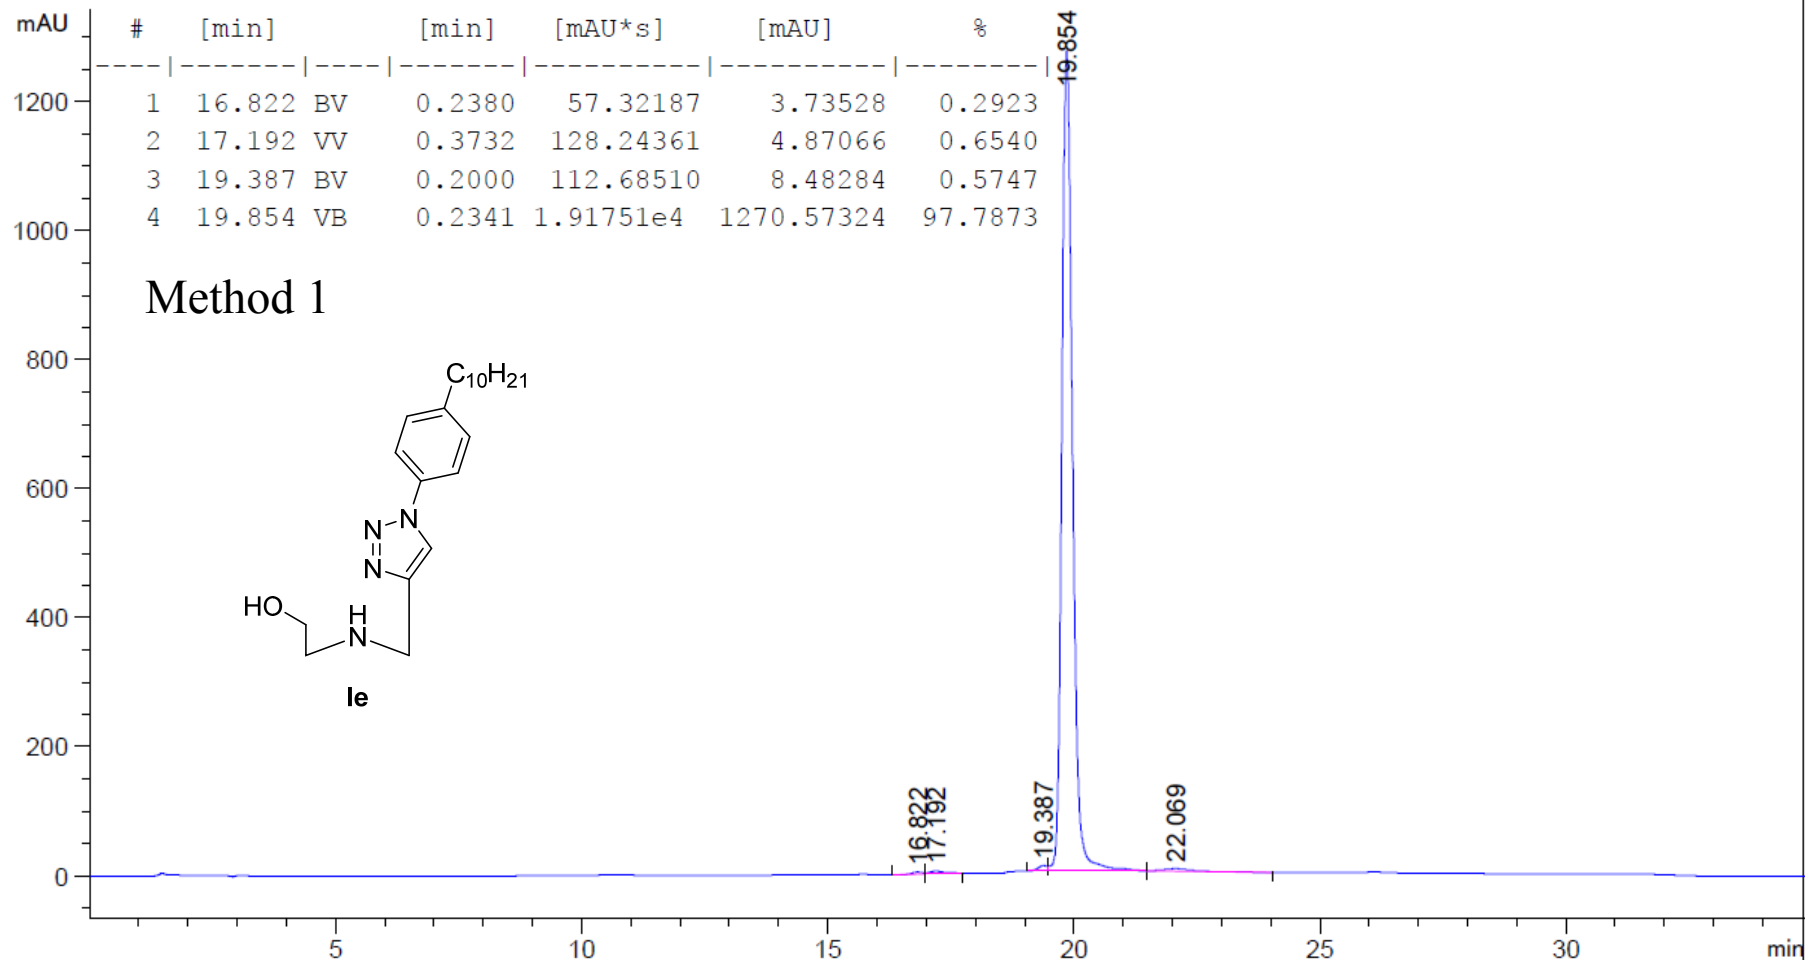

VWD1 A, Wavelength=254 nm (FY190425DEF\_LC.SFY 2019-06-03 19-02-07\014-0401.D)

| # | [min]  |    | [min]  | [mAU*s]   | [mAU]      | %       |
|---|--------|----|--------|-----------|------------|---------|
| 1 | 1.492  | BV | 0.1060 | 172.78169 | 23.70901   | 0.8194  |
| 2 | 17.398 | BV | 0.2936 | 103.46705 | 5.21143    | 0.4907  |
| 3 | 18.456 | BV | 0.1149 | 54.85160  | 6.96024    | 0.2601  |
| 4 | 18.776 | VV | 0.2318 | 2.06827e4 | 1183.79102 | 98.0815 |
| 5 | 19.867 | VB | 0.2065 | 40.84987  | 2.70069    | 0.1937  |
| 6 | 20.981 | VV | 0.2935 | 32.60613  | 1.74086    | 0.1546  |

Method 2

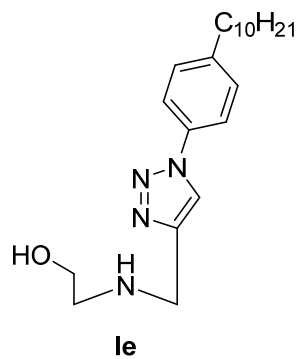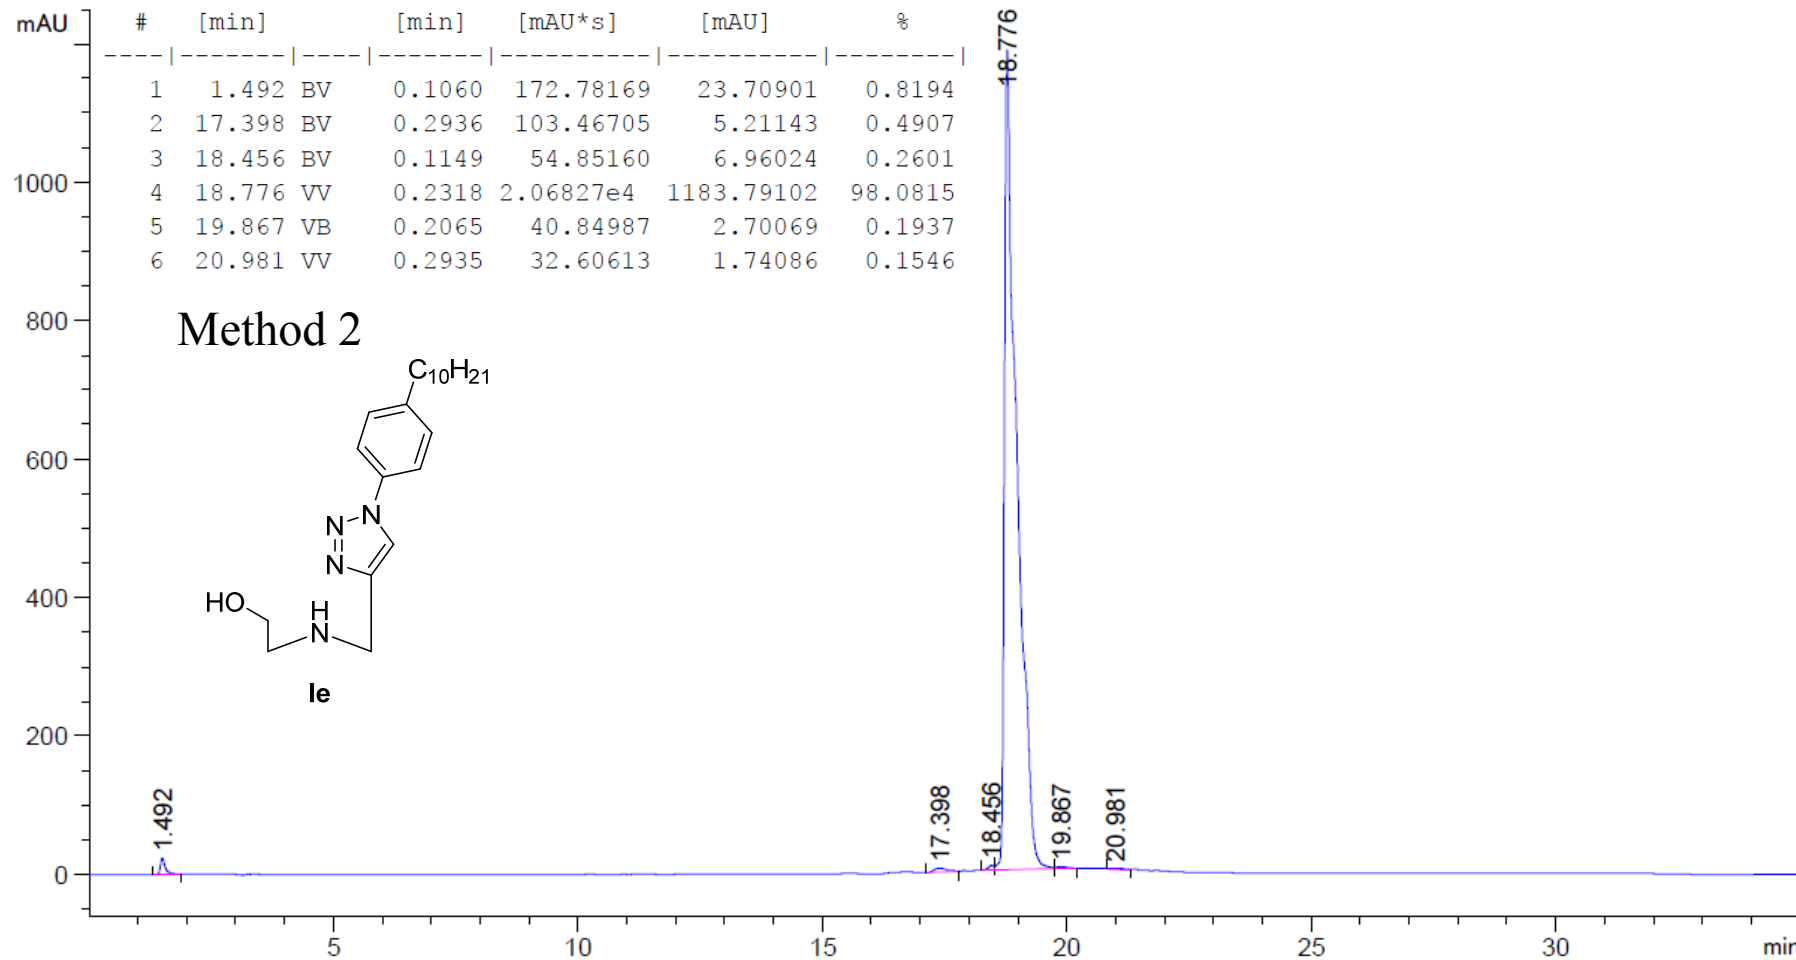



VWD1 A, Wavelength=254 nm (FY190425DEF\_LC.SFY 2019-06-01 17-27-19\023-0201.D)

| # | [min]  |    | [min]  | [mAU*s]   | [mAU]     | %       |
|---|--------|----|--------|-----------|-----------|---------|
| 1 | 13.730 | BB | 0.2133 | 59.29742  | 4.34393   | 0.2752  |
| 2 | 17.252 | BV | 0.2697 | 31.93840  | 1.86542   | 0.1482  |
| 3 | 17.949 | VV | 0.3060 | 36.50195  | 1.71702   | 0.1694  |
| 4 | 19.959 | BV | 0.3337 | 148.16371 | 6.83958   | 0.6876  |
| 5 | 20.991 | VV | 0.3150 | 2.12711e4 | 996.72205 | 98.7195 |

### Method 1

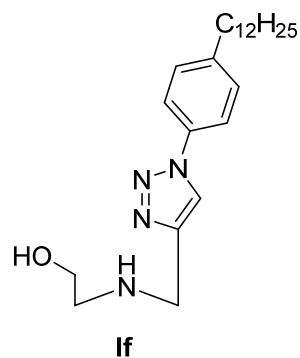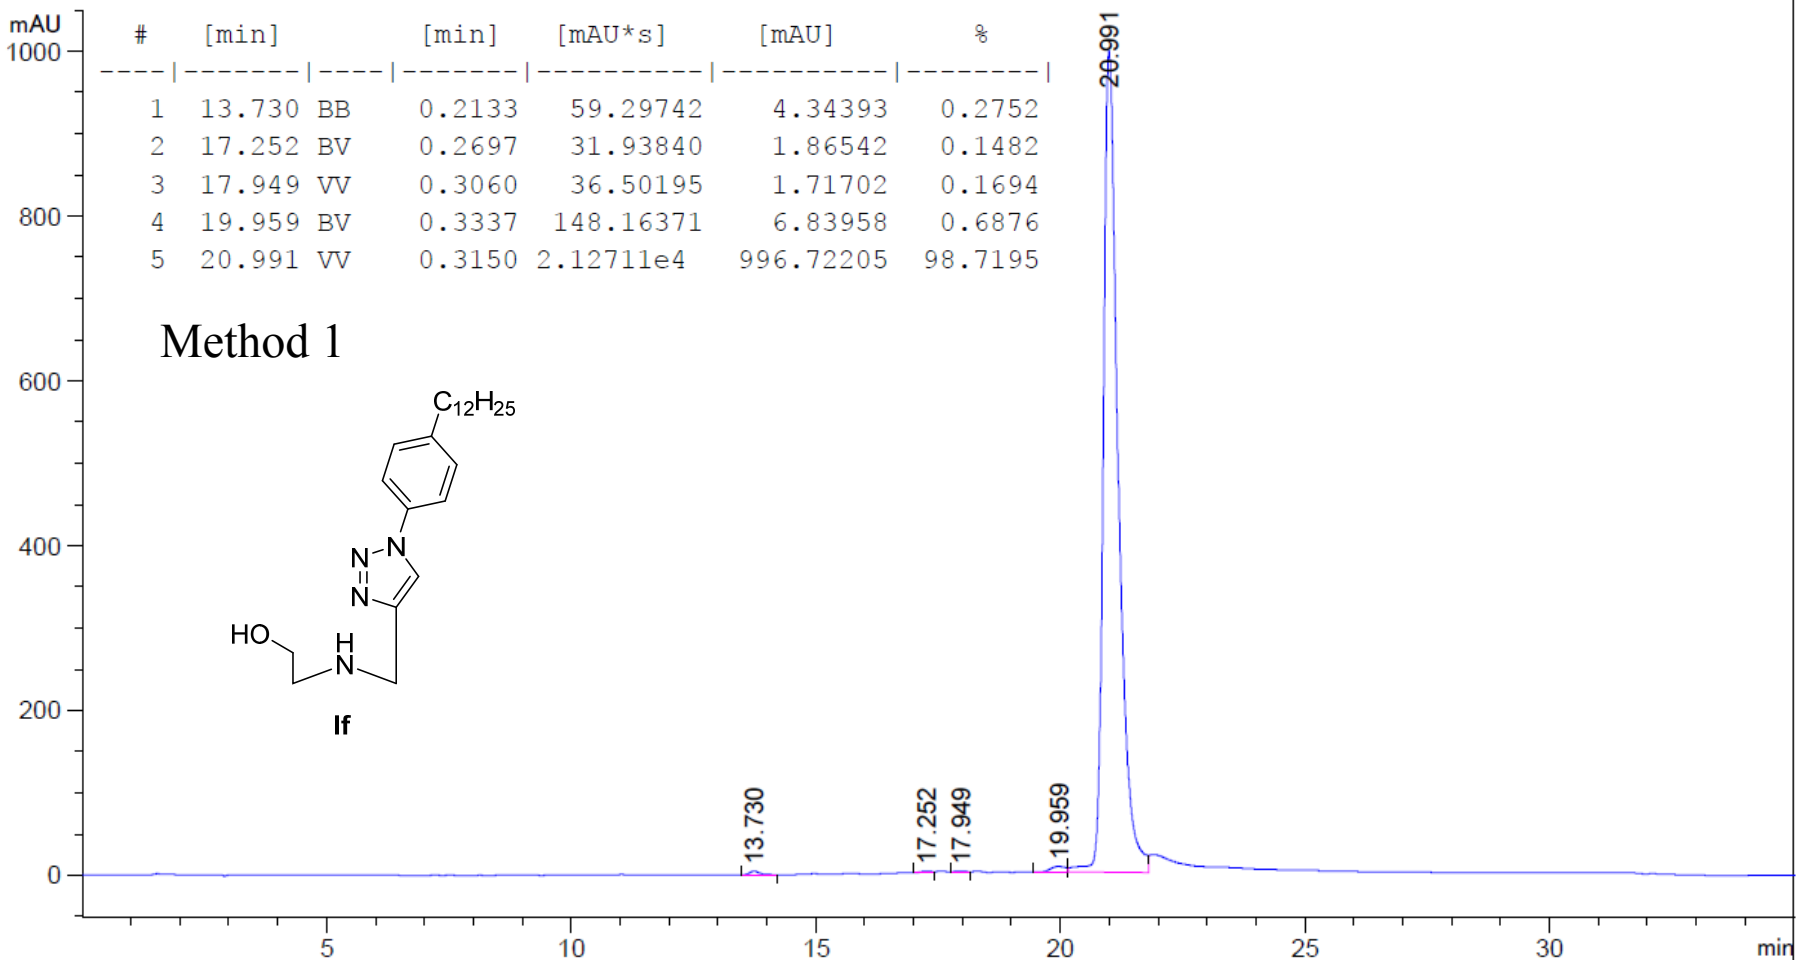

VWD1 A, Wavelength=254 nm (FY190425DEF\_LC.SFY 2019-06-04 09-49-02\023-0301.D)

| # | [min]  |    | [min]  | [mAU*s]   | [mAU]      | %       |
|---|--------|----|--------|-----------|------------|---------|
| 1 | 9.550  | BV | 0.1179 | 157.90239 | 20.71993   | 1.0482  |
| 2 | 17.440 | VV | 0.1468 | 24.00167  | 2.41732    | 0.1593  |
| 3 | 18.989 | BV | 0.1394 | 89.70851  | 9.56607    | 0.5955  |
| 4 | 19.448 | BV | 0.1004 | 1.44378e4 | 2203.34155 | 95.8453 |
| 5 | 19.898 | VV | 0.1960 | 319.25705 | 24.49640   | 2.1194  |
| 6 | 20.368 | BB | 0.1874 | 34.98446  | 3.05905    | 0.2322  |

### Method 2

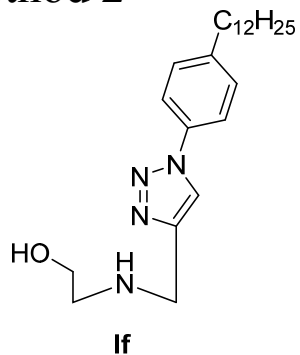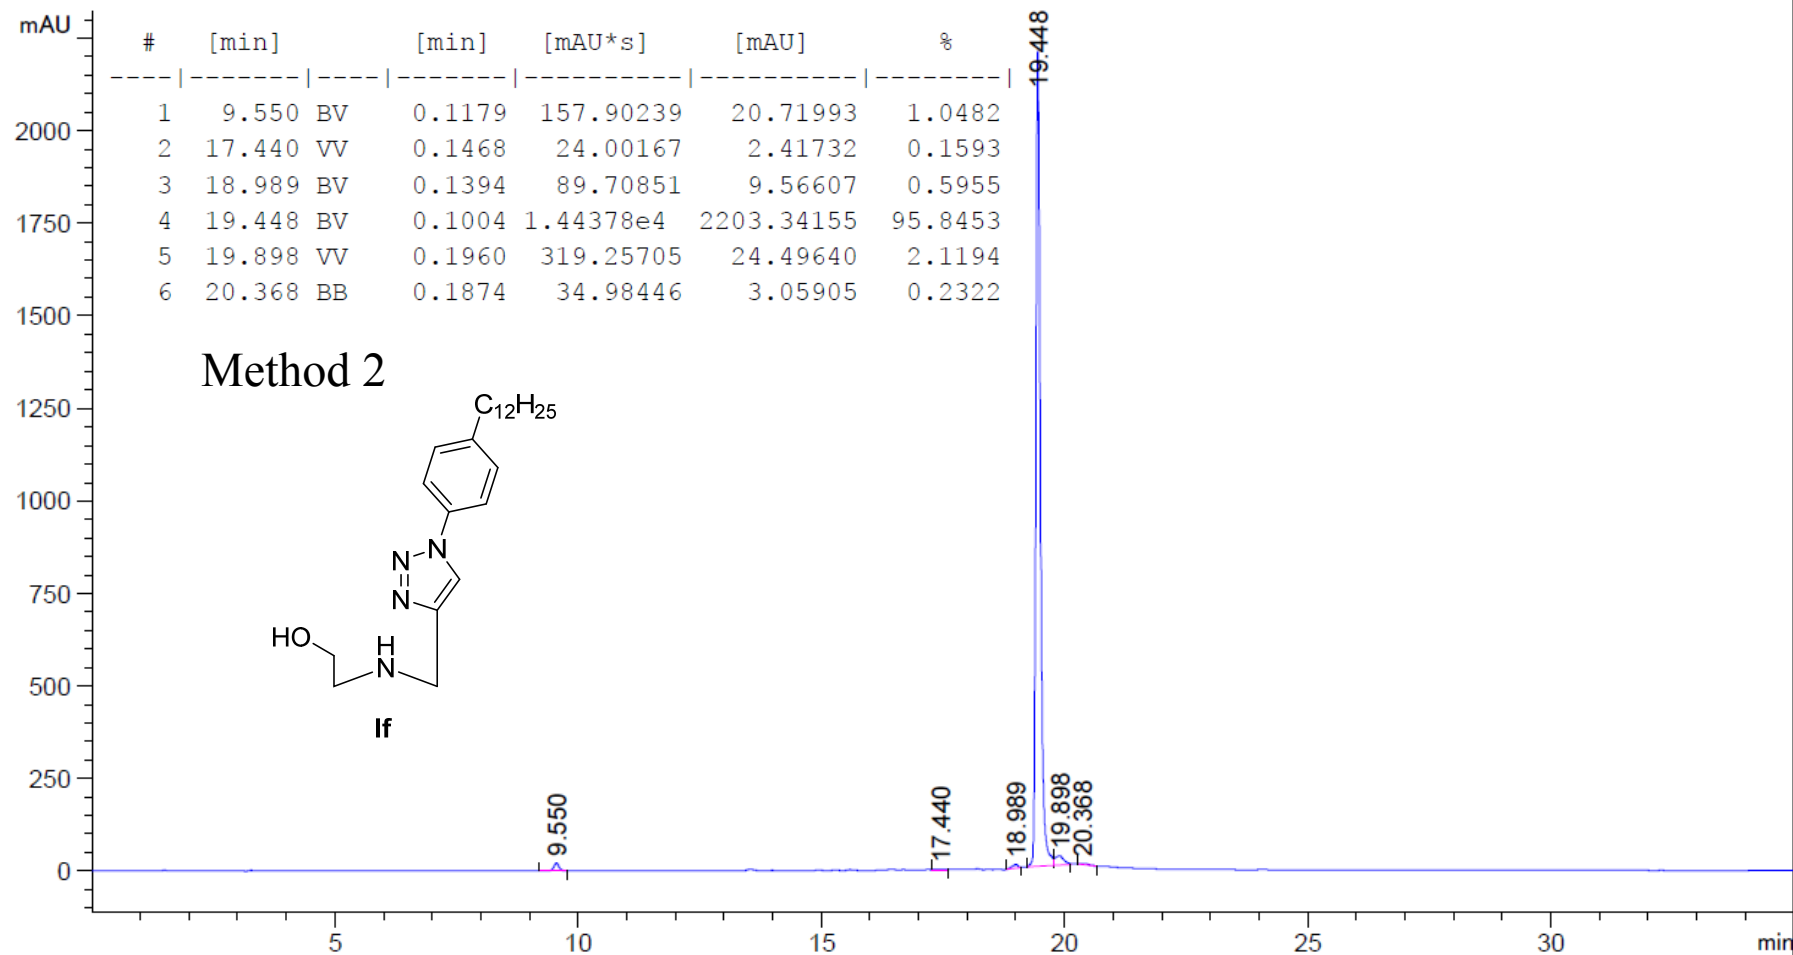

VWD1 A, Wavelength=254 nm (FY190425DEF\_LC.SFY 2019-06-01 17-27-19\024-0301.D)

| # | [min]  |    | [min]  | [mAU*s]   | [mAU]     | %       |
|---|--------|----|--------|-----------|-----------|---------|
| 1 | 15.891 | BB | 0.2316 | 45.42381  | 2.93477   | 0.2557  |
| 2 | 17.834 | BB | 0.3030 | 113.98190 | 5.65813   | 0.6416  |
| 3 | 20.017 | VB | 0.3708 | 48.42418  | 2.15827   | 0.2726  |
| 4 | 21.016 | BV | 0.4969 | 365.86841 | 10.46394  | 2.0595  |
| 5 | 22.452 | VV | 0.4081 | 1.71916e4 | 603.98199 | 96.7707 |

Method 1

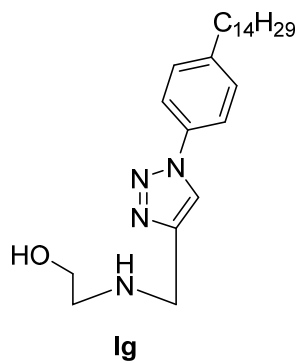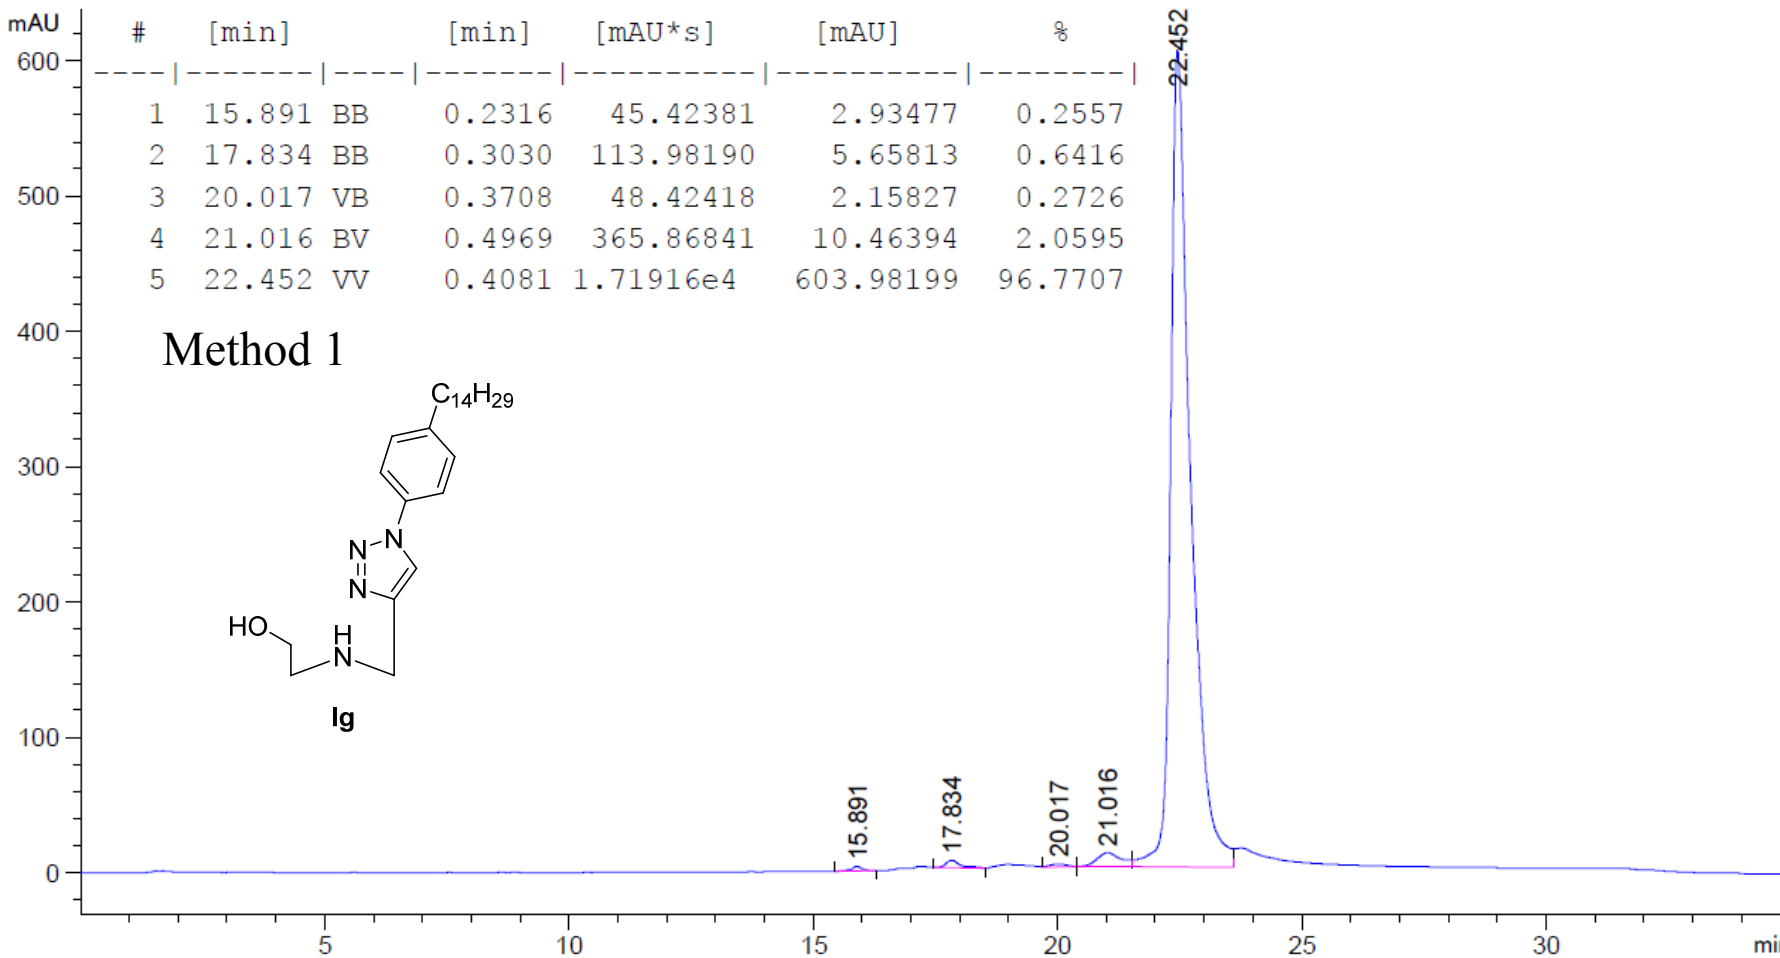

VWD1 A, Wavelength=254 nm (FY190425DEF\_LC.SFY 2019-06-04 09-49-02\024-0401.D)

| # | [min]  | [min] | [min]  | [mAU*s]   | [mAU]      | %       |
|---|--------|-------|--------|-----------|------------|---------|
| 1 | 17.293 | VB    | 0.1687 | 74.22266  | 6.15238    | 0.5062  |
| 2 | 18.198 | VV    | 0.1635 | 33.85910  | 2.89467    | 0.2309  |
| 3 | 18.990 | BB    | 0.1219 | 26.85925  | 3.48595    | 0.1832  |
| 4 | 19.450 | BV    | 0.1951 | 345.94815 | 26.54263   | 2.3592  |
| 5 | 19.993 | VV    | 0.1137 | 1.41829e4 | 1886.20056 | 96.7206 |

### Method 2

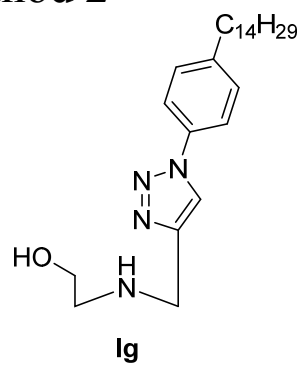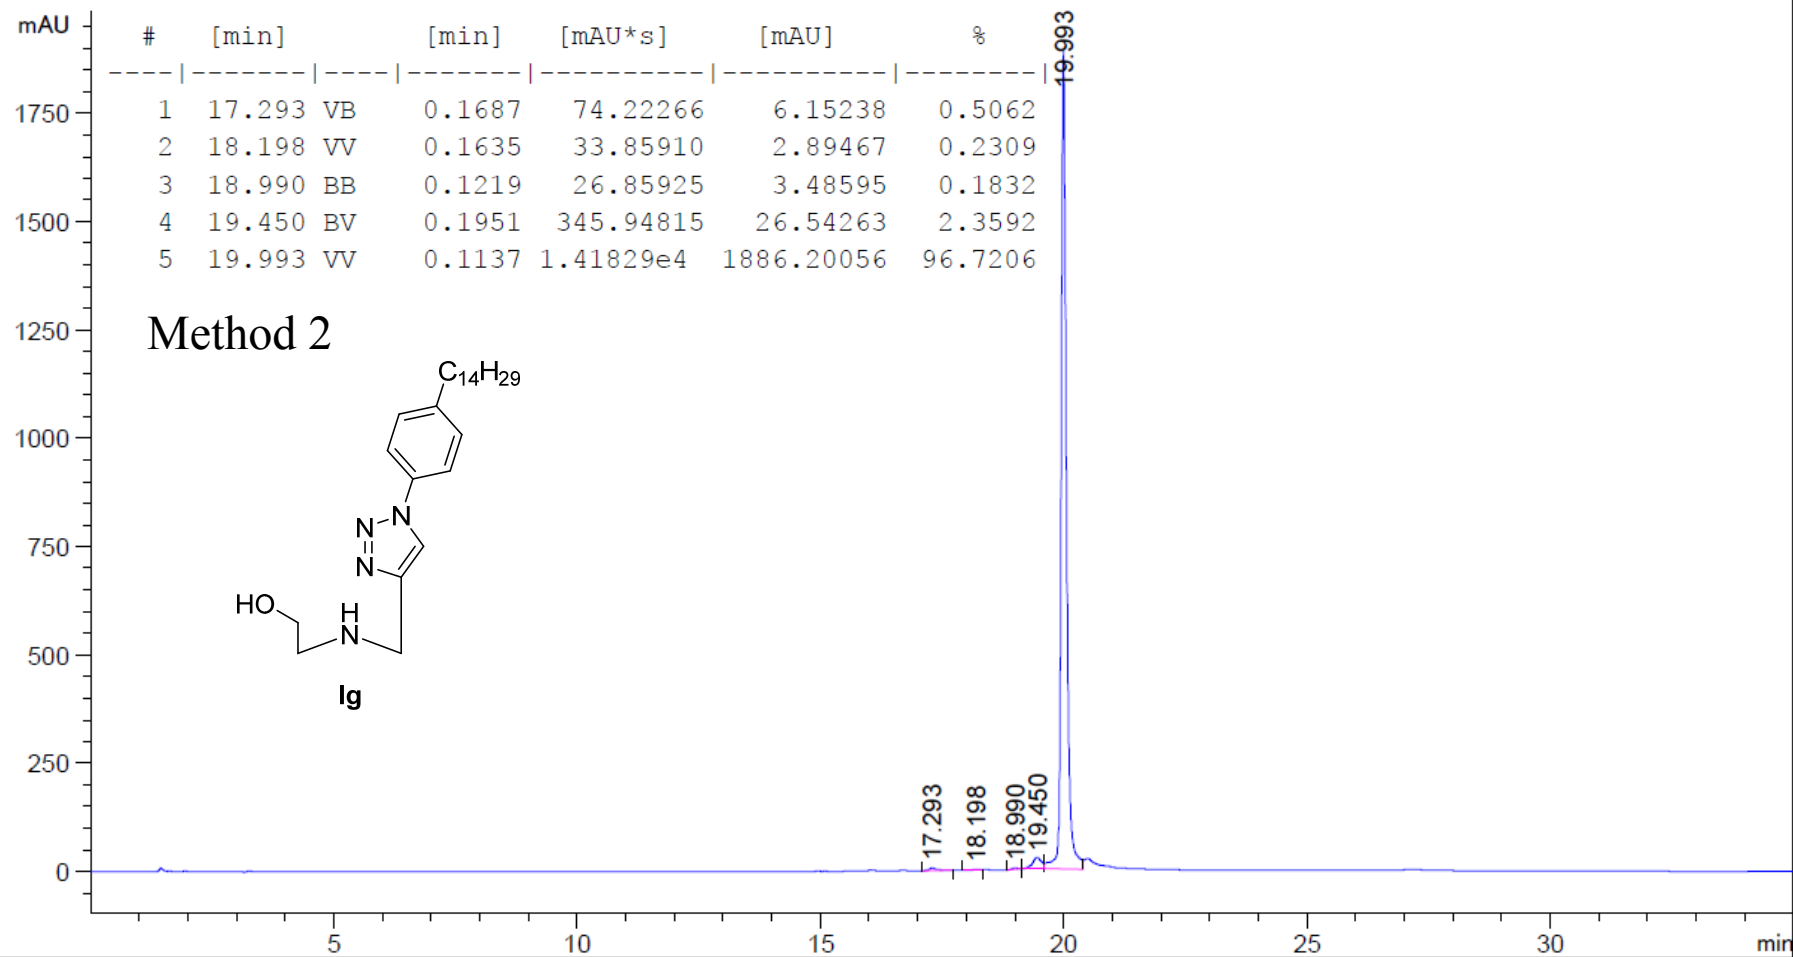

VWD1 A, Wavelength=254 nm (ZYH\2019-05-31 17-09-01.D)

| # | [min]  |    | [min]  | [mAU*s]   | [mAU]     | %       |
|---|--------|----|--------|-----------|-----------|---------|
| 1 | 11.021 | BB | 0.1880 | 36.88477  | 3.05239   | 0.1980  |
| 2 | 16.834 | BV | 0.2815 | 42.22526  | 2.21399   | 0.2266  |
| 3 | 17.224 | VB | 0.2975 | 88.62632  | 4.62699   | 0.4756  |
| 4 | 21.085 | BB | 0.3243 | 44.18845  | 2.19096   | 0.2372  |
| 5 | 22.187 | BB | 0.3845 | 65.28121  | 2.61316   | 0.3504  |
| 6 | 23.365 | BV | 0.3844 | 236.39168 | 8.39860   | 1.2687  |
| 7 | 23.666 | VV | 0.2826 | 172.78238 | 8.93348   | 0.9273  |
| 8 | 24.402 | VB | 0.4883 | 1.79466e4 | 527.01984 | 96.3163 |

Method 1

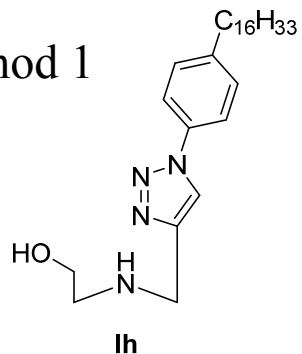

1h

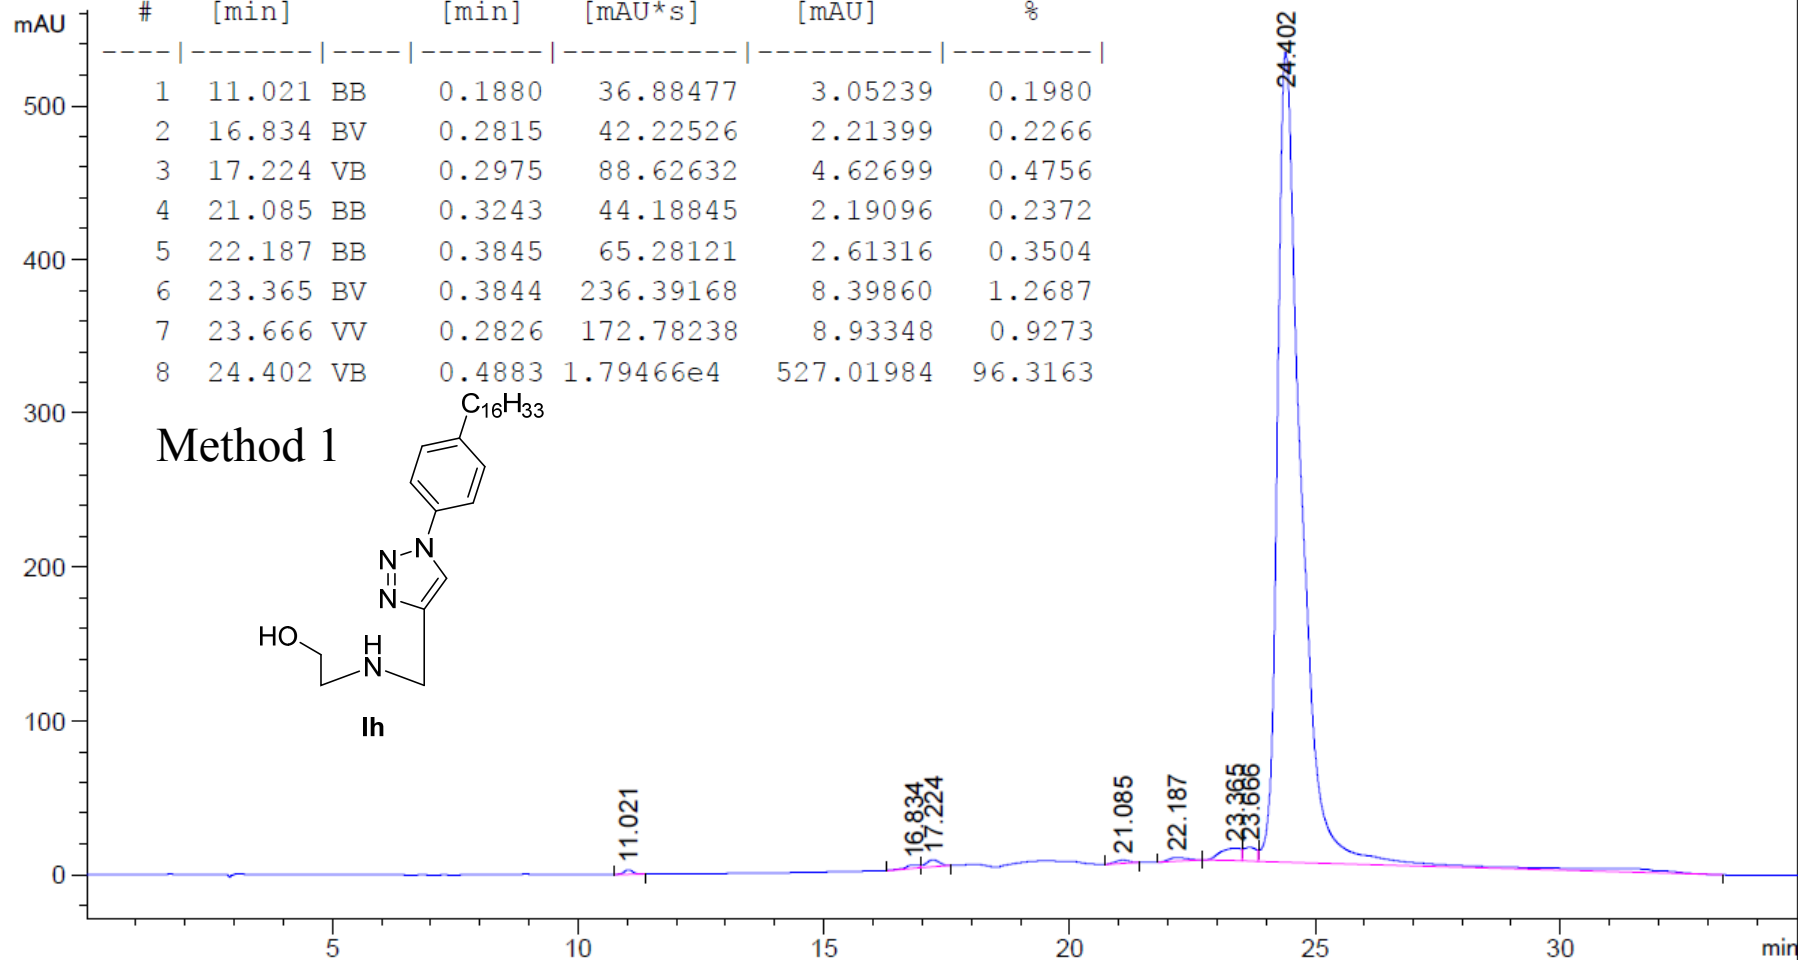

VWD1 A, Wavelength=254 nm (FY190425DEF\_LC.SFY 2019-06-04 20-15-25\038-0201.D)

| # | [min]  |    | [min]  | [mAU*s]   | [mAU]      | %       |
|---|--------|----|--------|-----------|------------|---------|
| 1 | 18.257 | BV | 0.1343 | 52.39722  | 6.03583    | 0.2568  |
| 2 | 18.387 | VB | 0.1107 | 41.96924  | 5.40082    | 0.2057  |
| 3 | 18.991 | BB | 0.1263 | 74.50204  | 9.21969    | 0.3651  |
| 4 | 19.469 | VB | 0.1123 | 179.31879 | 24.54010   | 0.8788  |
| 5 | 19.921 | VV | 0.1582 | 301.92313 | 26.84204   | 1.4797  |
| 6 | 20.195 | VV | 0.1144 | 104.36230 | 13.03116   | 0.5115  |
| 7 | 20.643 | VB | 0.1354 | 1.96504e4 | 2154.62598 | 96.3025 |

Method 2

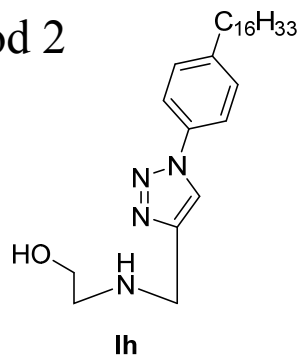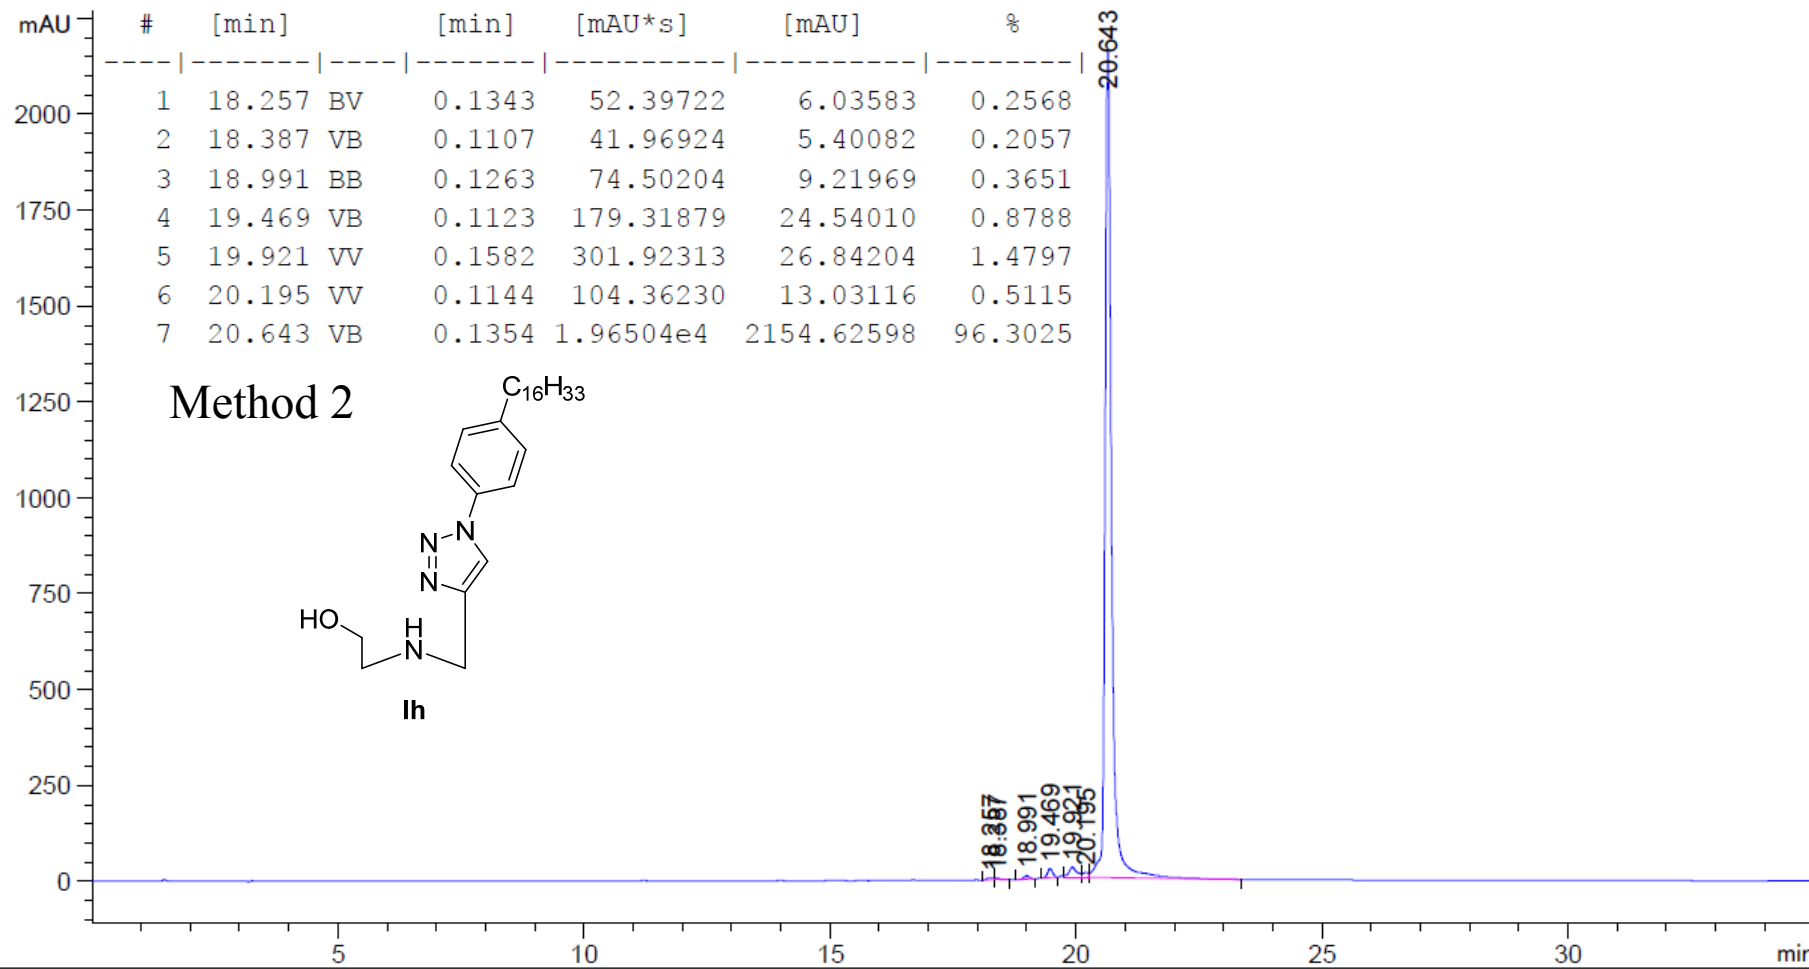

VWD1 A, Wavelength=254 nm (FY190425DEF\_LC.SFY 2019-06-01 17-27-19\027-0601.D)

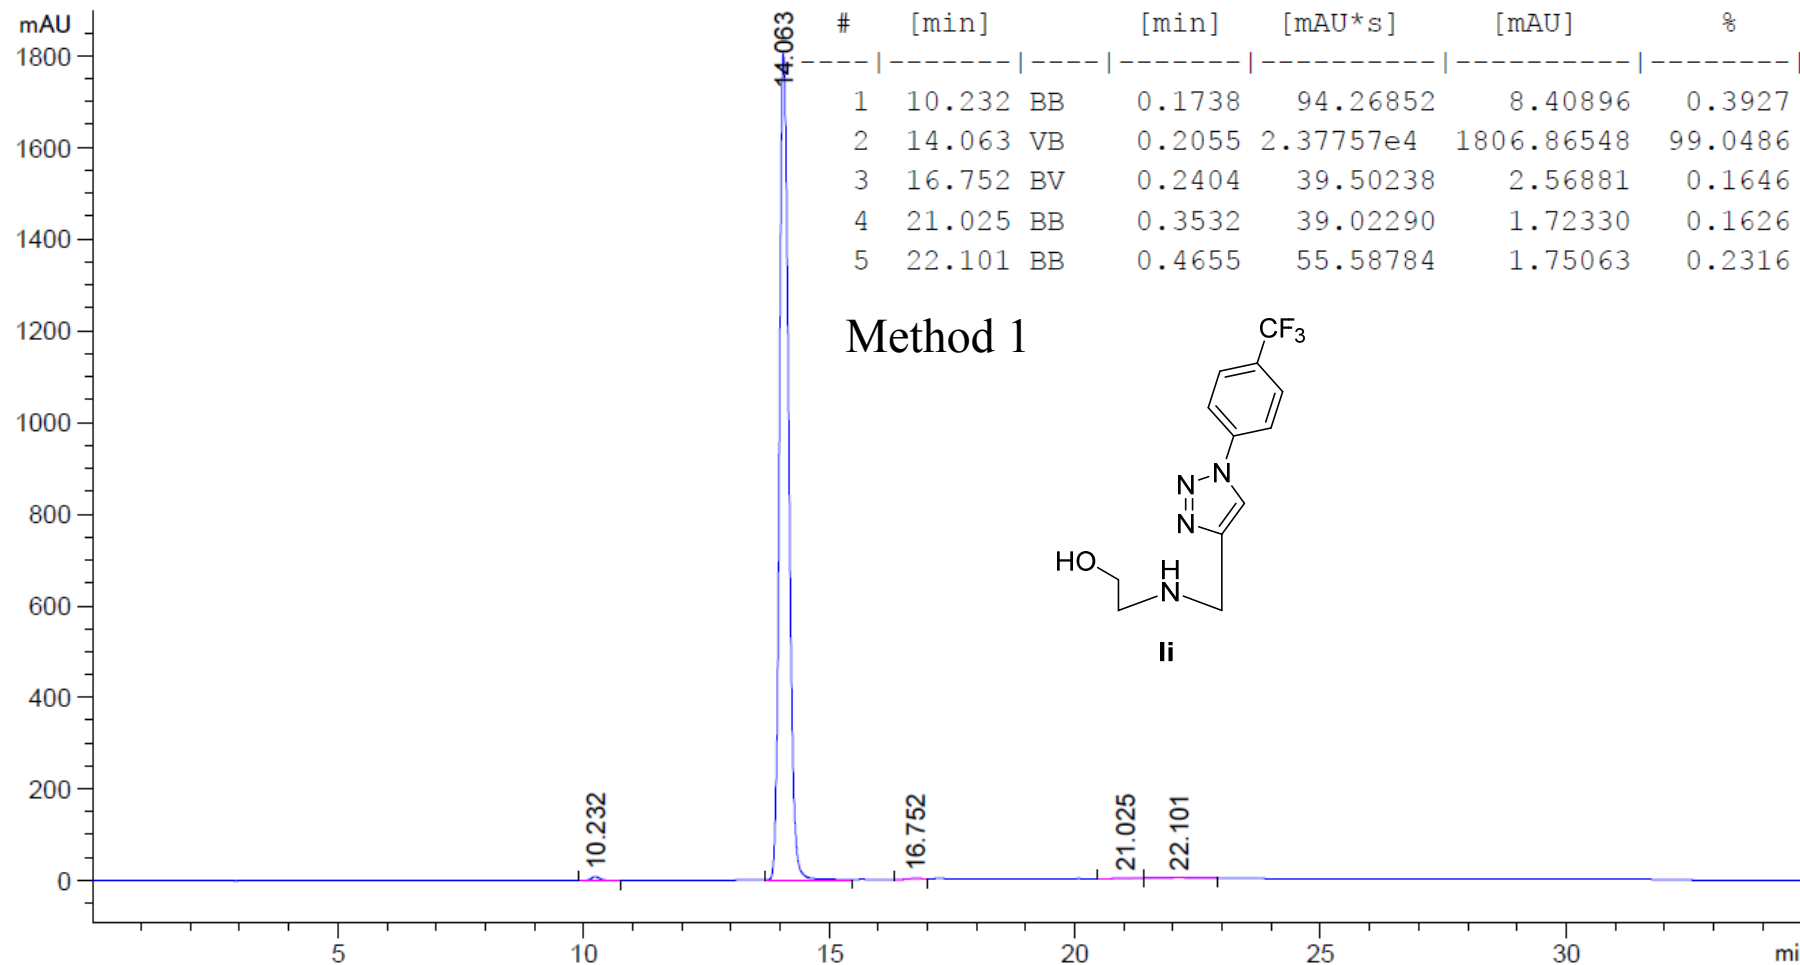

VWD1 A, Wavelength=254 nm (FY190425DEF\_LC.SFY 2019-06-04 09:49:02\027-0701.D)

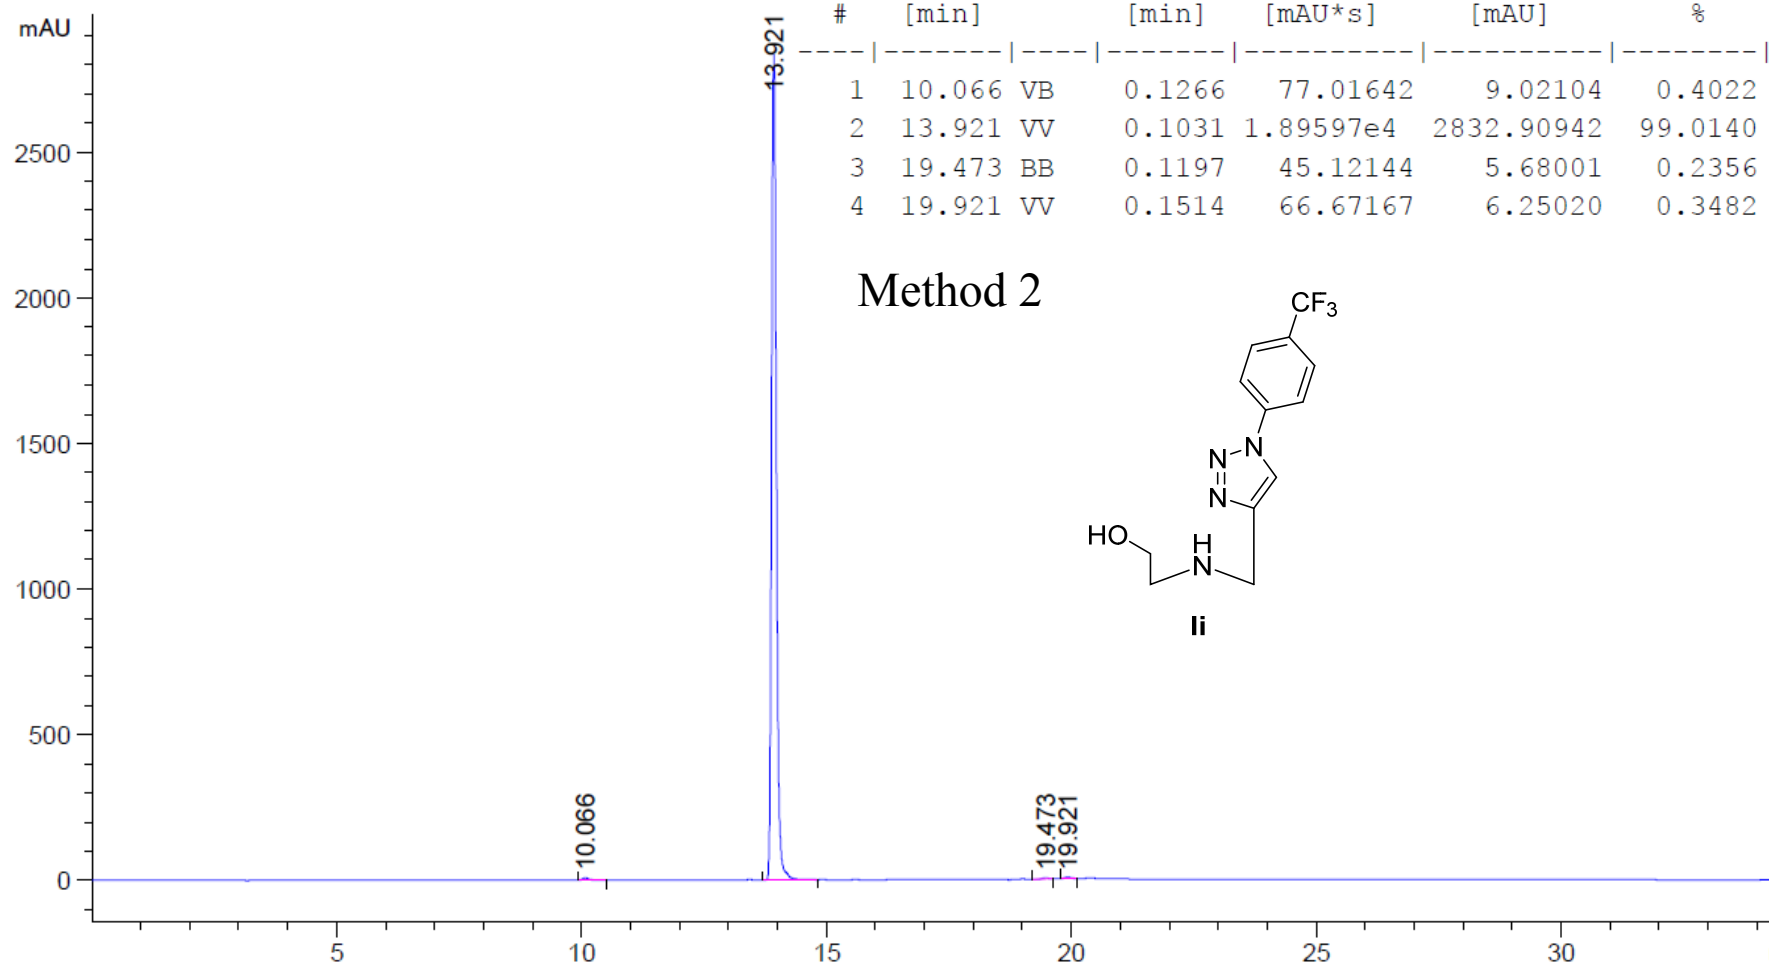



VWD1 A, Wavelength=254 nm (FY190425DEF\_LC.SFY 2019-06-03 10-50-51\028-0101.D)

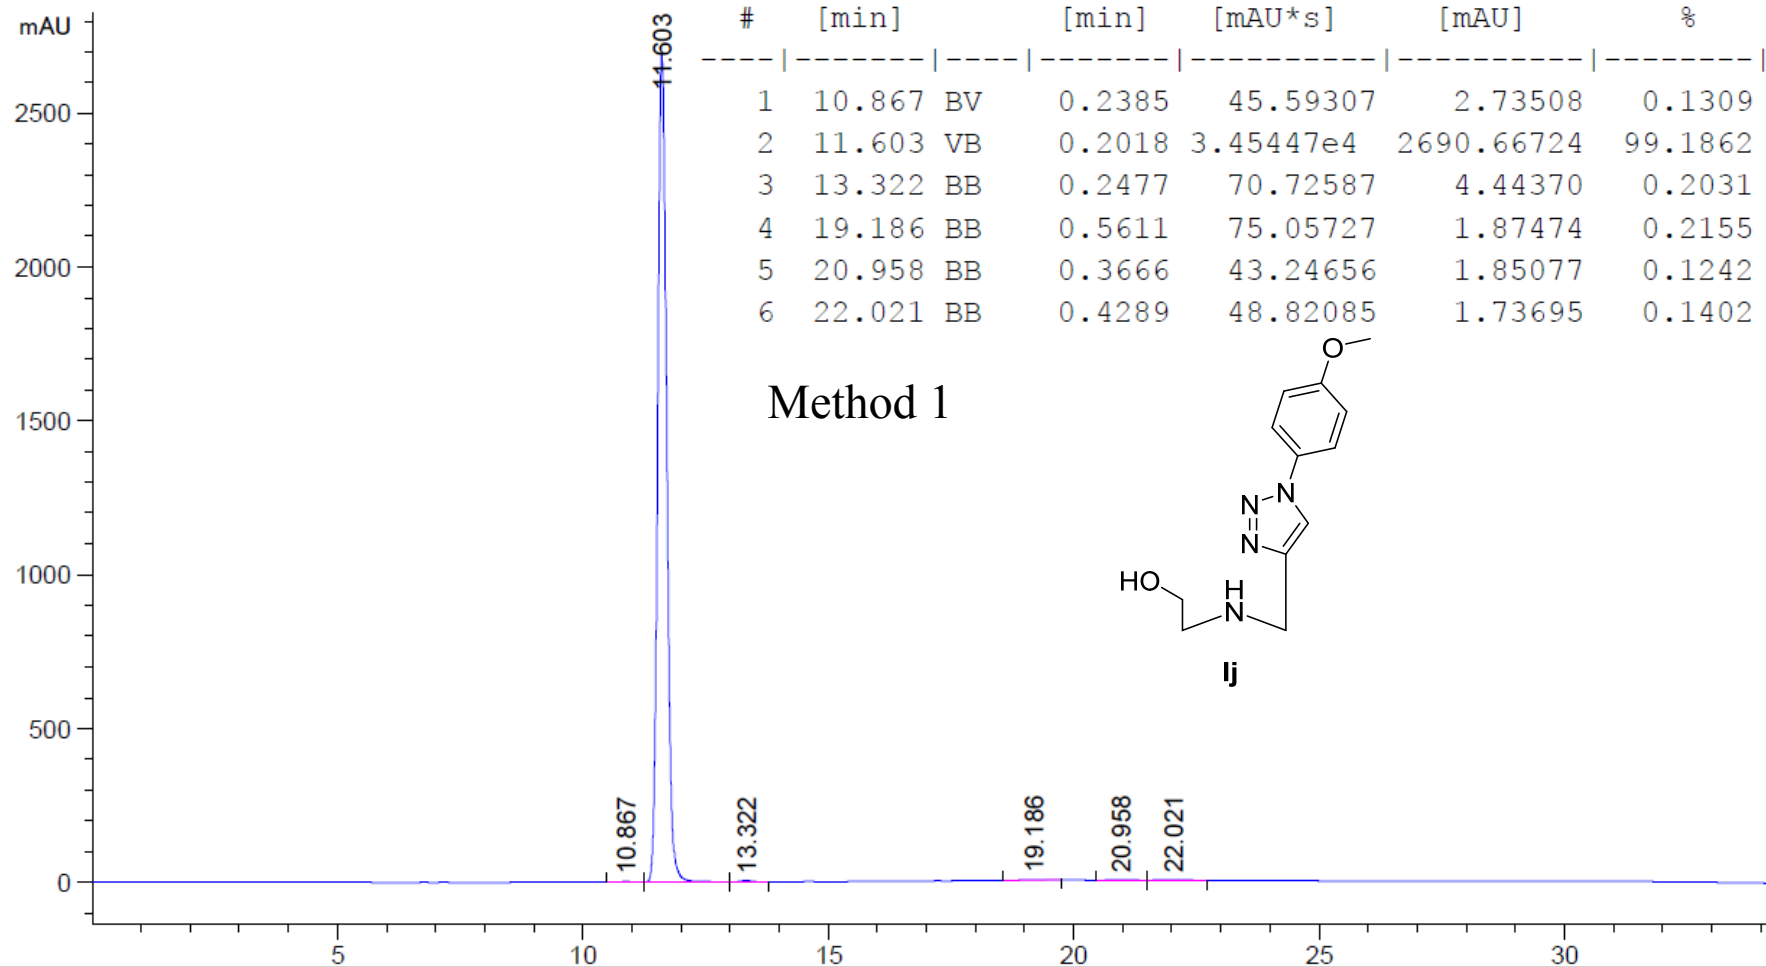

VWD1 A, Wavelength=254 nm (FY190425DEF\_LC.SFY 2019-06-04 09-49-02\028-0801.D)

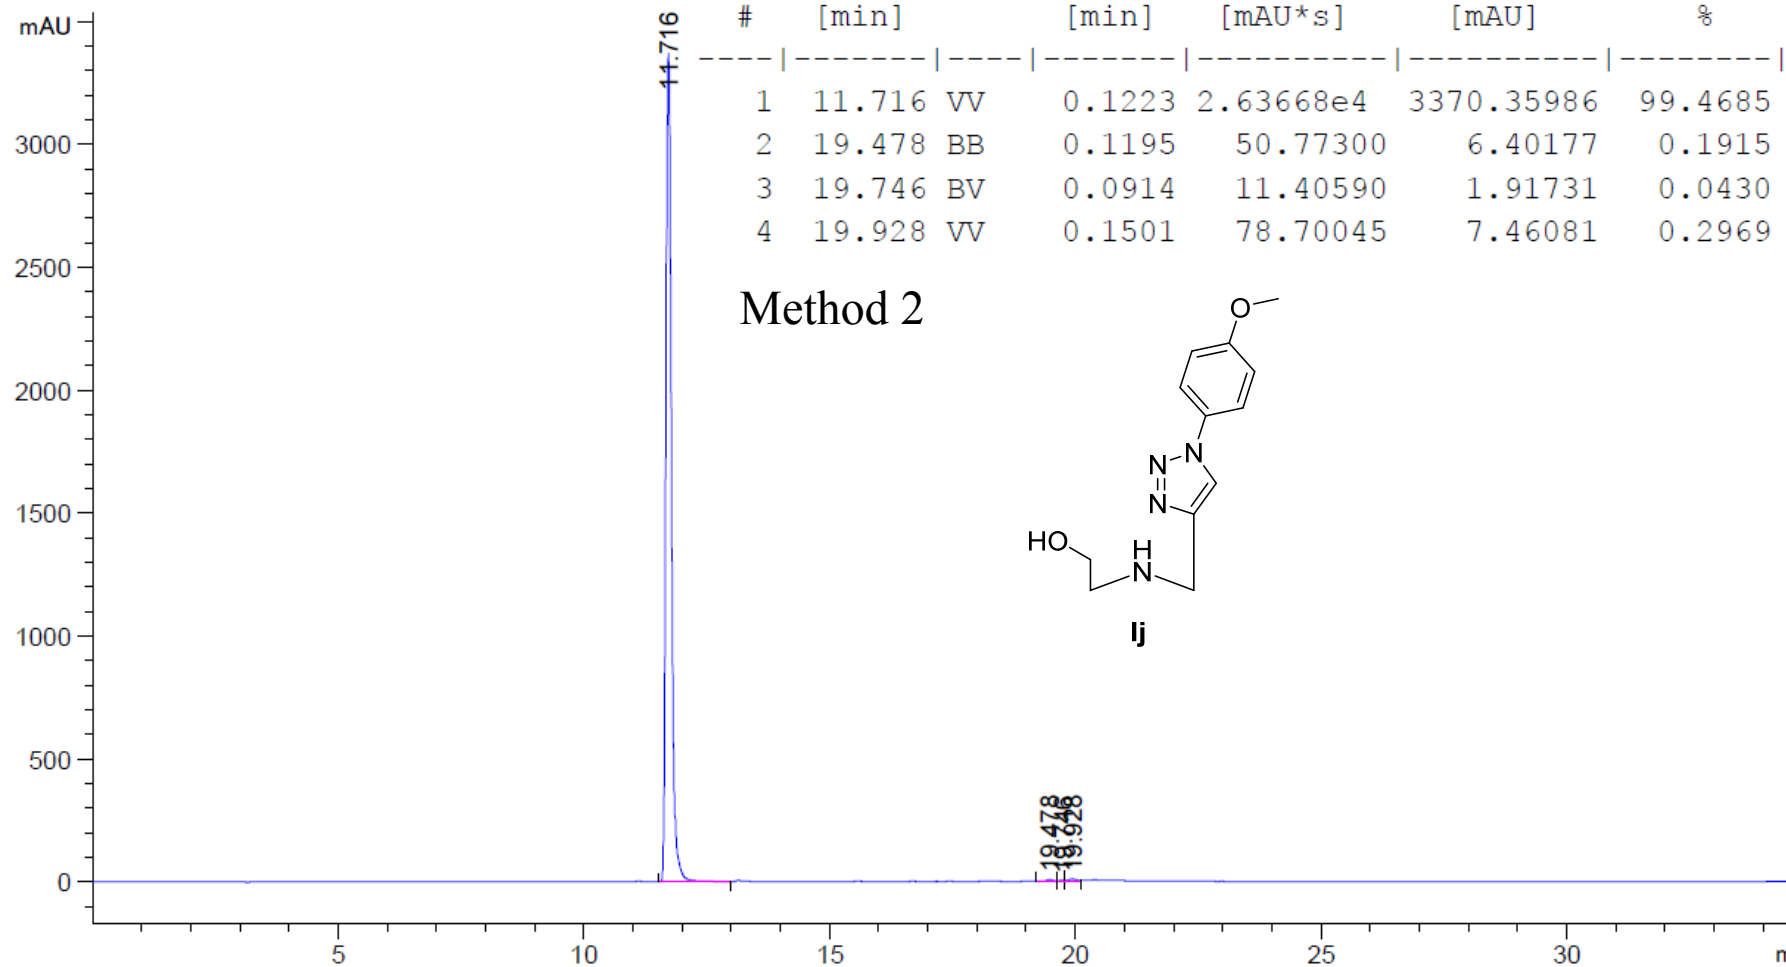

Method 2

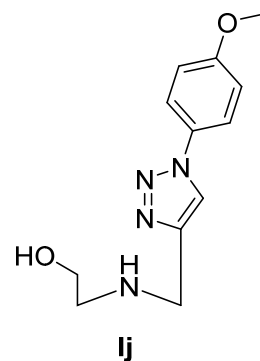

VWD1 A, Wavelength=254 nm (FY190425DEF\_LC.SFY 2019-06-01 17-27-19\026-0501.D)

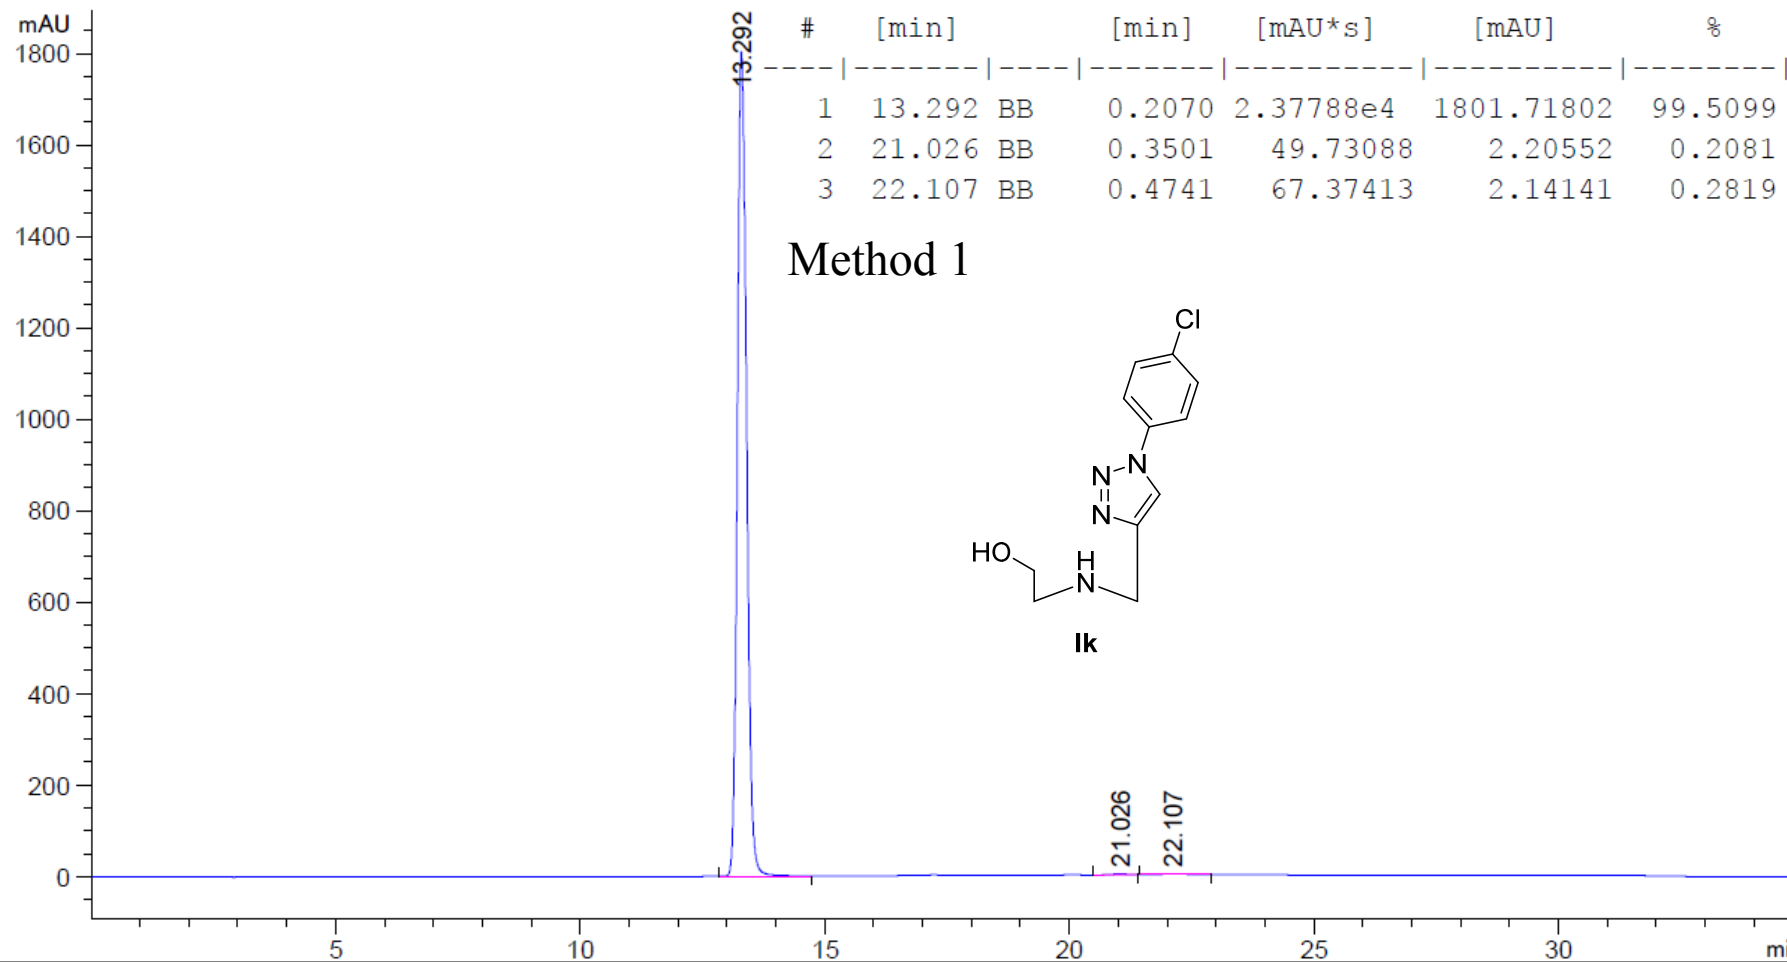

VWD1 A, Wavelength=254 nm (FY190425DEF\_LC.SFY 2019-06-04 09-49-02\026-0601.D)

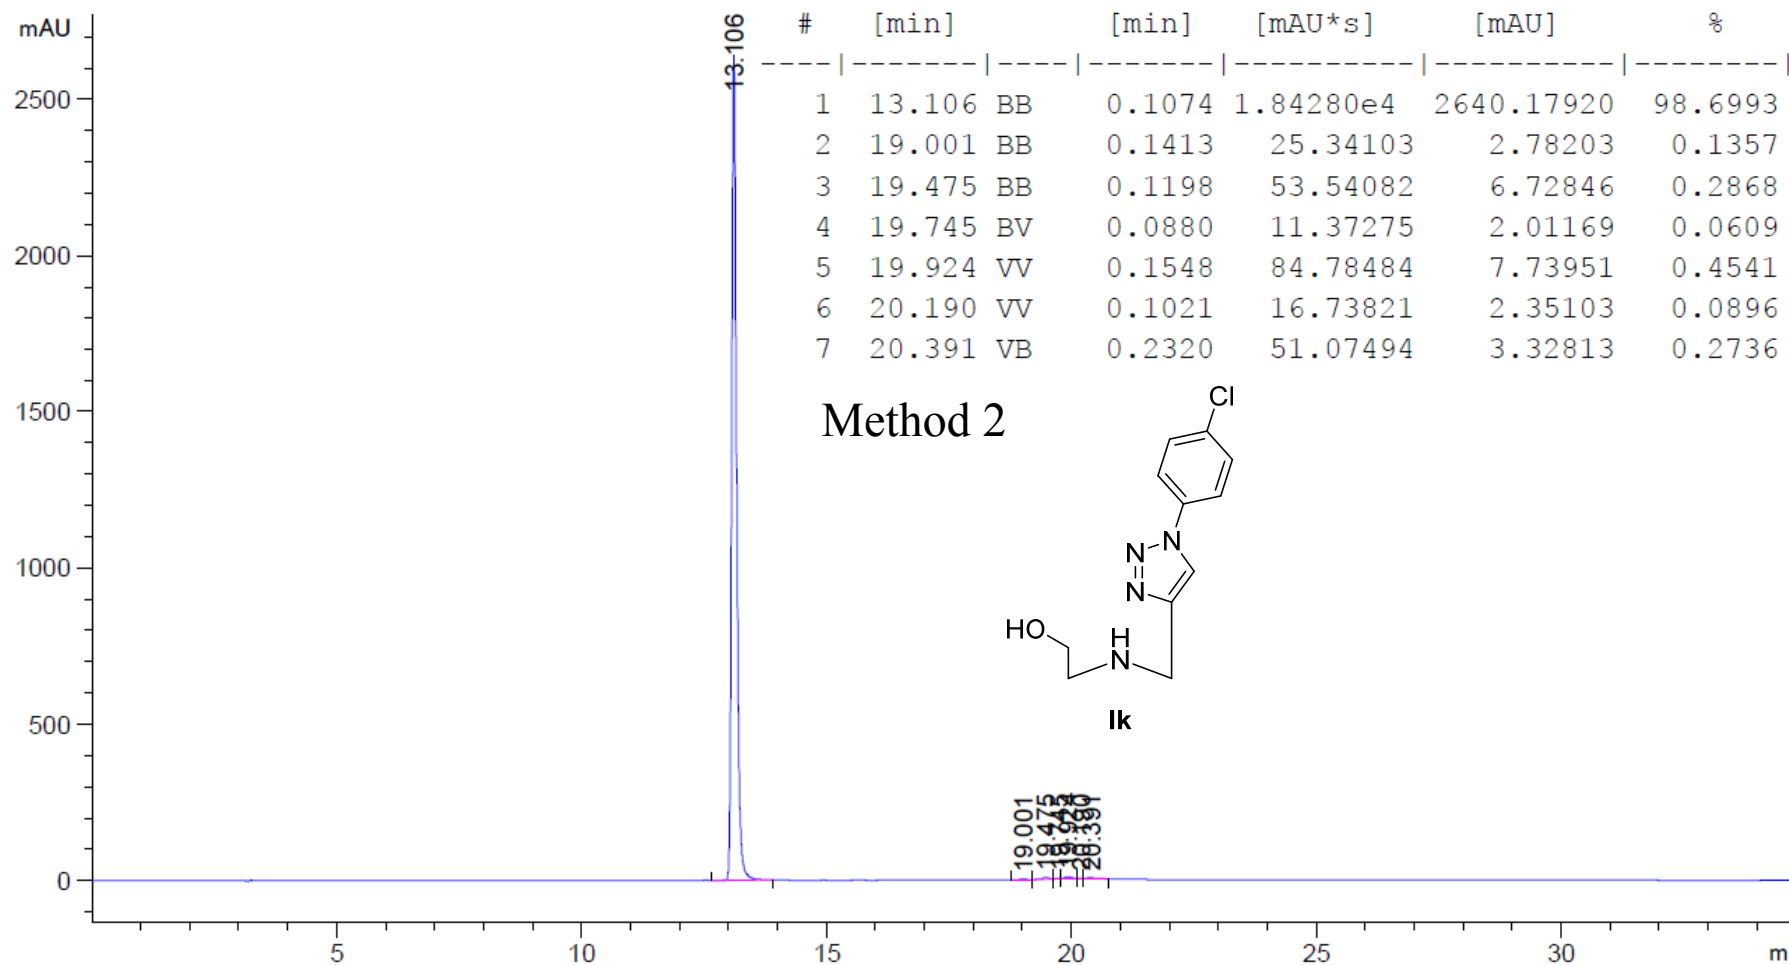

VWD1 A, Wavelength=254 nm (FY190425DEF\_LC.SFY 2019-06-01 13-08-14\015-0101.D)

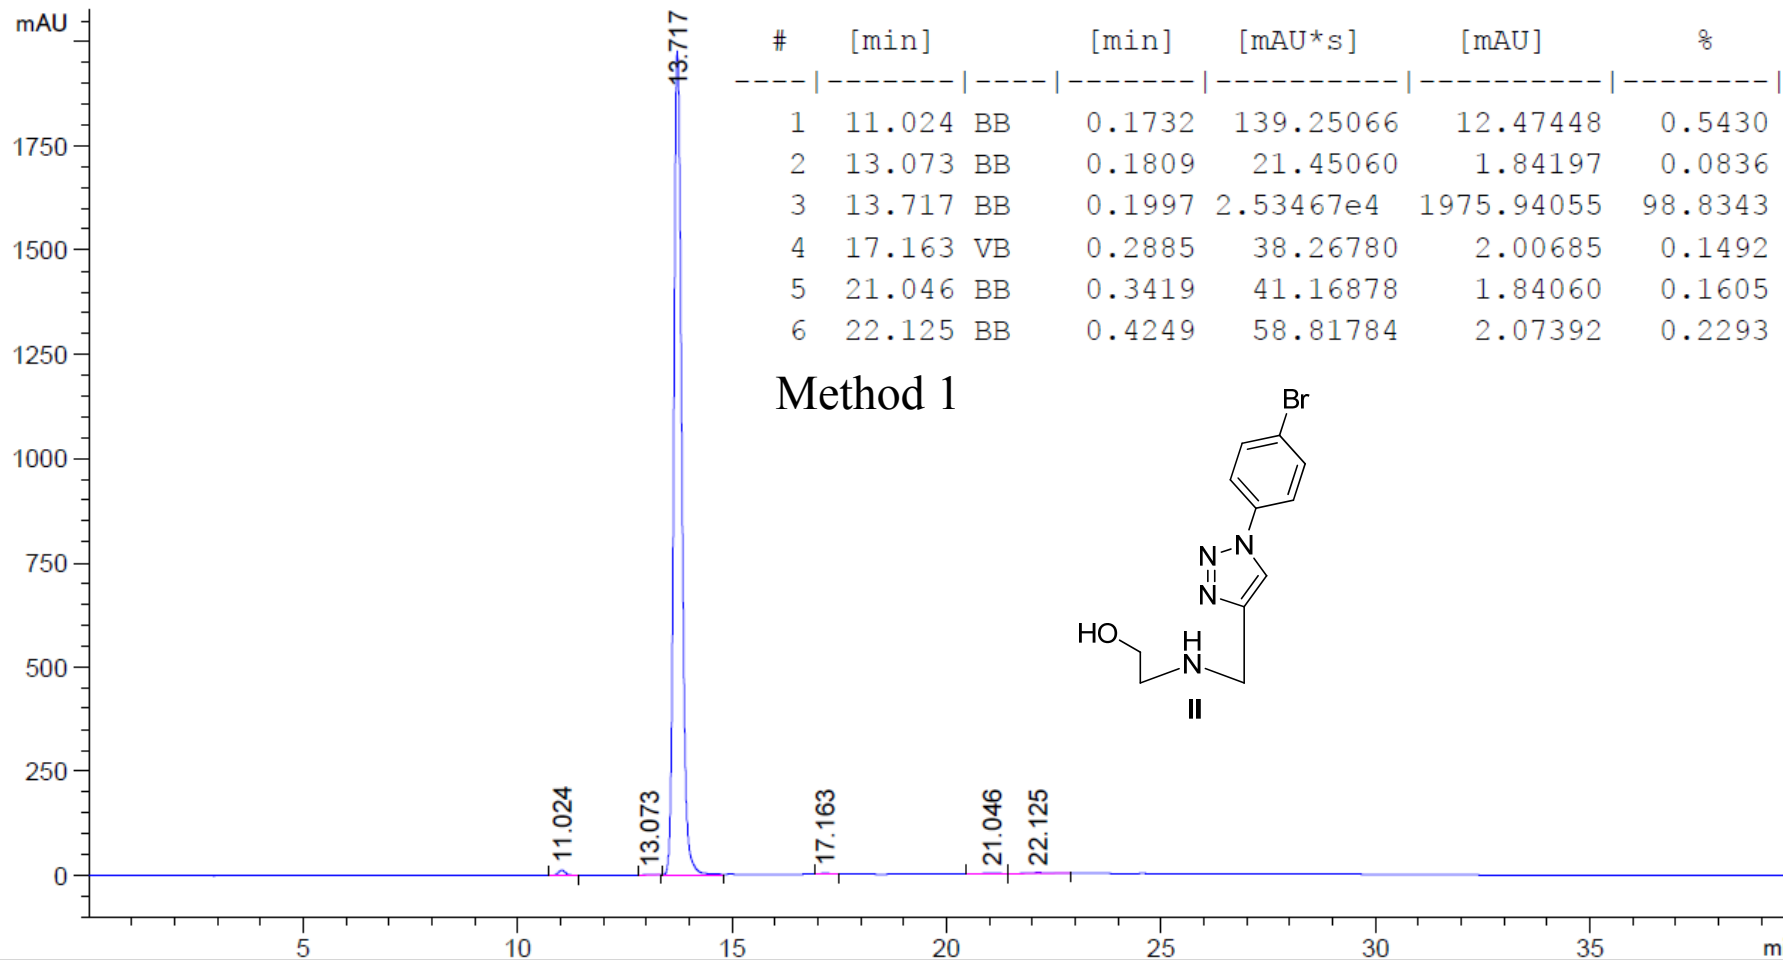

Method 1

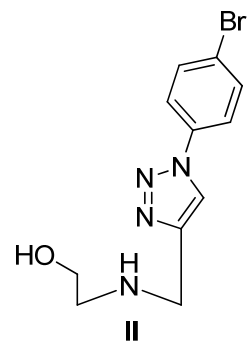

VWD1 A, Wavelength=254 nm (FY190425DEF\_LC.SFY 2019-06-03 19-02-07\012-0201.D)

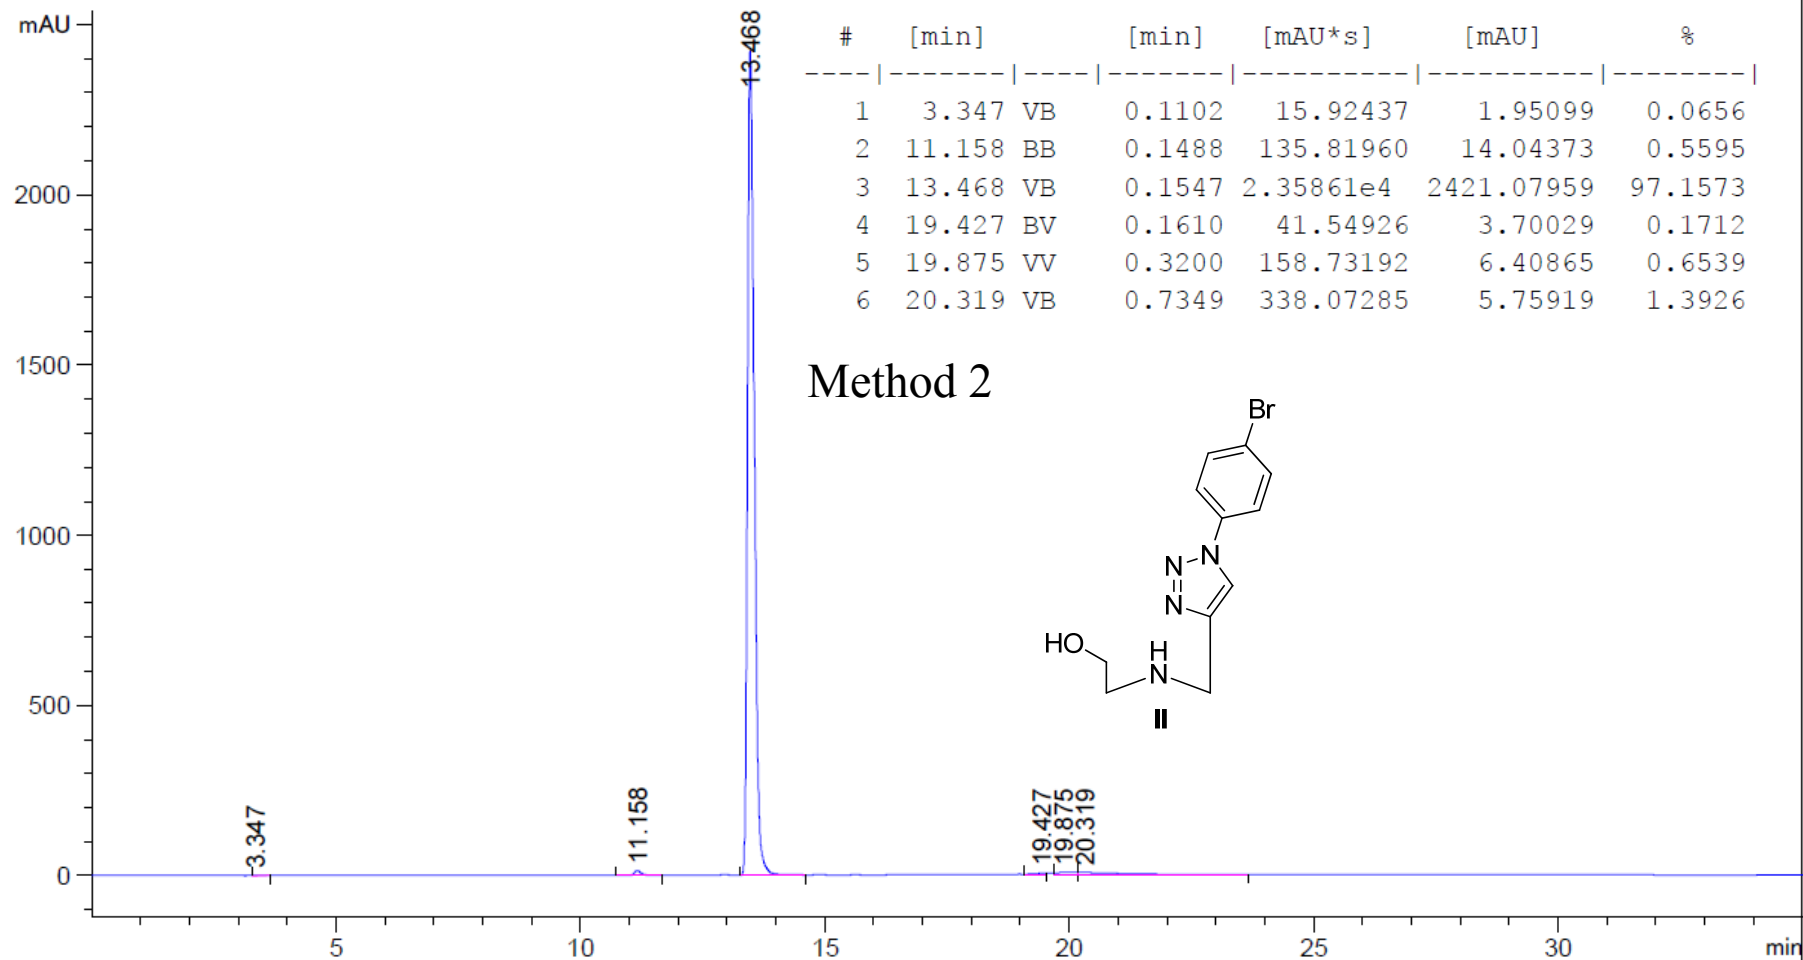

Supplement: d0ob02164d1.pdf [file d0ob02164d1.pdf]
